# Supplementary material for: Profiling of basal and ligand-dependent GPCR activities by means of a polyvalent cell-based high-throughput platform
Source: PubMed Central journal article supplement (PMC10322906; doi:10.1038/s41467-023-39132-x), 2023-07-05

# Supplementary Information for

Profiling of basal and ligand-dependent GPCR activities by means of a polyvalent cell-based high-throughput platform

Manel Zeghal<sup>1</sup>, Geneviève Laroche<sup>1</sup>, Julia Douglas Freitas<sup>1</sup>, Rebecca Wang<sup>1</sup>, Patrick M. Giguère<sup>1,2\*</sup>

<sup>1</sup>Department of Biochemistry, Microbiology and Immunology, University of Ottawa, Ottawa, ON, K1H8M5, Canada

<sup>2</sup>Brain and Mind Research Institute, University of Ottawa, Ottawa, ON, K1H8M5, Canada

\*Correspondence to Patrick M. Giguère. Email: [patrick.giguere@uottawa.ca](mailto:patrick.giguere@uottawa.ca)

# Supplemental Figures

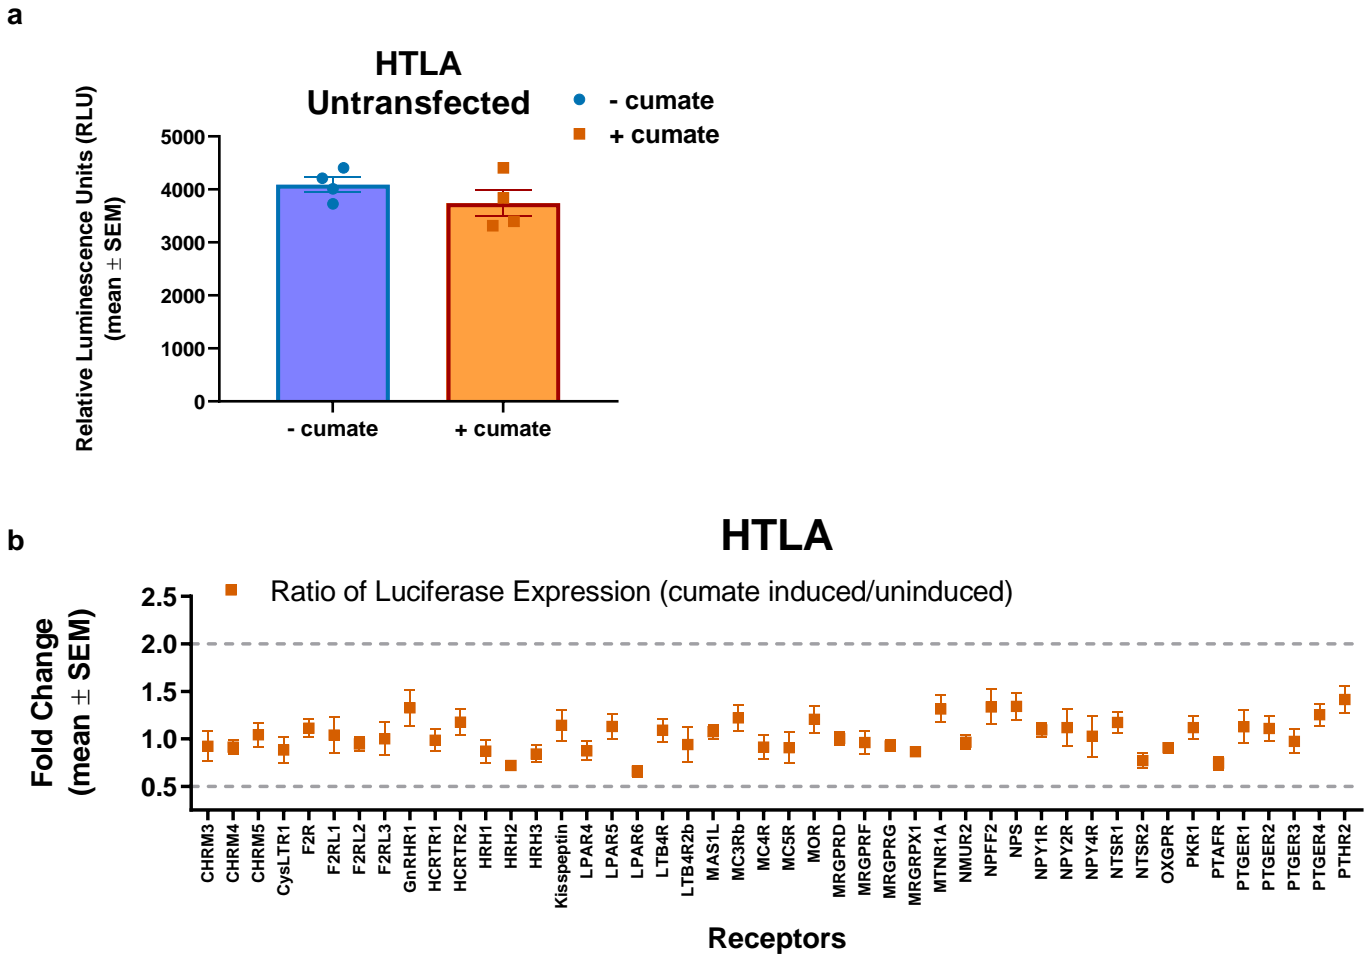

**Supplementary Figure 1. Assessment of the effect of cumate in the PRESTO-Tango (cumate-independent system).** To confirm that cumate itself does not possess any agonistic or antagonistic properties in a cumate-independent system, HTLA cells from the PRESTO-Tango platform were plated in the presence and absence of cumate (30  $\mu\text{g}/\text{mL}$ ) (a) and were transfected with a panel of diverse GPCR Tango constructs (b). 96 hours following its initial addition, fold changes in basal arrestin recruitment were calculated between the wells in the absence or presence of cumate. Data are presented as mean values, with error bars representing SEM (Supplementary Fig 1A:  $n = 12$ , with 3 technical replicates from 4 biological samples; Supplementary Fig 1B:  $n = 4$ , with 4 technical replicates from one biological sample). Generic receptor codes refer to the GPCR-Tango constructs.

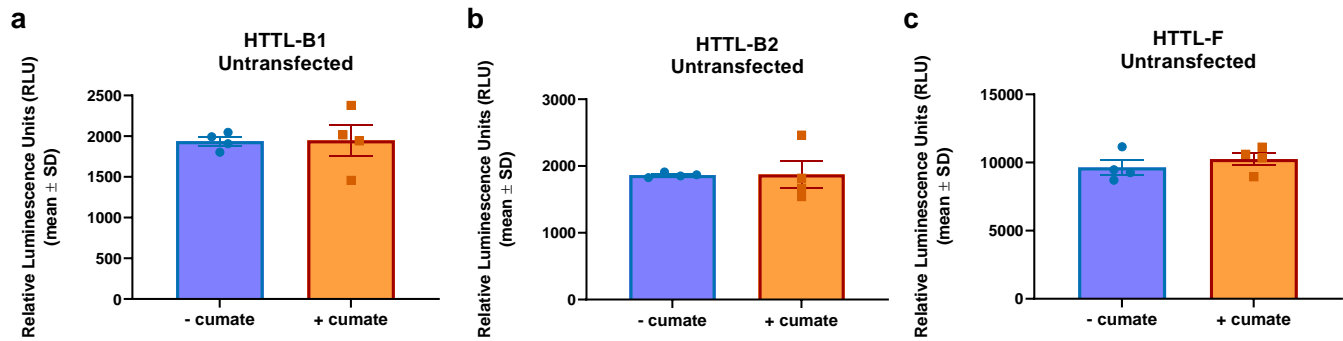

**Supplementary Figure 2. Baseline signal of Tango-Trio cell lines.** (A-C) HTTL-B1, HTTL-B2, and HTTL-F cells were plated in the presence or absence of cumate (30  $\mu\text{g}/\text{mL}$ ), which was maintained throughout (totalling approximately 72 hours). As per standard protocol, cells were serum starved for the last 24 hours of the experiment, and luminescence was subsequently read to compare the differences in baseline signal of untransfected cells. Data are presented as mean values, with error bars representing SD ( $n = 12$ , with 3 technical replicates from 4 biological samples).

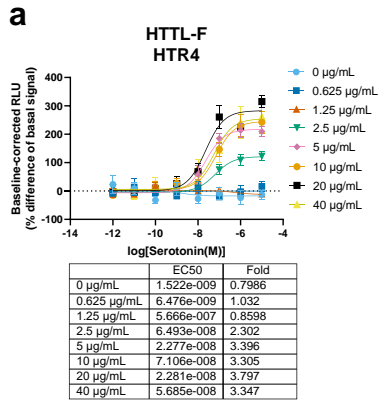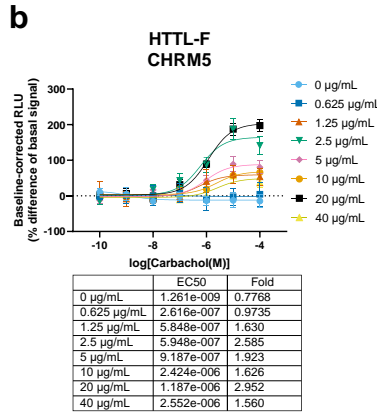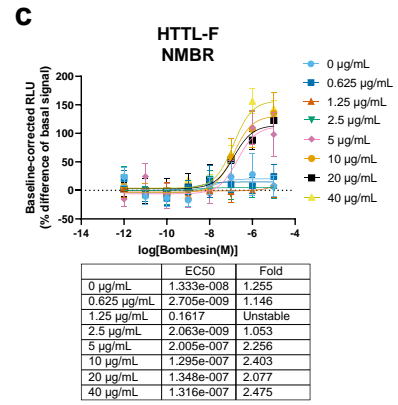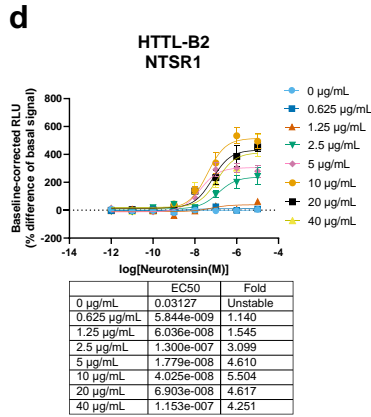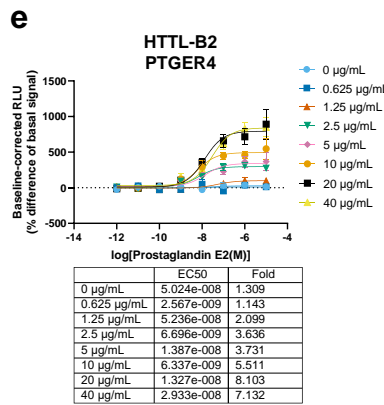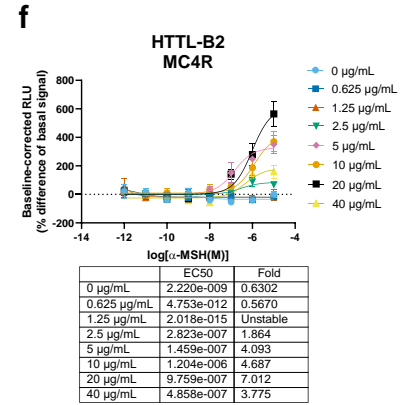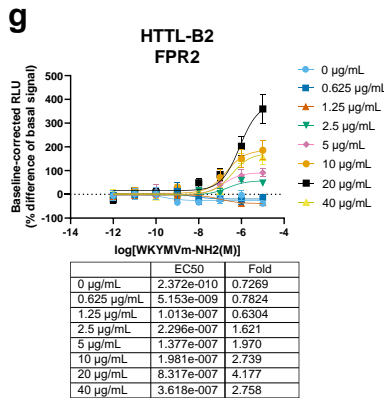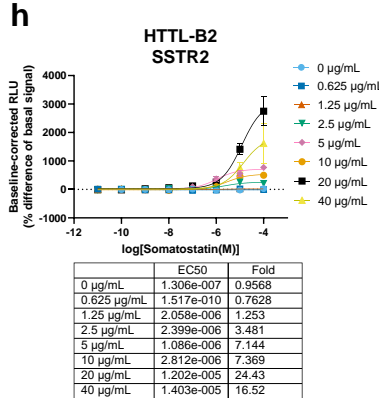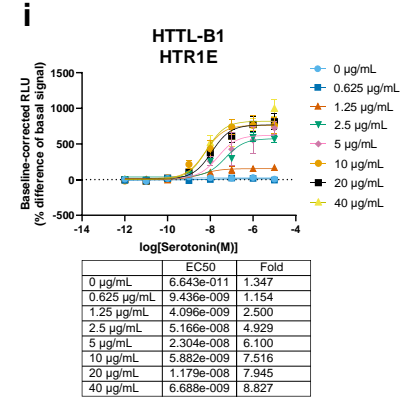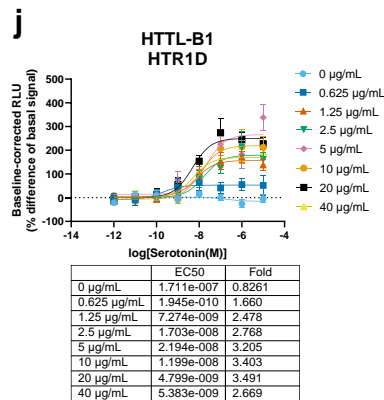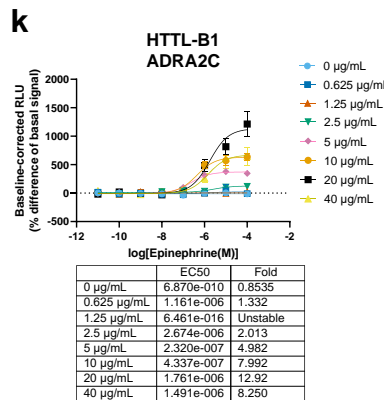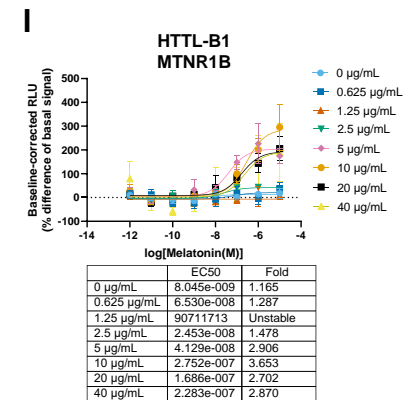

**Supplementary Figure 3. Changes in baseline signals and fold windows due to cumate induction.** HTTL-B1, HTTL-B2 and HTTL-F cells were plated in increasing concentrations of cumate (0, 0.625, 1.25, 2.5, 5, 10, 20, and 40  $\mu\text{g}/\text{mL}$ ), which was maintained throughout the entire experiment, and were transfected with select GPCRs: HTR4 (a), CHRM5 (b), and NMBR (c) in HTTL-F; NTSR1 (d), PTGER4 (e), MC4R (f), FPR2 (g), and SSTR2 (h) in HTTL-B2; HTR1E (i), HTR1D (j), ADRA2C (k), and MTNR1B (l) in HTTL-B1. Transfected cells were stimulated with the receptor specific agonist and dose-response curves were built using XY analysis for non-linear regression curve and the 3-parameters dose-response stimulation function, followed by baseline correction. Data are presented as mean values, with error bars representing SEM ( $n = 3$ , with three technical replicates from one biological sample). Generic receptor codes refer to the GPCR-Tango constructs.

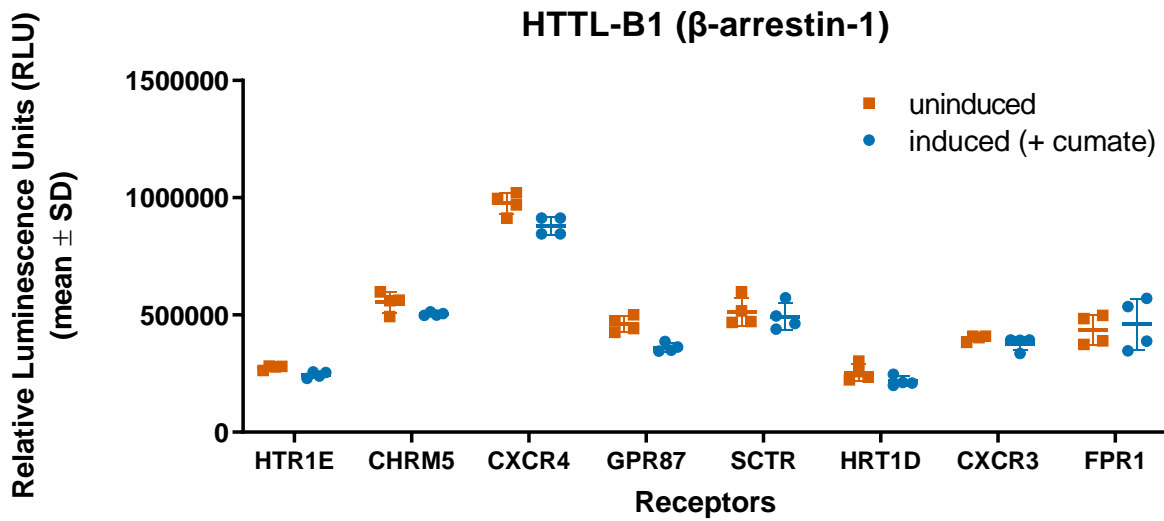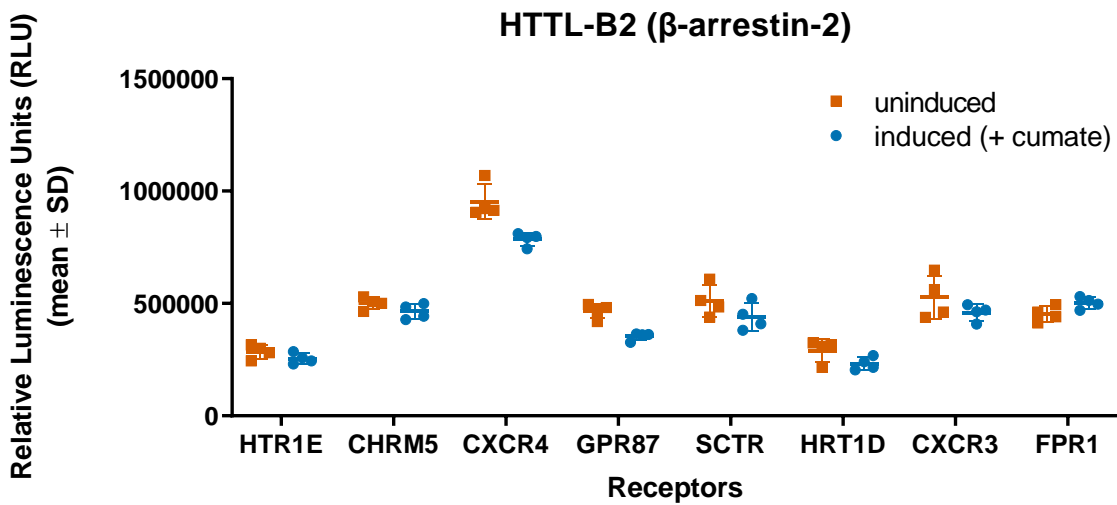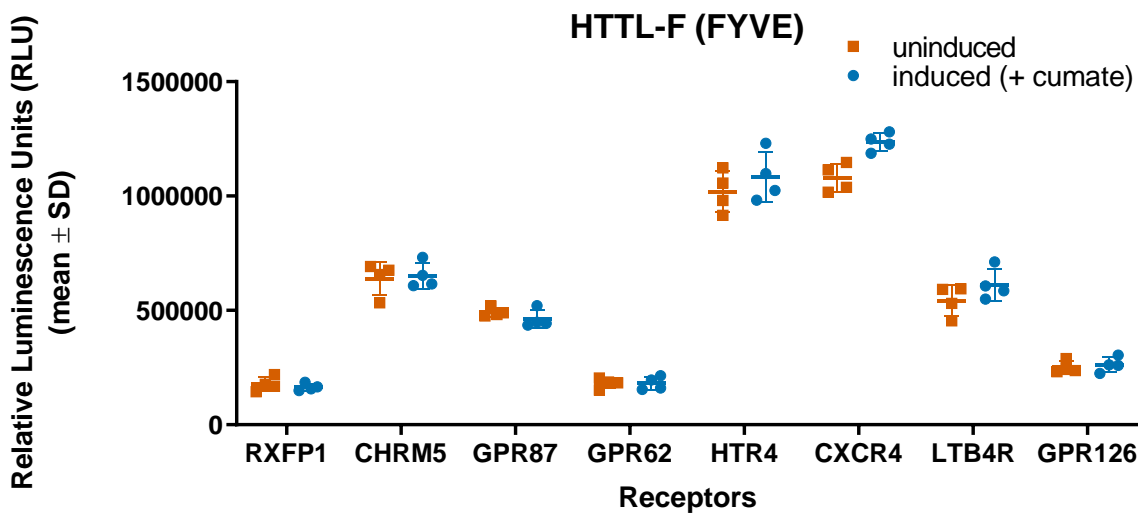

**Supplementary Figure 4. Receptor surface expression following cumate induction of fusion protein expression** HTTL-B1, HTTL-B2 and HTTL-F were plated in the presence or absence of cumate (30  $\mu\text{g/mL}$ ) and were transfected with a select number of positive GPCR hits from the constitutive HTS. ELISA experiments were subsequently carried out on transfected cells to determine receptor surface expression. Data are presented as mean values, with error bars representing SD (n = 4, with four technical replicates from one biological sample). Generic receptor codes refer to the GPCR-Tango constructs.

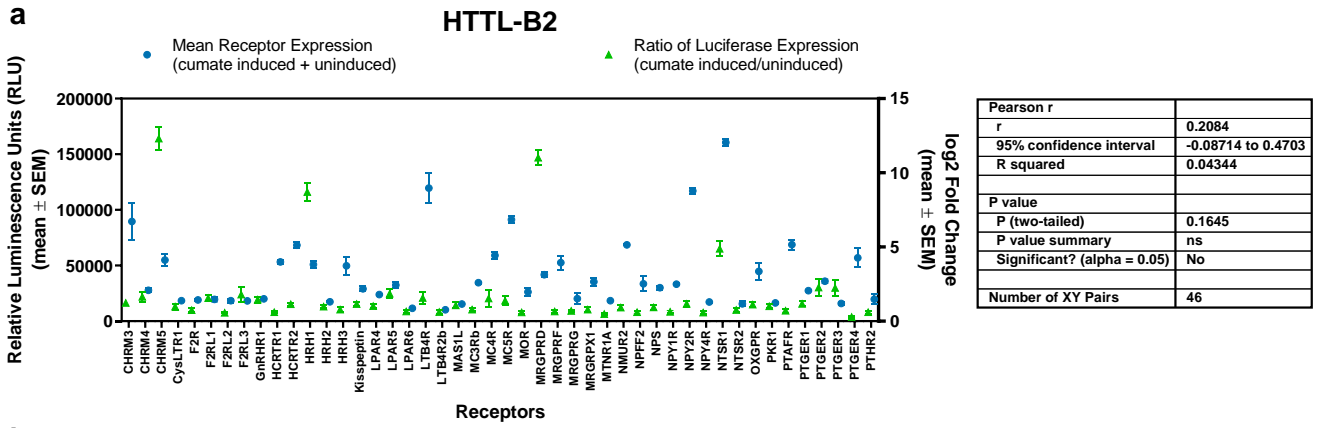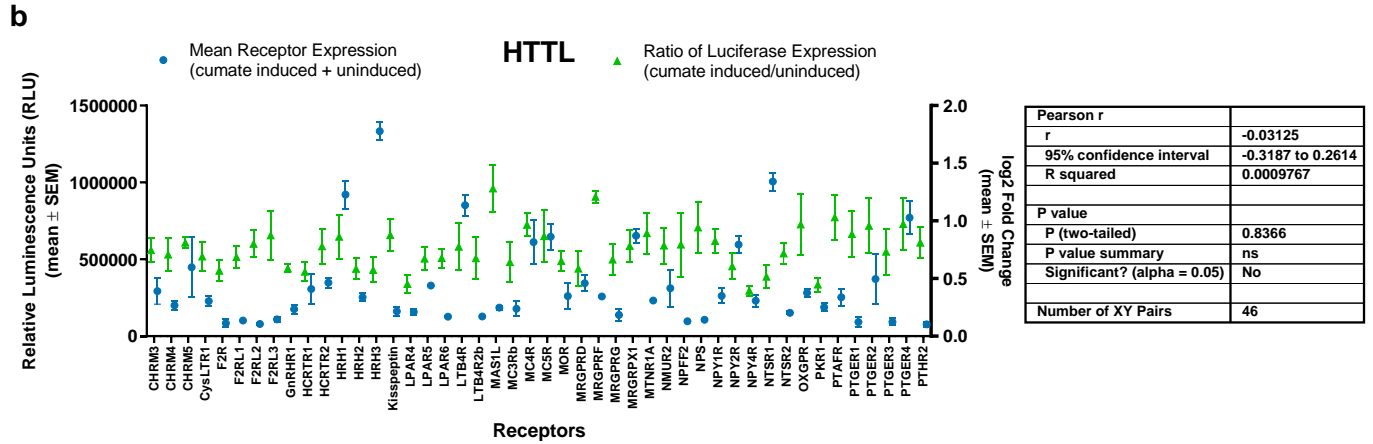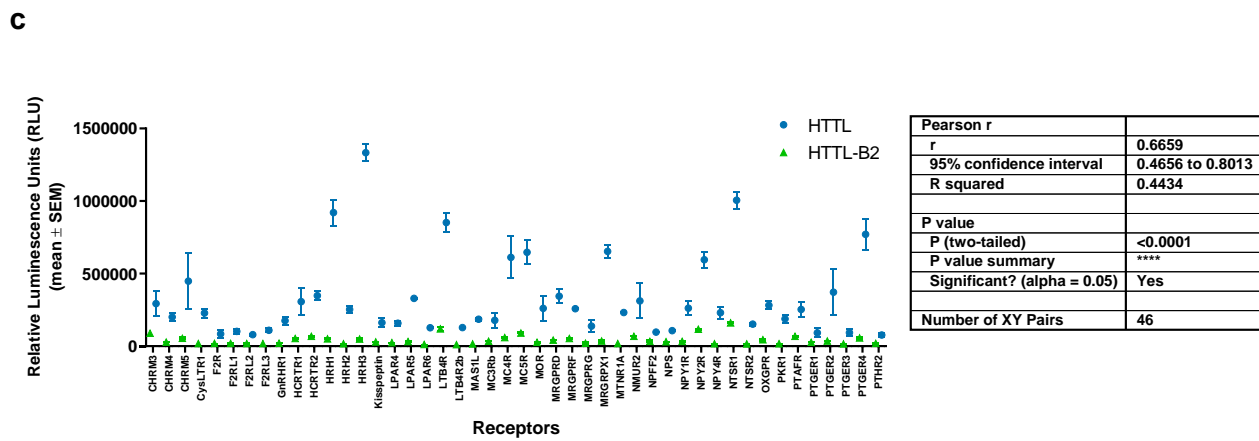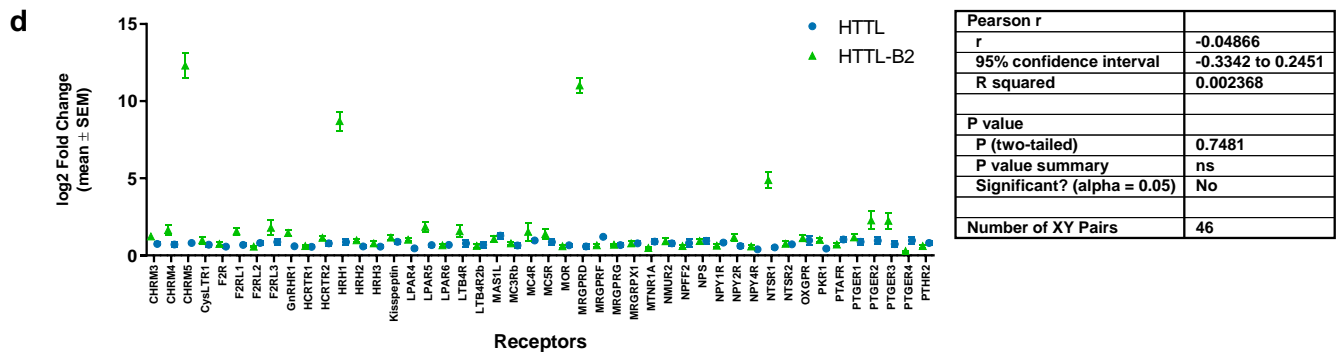



**Supplementary Figure 5. Comparison of receptor expression and constitutive activity across panel of GPCRs.** HTTL-B2 (a) and HTTL (b) were plated in the presence or absence of cumate (30  $\mu\text{g/mL}$ ) and were transfected with a panel of GPCRs with a varying range of constitutive activities. ELISA experiments were subsequently carried out on transfected cells to determine receptor surface expression, and log<sub>2</sub> fold changes in constitutive arrestin recruitment were calculated between the wells in the absence or presence of cumate. Mean receptor expression (c) and log<sub>2</sub> fold changes in constitutive arrestin recruitment (d) were also compared between the HTTL and HTTL-B2 cell lines. Pearson correlation coefficients ( $r$ ) and corresponding  $p$  values (two-tailed) were computed between data sets using GraphPad Prism. Data are presented as mean values, with error bars representing SEM ( $n = 4$ , with four technical replicates from one biological sample). Generic receptor codes refer to the GPCR-Tango constructs.

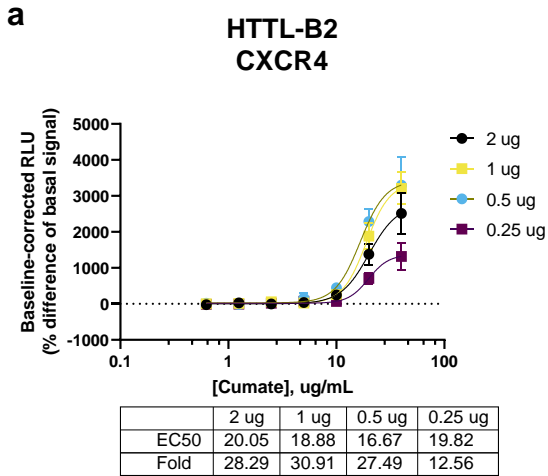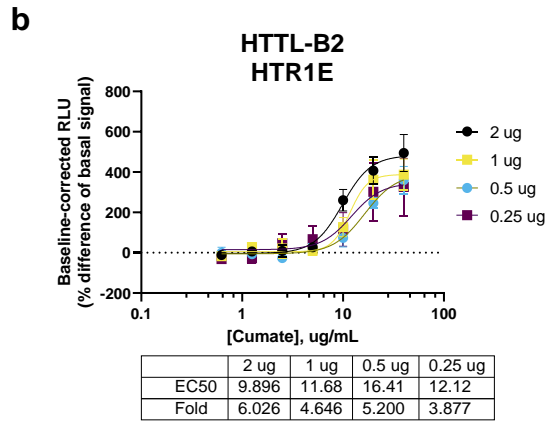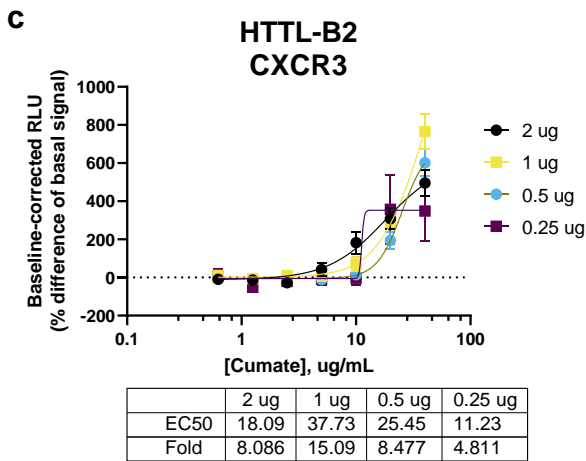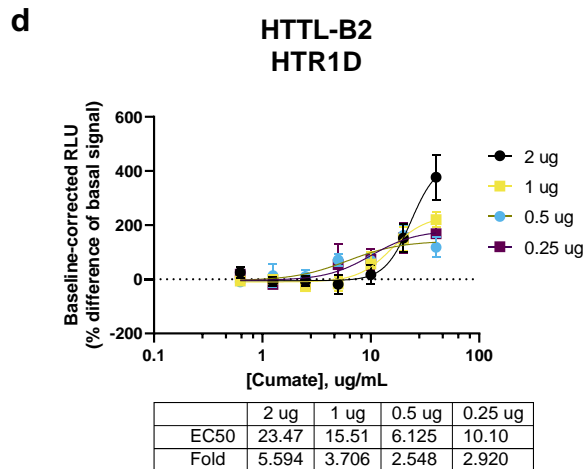

**Supplementary Figure 6. Titration of GPCR Tango DNA and consequent effects on constitutive activity.** HTTL-B2 cells were seeded in 6-well plates and transfected with various amount of CXCR4 (a), HTR1E (b), CXCR3 (c), and HTR1D (d) Tango DNA, ranging from 0.25 ug – 2 ug total per well. Transfected cells were stimulated with cumate, and dose- response curves were built using XY analysis for non-linear regression curve and the 4-parameters dose-response stimulation function, followed by baseline correction. Data are presented as mean values, with error bars representing SEM (n = 3, with three technical replicates from one biological sample). Generic receptor codes refer to the GPCR-Tango constructs.

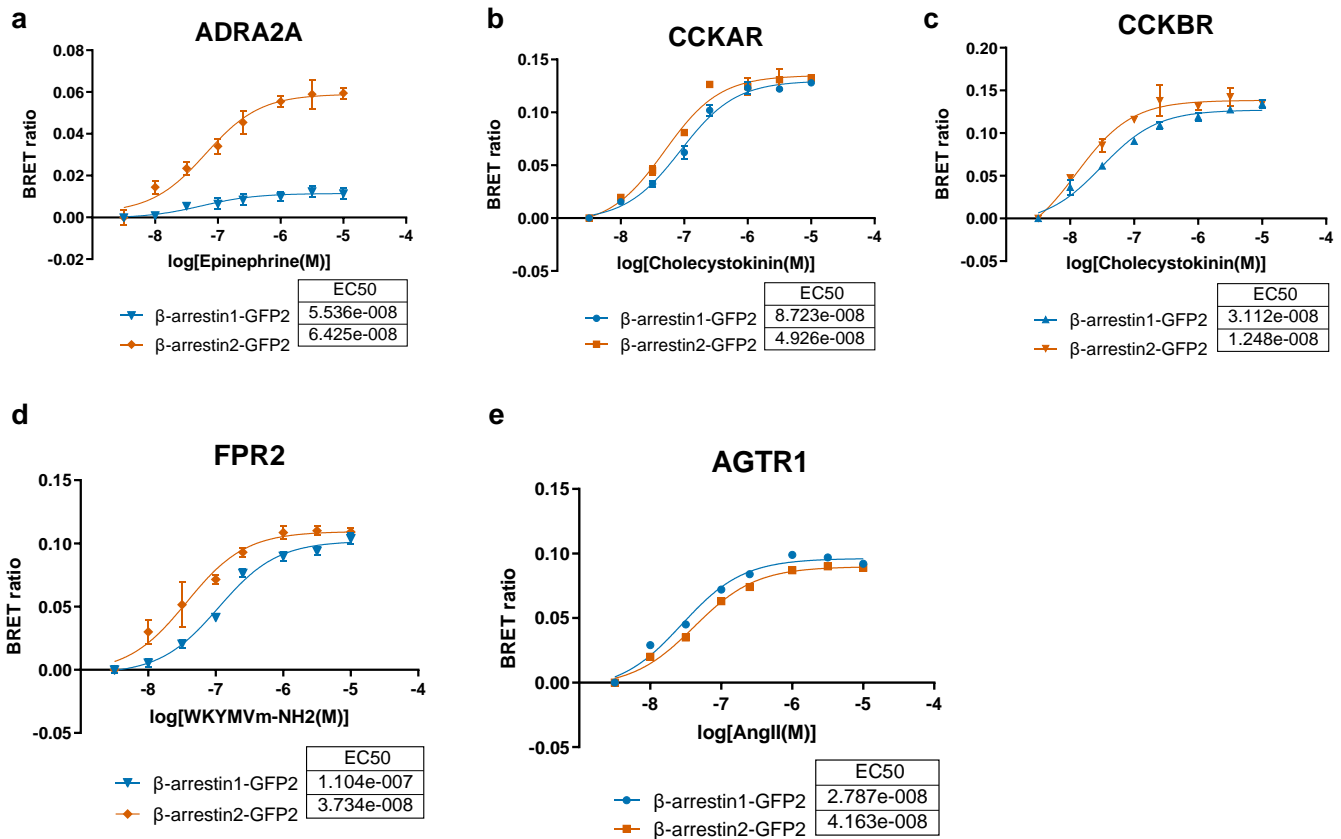

**Supplementary Figure 7. Orthogonal determination of arrestin isoform selectivity using BRET2.** HEK293T cells were transfected with  $\beta$ -arrestin1/2-GFP2, as well as the following GPCRs: ADRA2A (a), CCKAR (b), CCKBR (c), FPR2 (d), AGTR1 (e). Following transfection, cells were stimulated with serial dilutions of selective agonist, and read with 405 nm (RLuc8-Coelenterazine 400a) and 500 nm (GFP2) emission filters. Dose- response curves were built using XY analysis for non-linear regression curve and the 3-parameters dose-response stimulation function, followed by baseline correction. Data are presented as mean values, with error bars representing SEM (n = 2, with two technical replicates from one biological sample). Generic receptor codes refer to the GPCR-Rluc8 constructs.

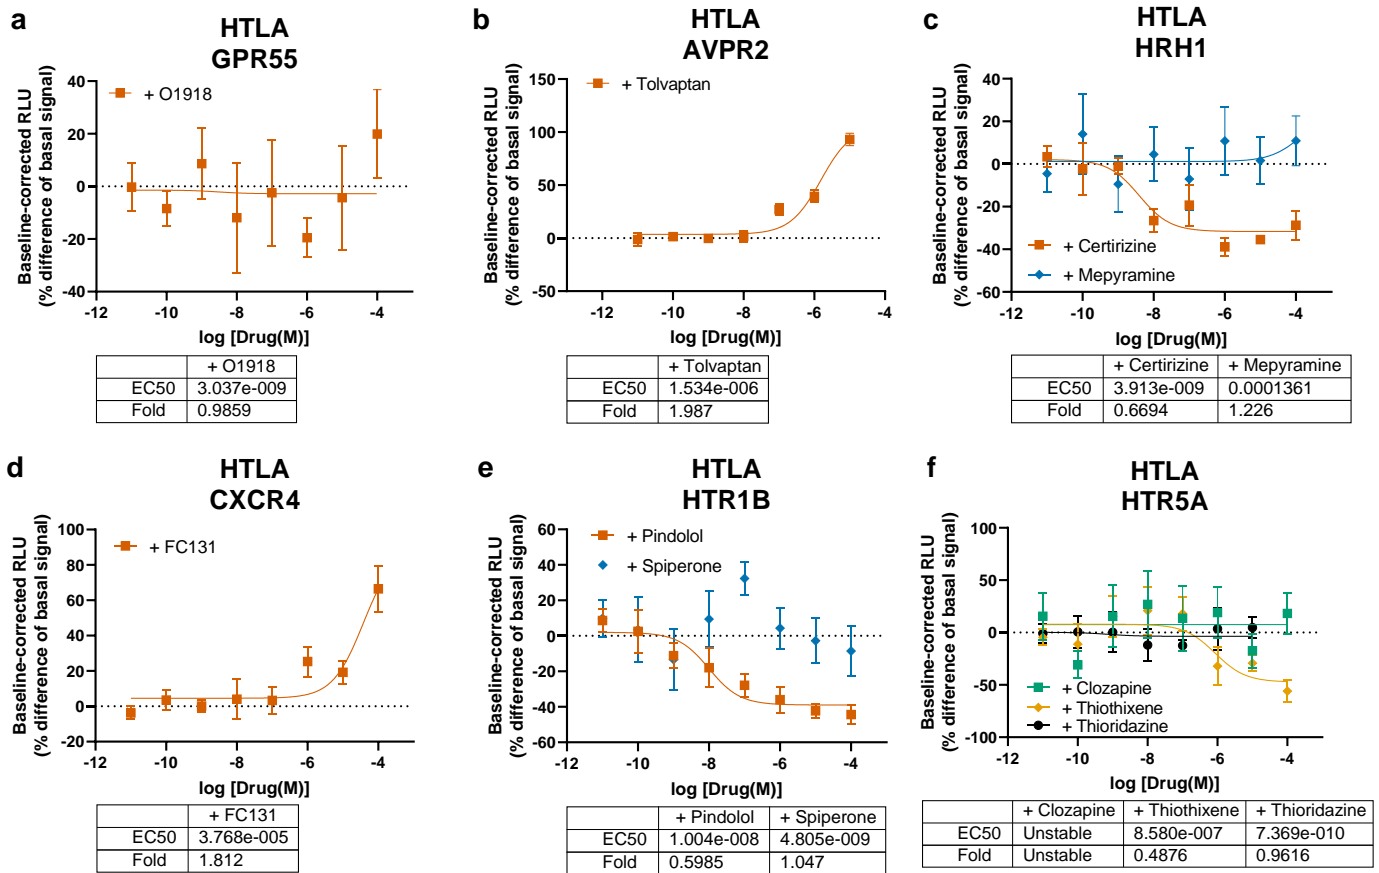

**Supplementary Figure 8. Orthogonal characterization of select inverse agonists and antagonists using PRESTO-Tango.** HTLA cells were transfected with GPCRs exhibiting strong constitutive arrestin recruitment from the primary Tango-Trio screen, serving to validate the findings shown in Figure 7. Transfected cells were stimulated with a dose-response curve using the following inverse agonists/antagonists: O-1918 at GPR55 (a), Tolvaptan at AVPR2 (b), Cetirizine and Mepyramine at HRH1 (c), FC131 at CXCR4 (d), Pindolol and Spiperone at HTR1E (e), and Clozapine, Thiothexene, and Thioridazine at HTR5A (f). Stimulation curves were built using XY analysis for non-linear regression curve and the 3-parameters dose-response stimulation function, followed by baseline correction. Data are presented as mean values, with error bars representing SEM (Supplementary Figs 8a, 8c-f: n = 3, with three technical replicates from one biological sample; Supplementary Fig 8b: n = 6, with three technical replicates from two biological samples). Generic receptor codes refer to the GPCR-Tango constructs.

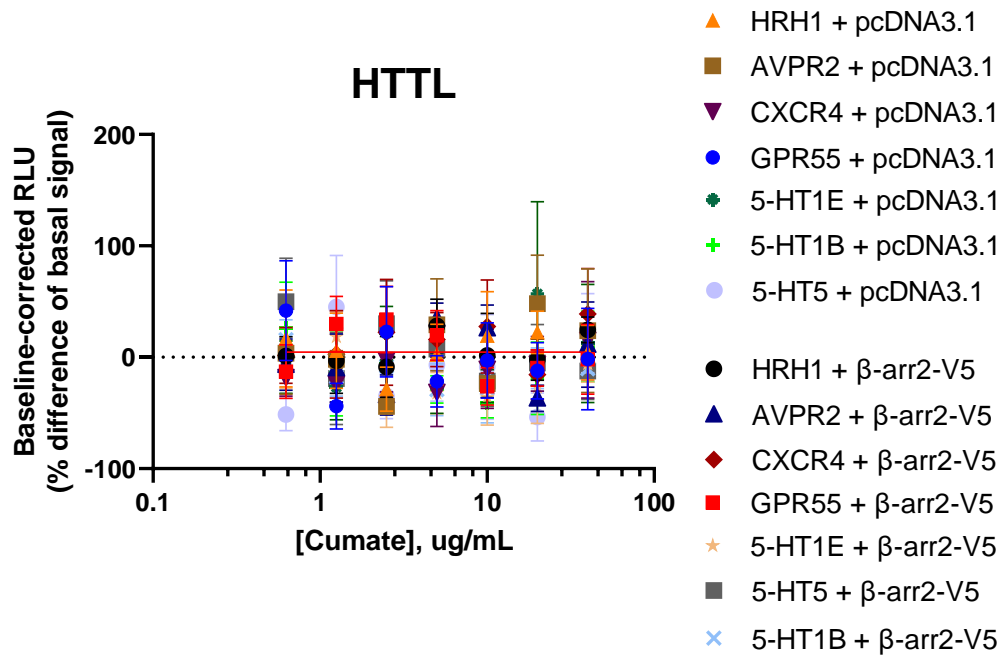

**Supplementary Figure 9. Expression of GPCR-Tango constructs in the absence of TEV protease.** HTTL cells were co-transfected with select GPCR constructs (tested with antagonists/inverse agonists from Fig 7), and either  $\beta$ -arrestin-2 (not tagged to TEV protease) or pcDNA3.1 as a control. Transfected cells were stimulated as a cumate dose-response, and stimulation curves were built using XY analysis for non-linear regression curve and the 4-parameters dose-response stimulation function, followed by baseline correction. Data are presented as mean values, with error bars representing SEM (n = 3, with three technical replicates from one biological sample). Generic receptor codes refer to the GPCR-Tango constructs.

**a**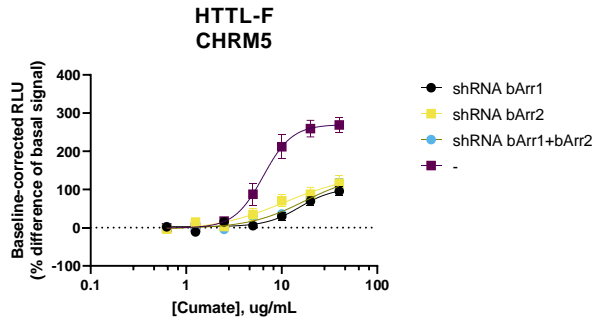

|                   | EC50  | logEC50 | Span   | Fold  |
|-------------------|-------|---------|--------|-------|
| shRNA bArr1       | 15.38 | 1.187   | 459303 | 1.993 |
| shRNA bArr2       | 10.60 | 1.025   | 669083 | 2.622 |
| shRNA bArr1+bArr2 | 17.20 | 1.236   | 564353 | 2.461 |
| -                 | 6.405 | 0.8065  | 139806 | 3.725 |

**b**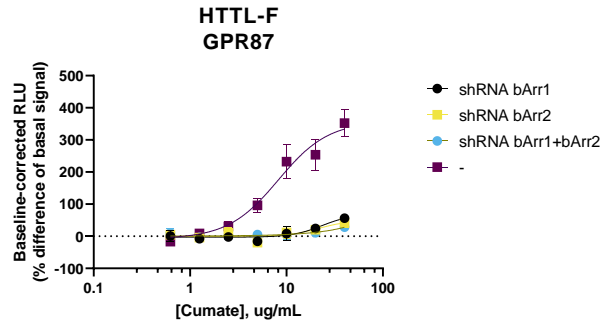

|                   | EC50   | logEC50 | Span     | Fold     |
|-------------------|--------|---------|----------|----------|
| shRNA bArr1       | 23.39  | 1.369   | 30849    | 1.744    |
| shRNA bArr2       | 21.66  | 1.336   | 29759    | 1.513    |
| shRNA bArr1+bArr2 | 557592 | 5.746   | Unstable | Unstable |
| -                 | 8.221  | 0.9149  | 48577    | 4.983    |

**c**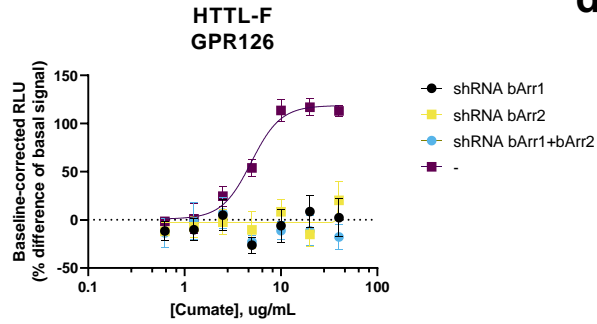

|                   | EC50  | logEC50 | Span     | Fold     |
|-------------------|-------|---------|----------|----------|
| shRNA bArr1       | 3.069 | 0.4871  | 30035    | 1.651    |
| shRNA bArr2       | 42.20 | 1.625   | Unstable | Unstable |
| shRNA bArr1+bArr2 | 3.419 | 0.5339  | 21766    | 1.486    |
| -                 | 4.921 | 0.6920  | 38098    | 2.169    |

**d**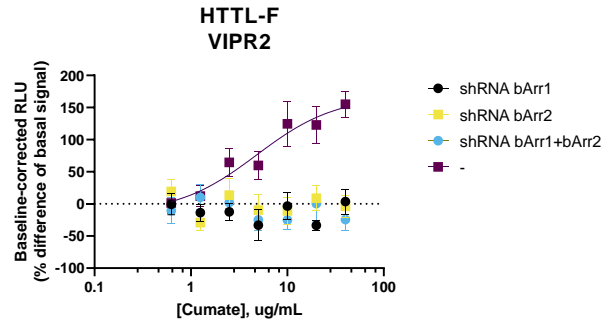

|                   | EC50  | logEC50 | Span  | Fold  |
|-------------------|-------|---------|-------|-------|
| shRNA bArr1       | 8.957 | 0.9522  | 63180 | 1.713 |
| shRNA bArr2       | 4.508 | 0.6540  | 46960 | 1.685 |
| shRNA bArr1+bArr2 | 3.386 | 0.5297  | 43671 | 1.472 |
| -                 | 4.821 | 0.6831  | 57025 | 3.172 |

**e**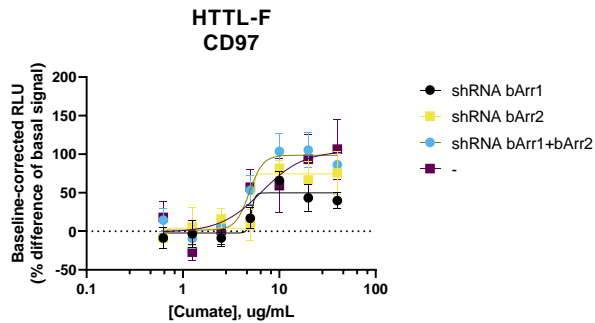

|                   | EC50  | logEC50 | Span  | Fold  |
|-------------------|-------|---------|-------|-------|
| shRNA bArr1       | 5.126 | 0.7098  | 59654 | 1.532 |
| shRNA bArr2       | 5.352 | 0.7285  | 71885 | 1.678 |
| shRNA bArr1+bArr2 | 4.878 | 0.6883  | 94061 | 1.956 |
| -                 | 6.606 | 0.8200  | 67253 | 2.072 |

**f**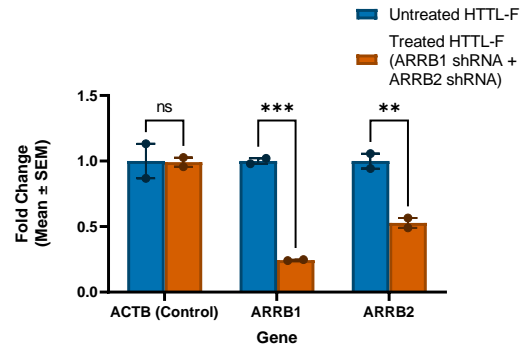

|                          | ACTB (Control) | ARRB1    | ARRB2    |
|--------------------------|----------------|----------|----------|
| P value                  | 0.930008       | 0.000147 | 0.001847 |
| Mean of Untreated HTTL-F | 1.000          | 1.000    | 1.000    |
| Mean of Column B         | 0.9918         | 0.2444   | 0.5285   |
| Difference               | 0.008163       | 0.7556   | 0.4715   |
| SE of difference         | 0.08913        | 0.08913  | 0.08913  |
| t ratio                  | 0.09159        | 8.477    | 5.290    |
| df                       | 6.000          | 6.000    | 6.000    |
| Adjusted P Value         | 0.930008       | 0.000442 | 0.003691 |

**Supplementary Figure 10. Internalization of GPCRs in HTTL-F following  $\beta$ -arrestin-1 and  $\beta$ -arrestin-2 knockdown.** Lentiviral  $\beta$ -arrestin-1 and -2 shRNA plasmids were transfected in HEK293T cells, along with psPAX2 and VSV-G vectors. The medium was replaced the following day with complete fresh medium, and lentiviral shRNA medium was collected following 48 hours transfection. For the knockdown experiment, HTTL-F cells were seeded in either complete medium or in the previously prepared lentiviral  $\beta$ -arrestin-1 and -2 shRNA medium (combined at a 1:1 ratio), with infection of cells facilitated with polybrene at 8  $\mu$ g/mL. HTTL-F cells were transfected with GPCRs demonstrating high constitutive internalization: CHRM5 (a), GPR87 (b), GPR126 (c), VIPR2 (d), and CD97 (e). Transfected cells were stimulated as a cumate dose-response, and stimulation curves were built using XY analysis for non-linear regression curve and the 4-parameters dose-response stimulation function, followed by baseline correction. Data are presented as mean values, with error bars representing SEM (n = 3, with three technical replicates from one biological sample), and generic receptor codes refer to the GPCR-Tango constructs. qPCR was performed on untreated and infected HTTL-F cells to confirm sufficient knockdown of  $\beta$ -arrestin-1 and -2 (f). Data are presented as mean values, with error bars representing SEM. Fold change of gene expression and corresponding p values (two-tailed) were assessed with multiple unpaired t test using the FDR method of Benjamini & Yekutieli (n = 2, with two technical replicates from one biological sample).

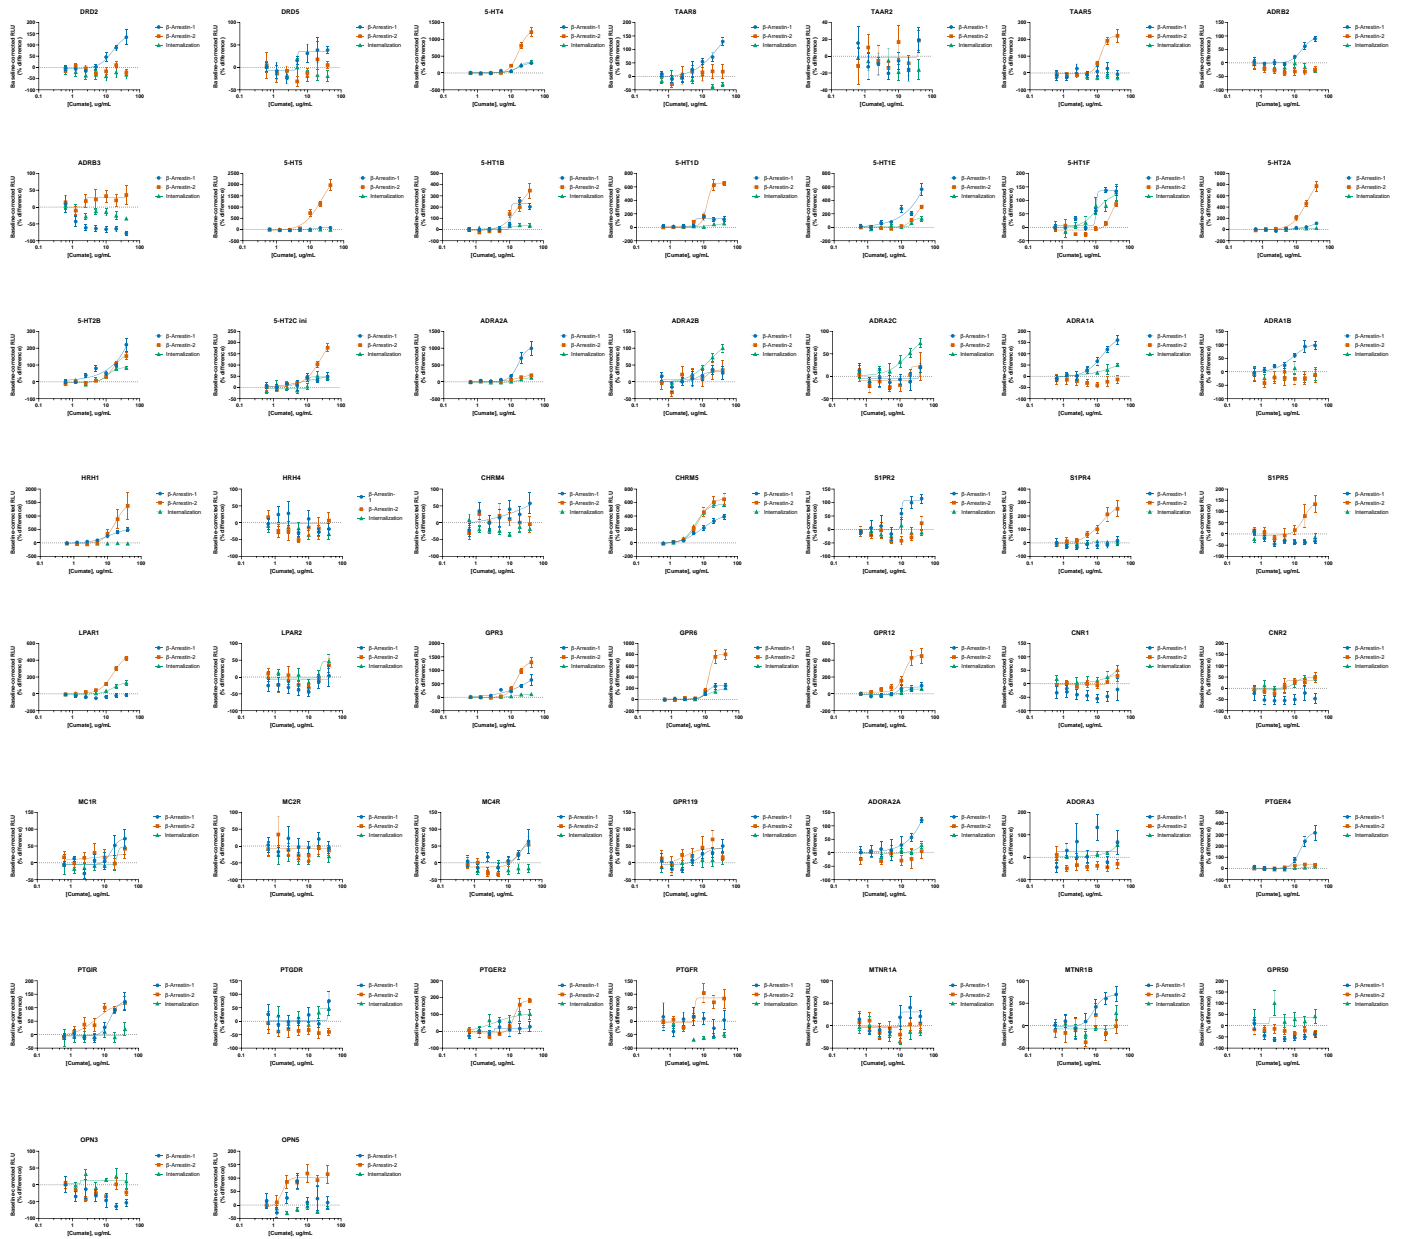

**Supplementary Figure 11. Basal profiles of  $\beta$ -arrestin-1 and  $\beta$ -arrestin-2 translocation, and receptor internalization generated using Tango-Trio (Class A,  $\alpha$ -branch).** To profile basal activities, HTTL-B1, HTTL-B2 and HTTL-F cells were transfected with GPCR Tango constructs. Transfected cells were stimulated with cumate in a dose-dependent manner. Dose-response curves were built using XY analysis for non-linear regression curve and the 4-parameters dose-response stimulation function, followed by baseline correction. Data are presented as mean values, with error bars representing SEM ( $n = 3$ , with 3 technical replicates from one biological sample). Generic receptor codes refer to the GPCR-Tango constructs.



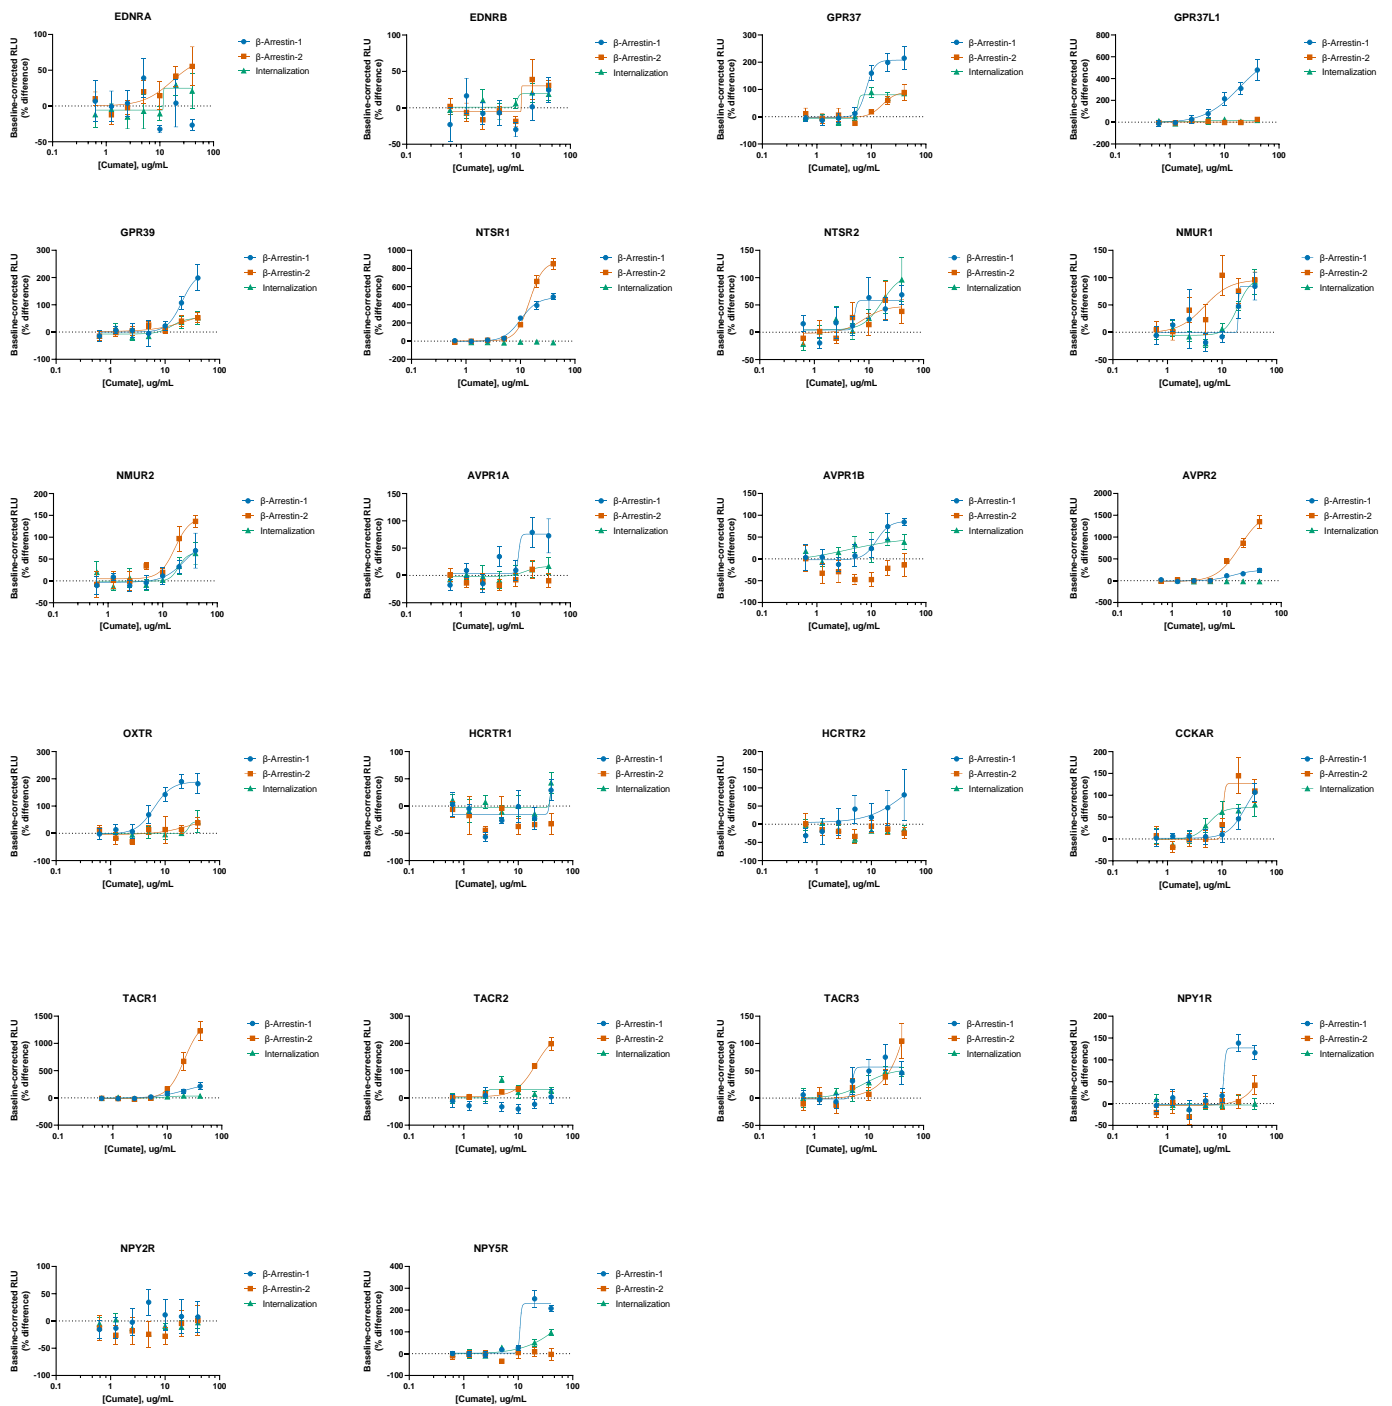

**Supplementary Figure 12. Basal profiles of  $\beta$ -arrestin-1 and  $\beta$ -arrestin-2 translocation, and receptor internalization generated using Tango-Trio (Class A,  $\beta$ -branch).** To profile basal activities, HTTL-B1, HTTL-B2 and HTTL-F cells were transfected with GPCR Tango constructs. Transfected cells were stimulated with cumate in a dose-dependent manner. Dose-response curves were built using XY analysis for non-linear regression curve and the 4-parameters dose-response stimulation function, followed by baseline correction. Data are presented as mean values, with error bars representing SEM (n = 3, with 3 technical replicates from one biological sample). Generic receptor codes refer to the GPCR-Tango constructs.

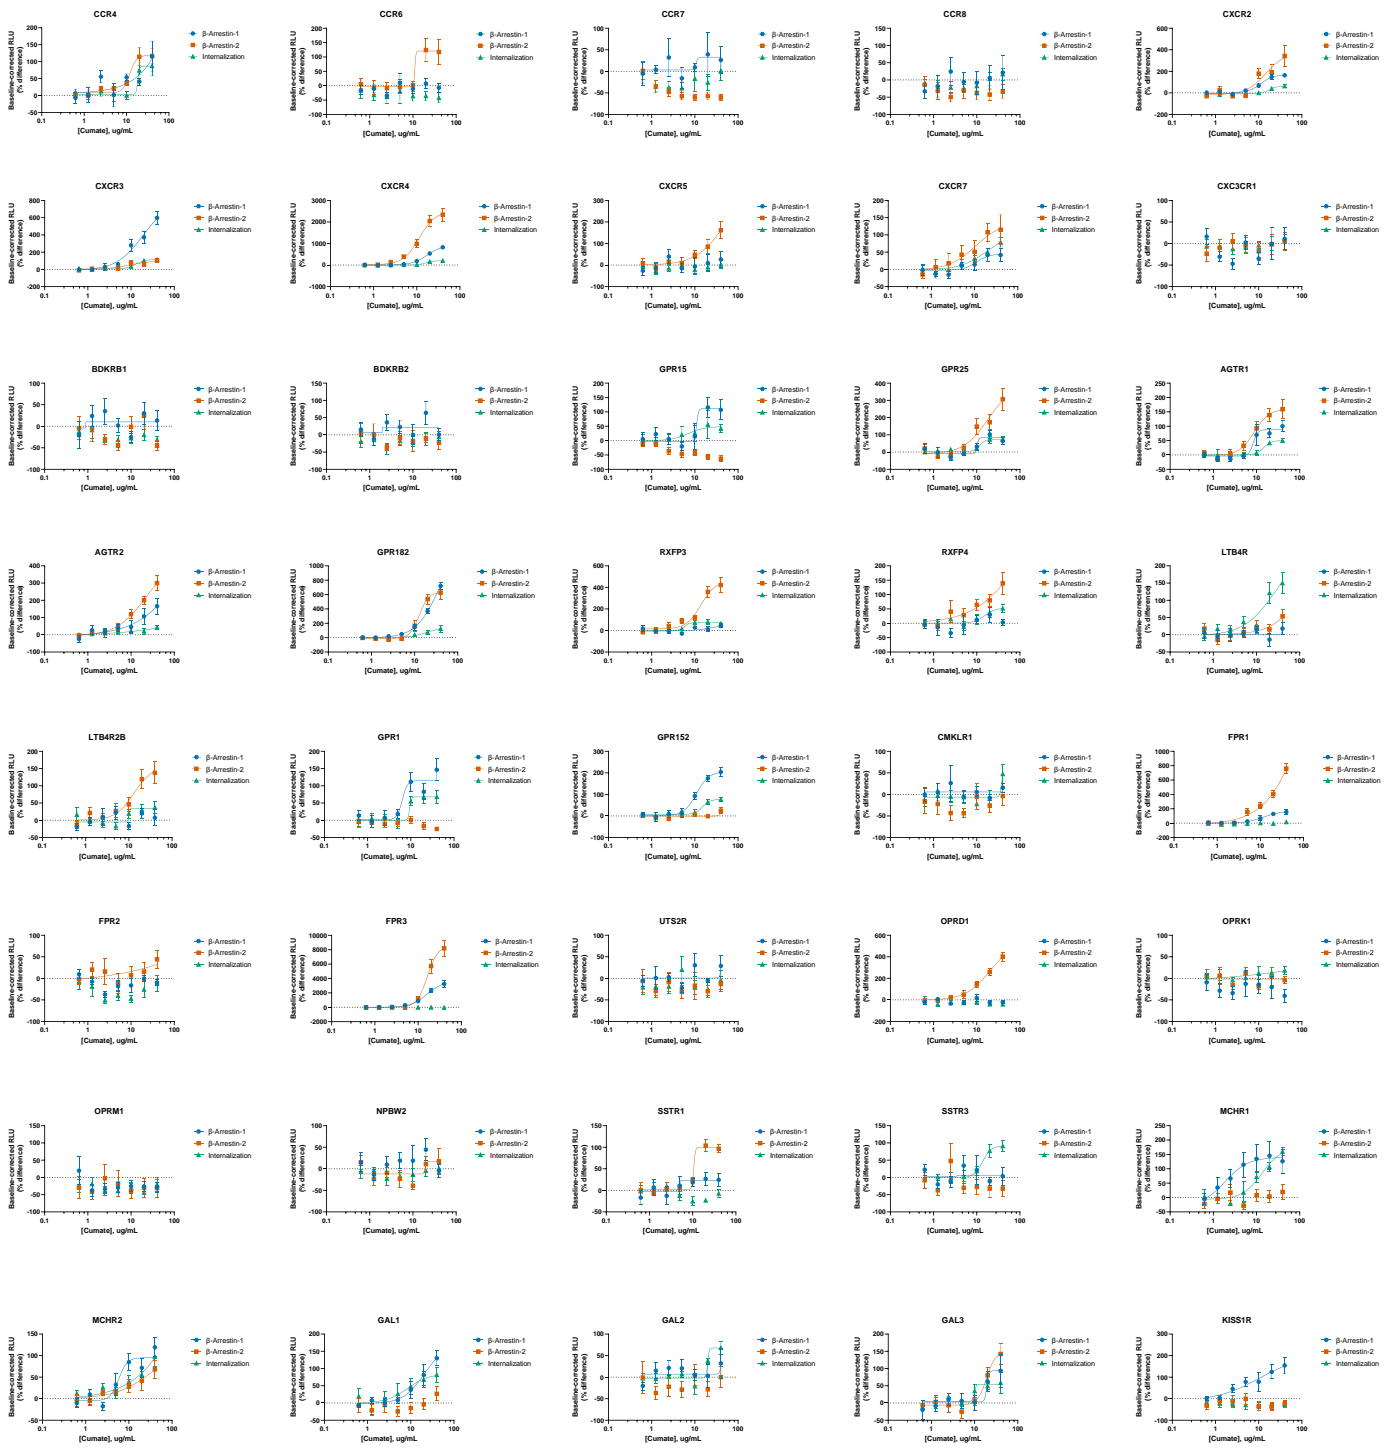

**Supplementary Figure 13. Basal profiles of  $\beta$ -arrestin-1 and  $\beta$ -arrestin-2 translocation, and receptor internalization generated using Tango-Trio (Class A,  $\gamma$ -branch).** To profile basal activities, HTTL-B1, HTTL-B2 and HTTL-F cells were transfected with GPCR Tango constructs. Transfected cells were stimulated with cumate in a dose-dependent manner. Dose-response curves were built using XY analysis for non-linear regression curve and the 4-parameters dose-response stimulation function, followed by baseline correction. Data are presented as mean values, with error bars representing SEM (n = 3, with 3 technical replicates from one biological sample). Generic receptor codes refer to the GPCR-Tango constructs.

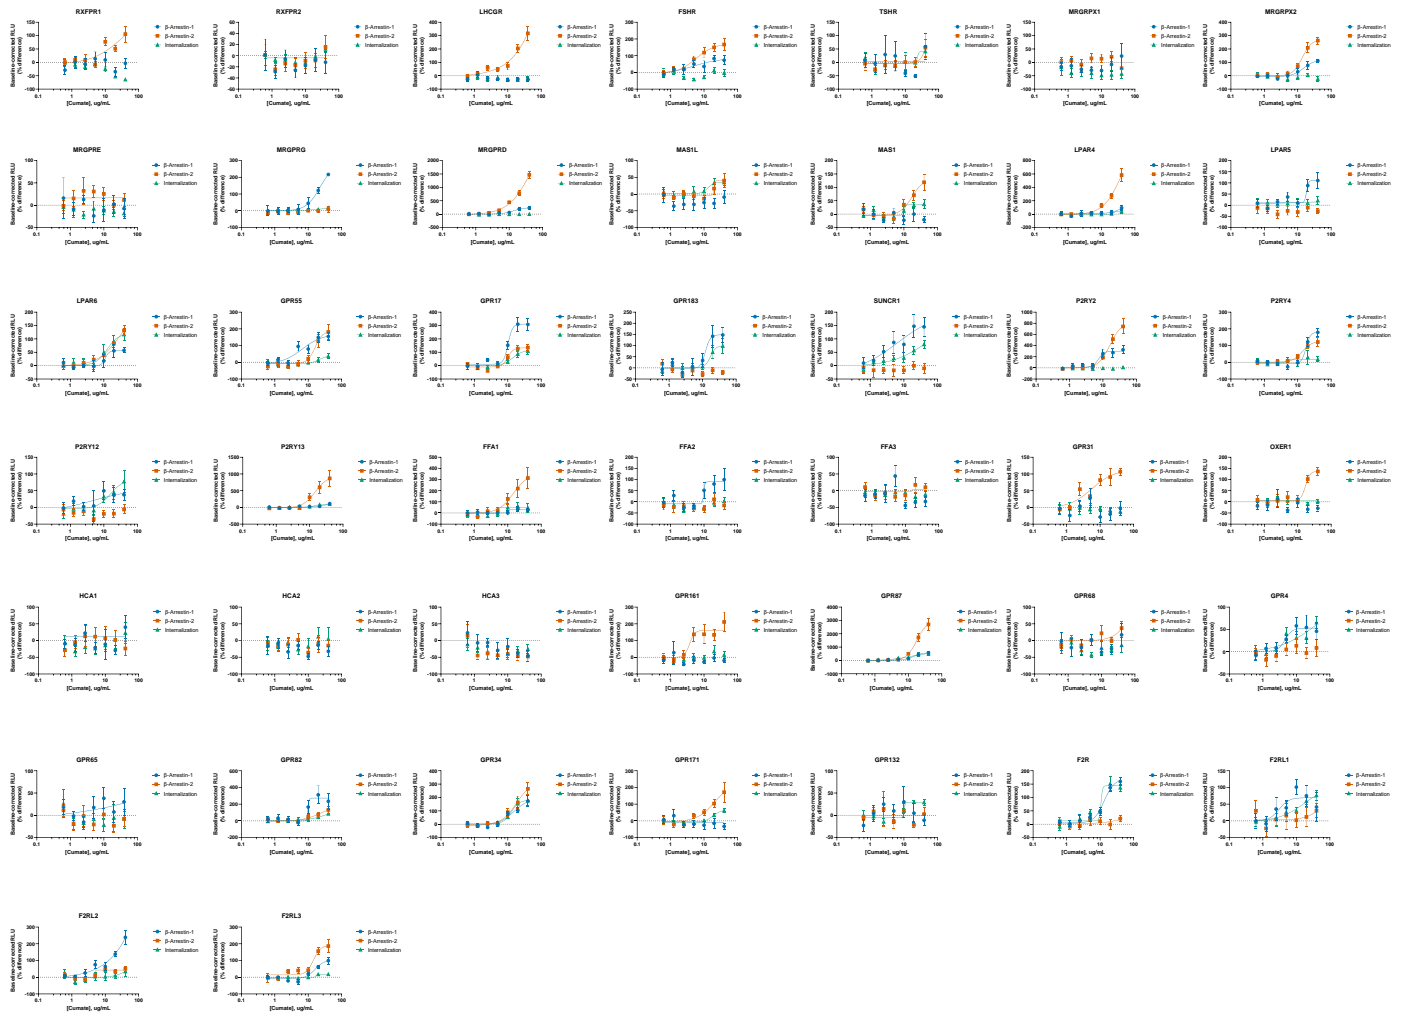

**Supplementary Figure 14. Basal profiles of  $\beta$ -arrestin-1 and  $\beta$ -arrestin-2 translocation, and receptor internalization generated using Tango-Trio (Class A,  $\delta$ -branch).** To profile basal activities, HTTL-B1, HTTL-B2 and HTTL-F cells were transfected with GPCR Tango constructs. Transfected cells were stimulated with cumate in a dose-dependent manner. Dose-response curves were built using XY analysis for non-linear regression curve and the 4-parameters dose-response stimulation function, followed by baseline correction. Data are presented as mean values, with error bars representing SEM ( $n = 3$ , with 3 technical replicates from one biological sample). Generic receptor codes refer to the GPCR-Tango constructs.

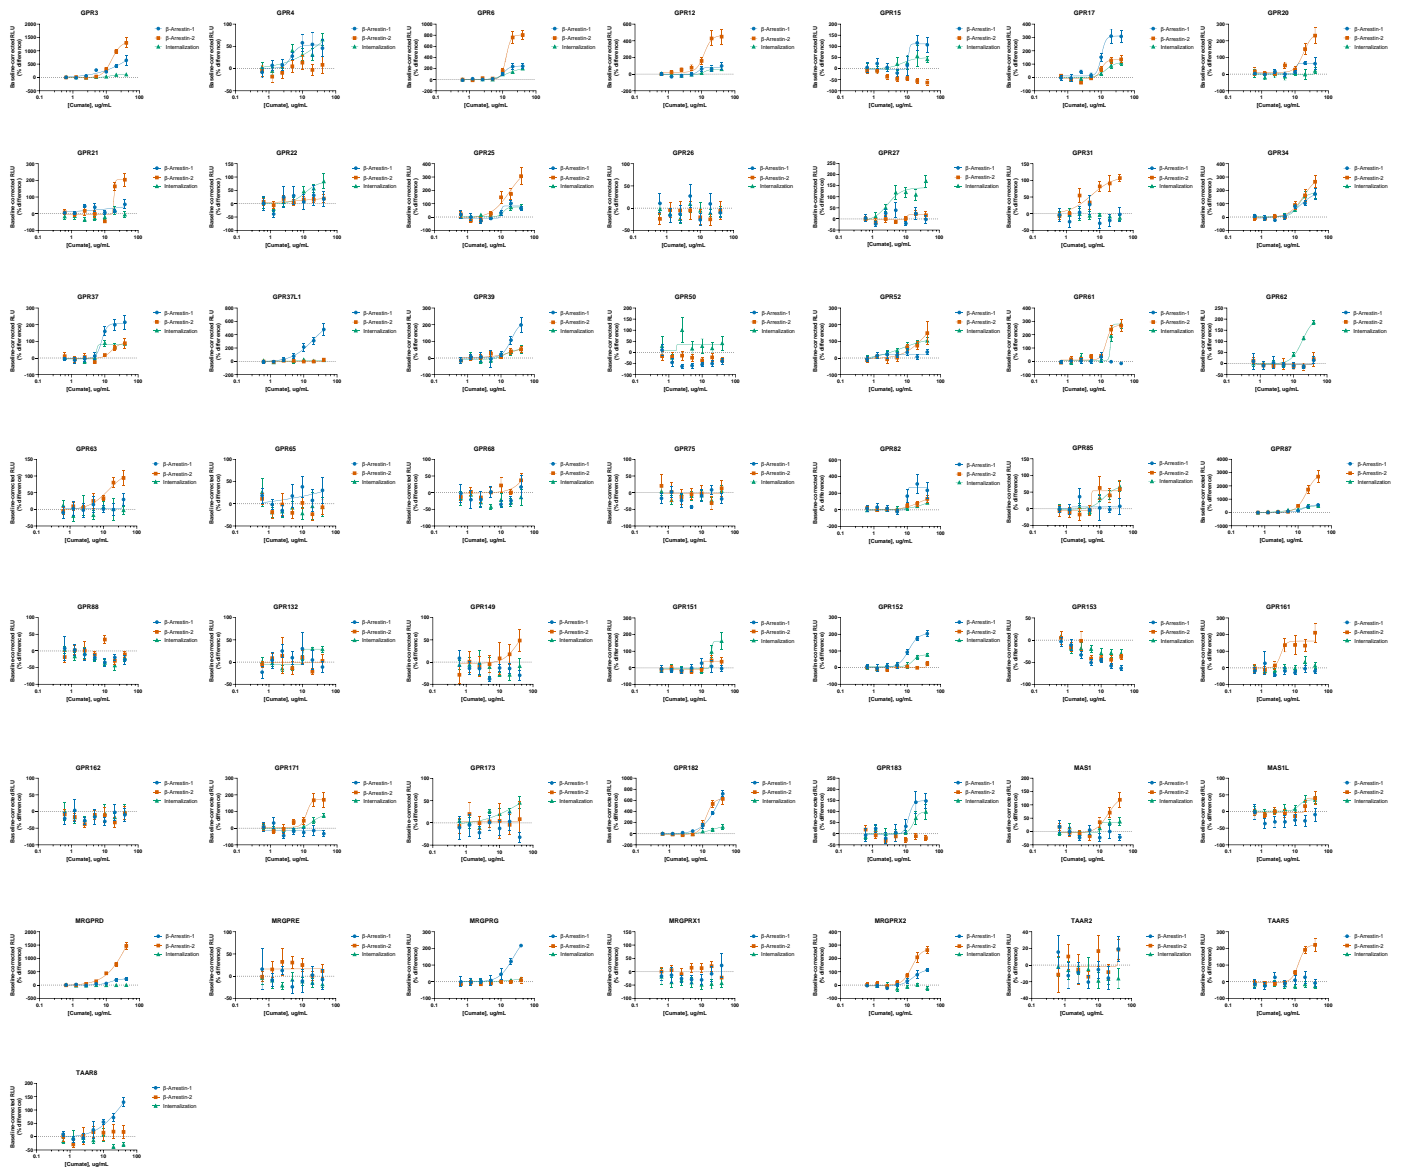

**Supplementary Figure 15. Basal profiles of  $\beta$ -arrestin-1 and  $\beta$ -arrestin-2 translocation, and receptor internalization generated using Tango-Trio (Class A, orphan receptors).** To profile basal activities, HTTL-B1, HTTL-B2 and HTTL-F cells were transfected with GPCR Tango constructs. Transfected cells were stimulated with cumate in a dose-dependent manner. Dose-response curves were built using XY analysis for non-linear regression curve and the 4-parameters dose-response stimulation function, followed by baseline correction. Data are presented as mean values, with error bars representing SEM ( $n = 3$ , with 3 technical replicates from one biological sample). Generic receptor codes refer to the GPCR-Tango constructs.

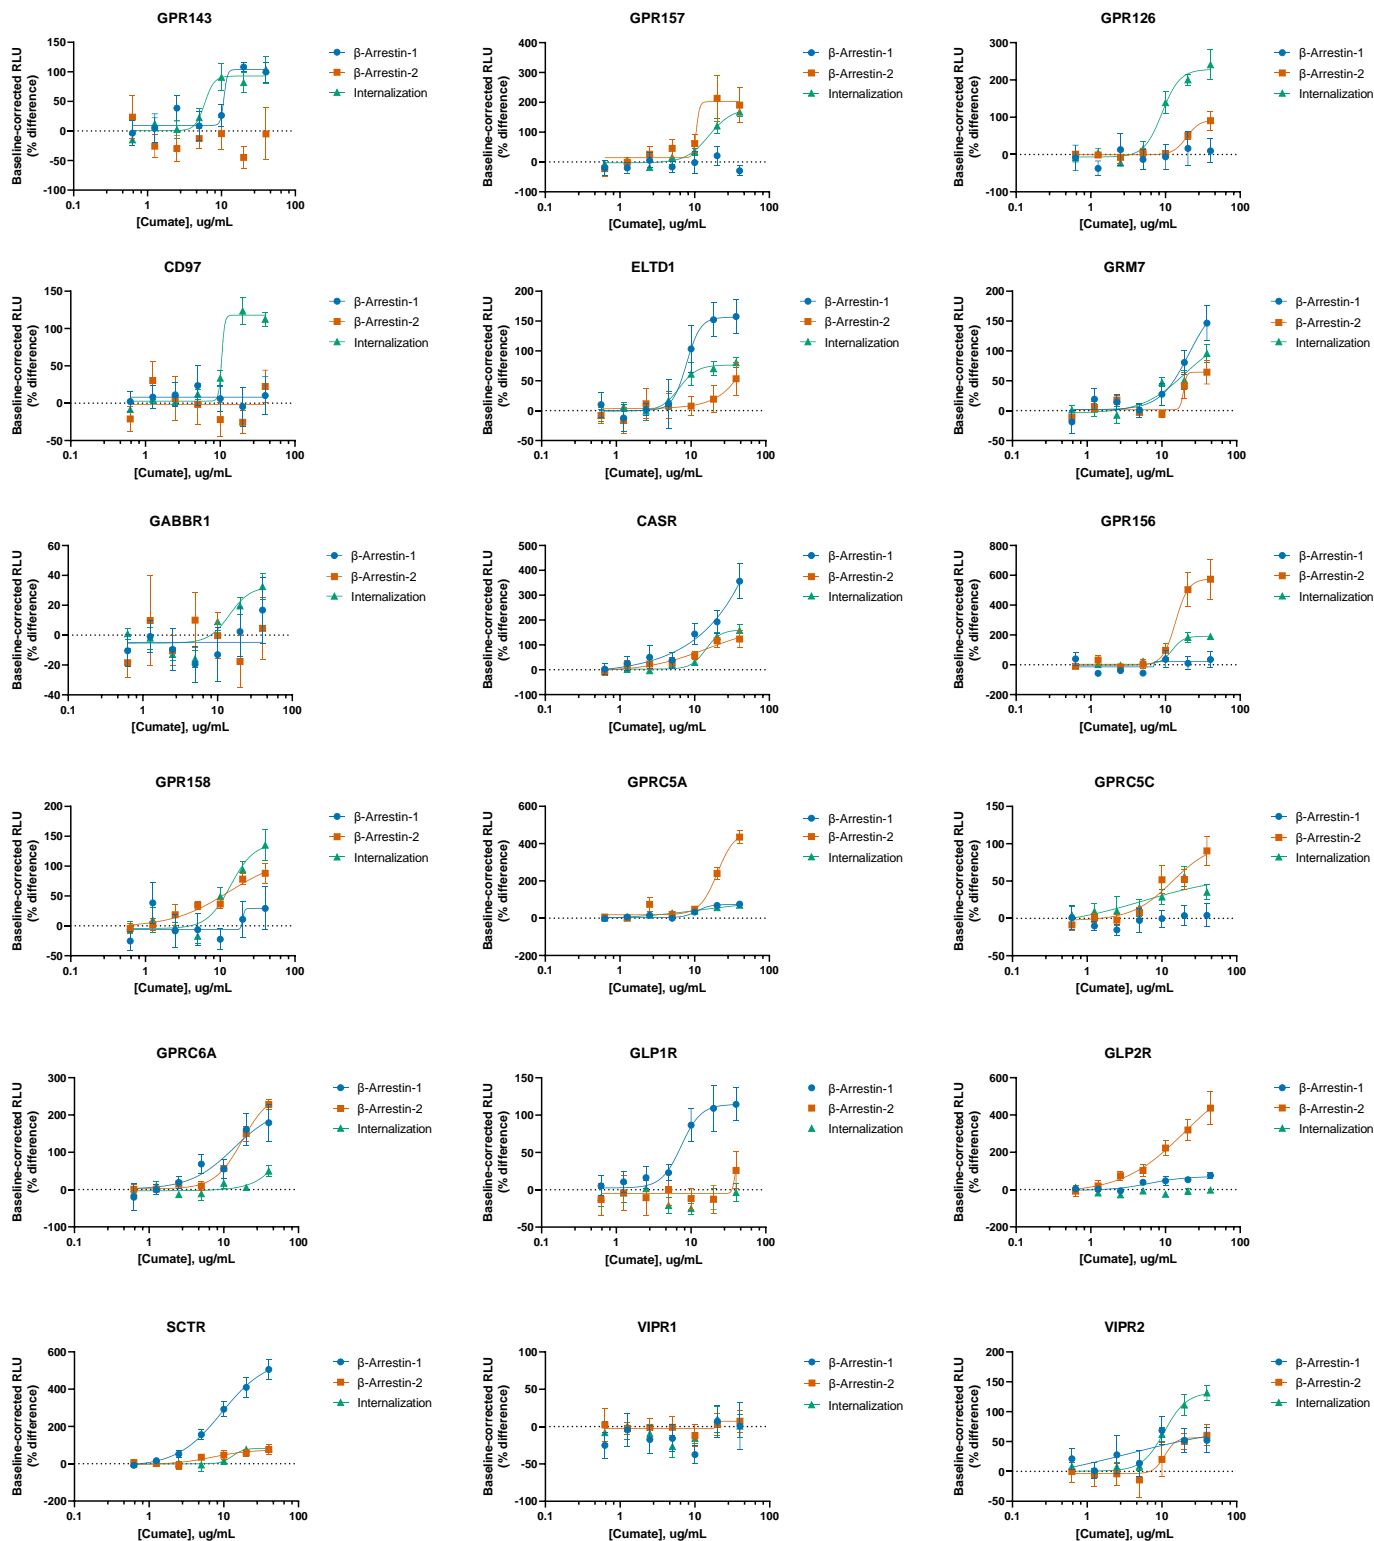

**Supplementary Figure 16. Basal profiles of  $\beta$ -arrestin-1 and  $\beta$ -arrestin-2 translocation, and receptor internalization generated using Tango-Trio (Class B/C).** To profile basal activities, HTTL-B1, HTTL-B2 and HTTL-F cells were transfected with GPCR Tango constructs. Transfected cells were stimulated with cumate in a dose-dependent manner. Dose-response curves were built using XY analysis for non-linear regression curve and the 4-parameters dose-response stimulation function, followed by baseline correction. Data are presented as mean values, with error bars representing SEM (n = 3, with 3 technical replicates from one biological sample). Generic receptor codes refer to the GPCR-Tango constructs.

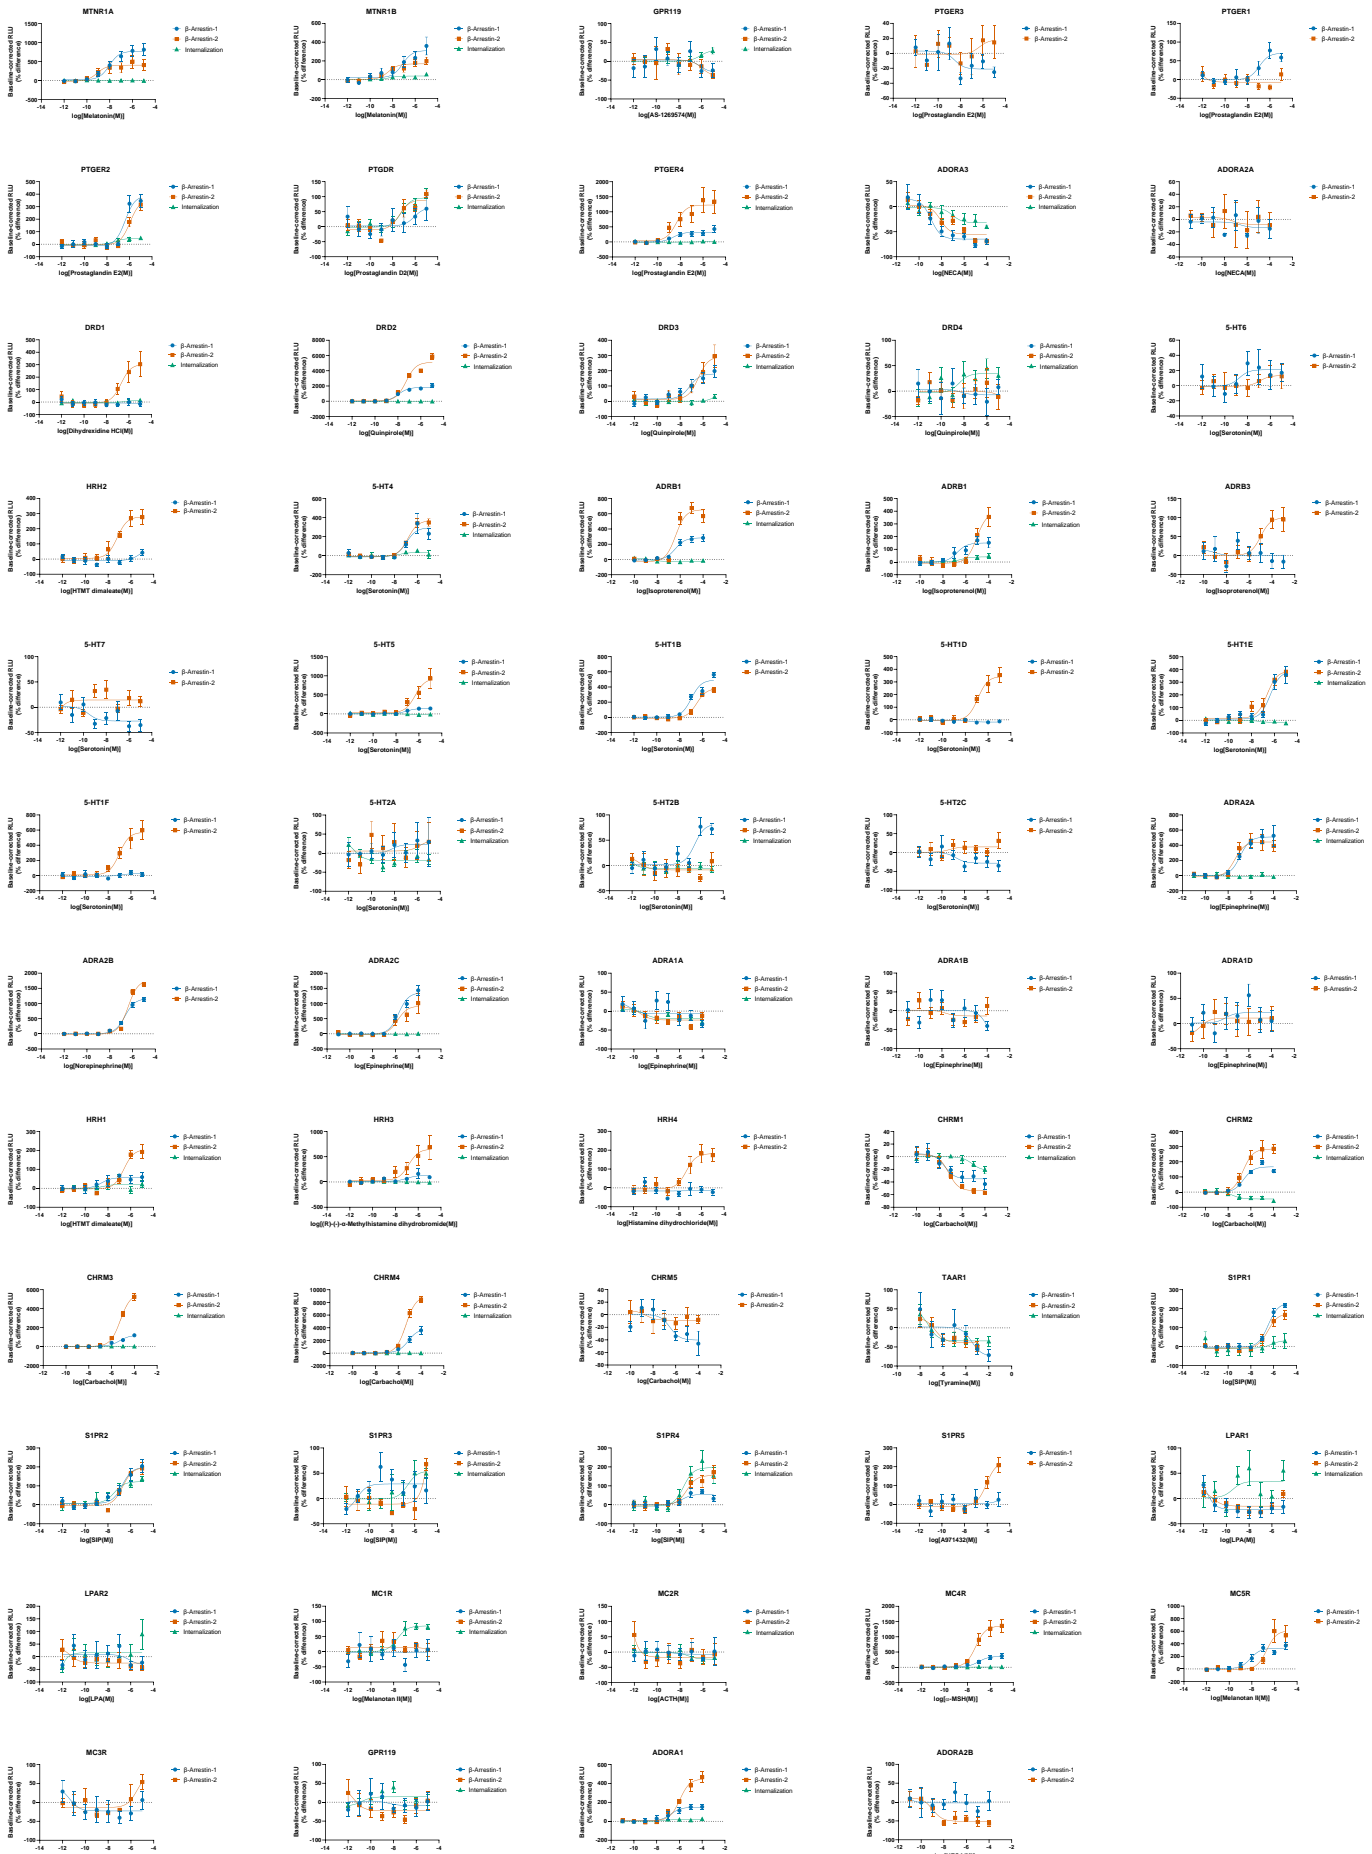

**Supplementary Figure 17. Agonist-induced profiles of  $\beta$ -arrestin-1 and  $\beta$ -arrestin-2 translocation, and receptor internalization generated using Tango-Trio (Class A,  $\alpha$ -branch).** To quantify agonist-dependent activities, HTTL-B1, HTTL-B2 and HTTL-F cells were plated in cumate-containing (30  $\mu$ g/mL) medium and transfected with non-orphan GPCR Tango constructs. Transfected cells were stimulated with the receptor-specific agonist, and dose-response curves were built using XY analysis for non-linear regression curve and the 3-parameters dose-response stimulation function, followed by baseline correction. Data are presented as mean values, with error bars representing SEM (n = 3, with 3 technical replicates from one biological sample). Generic receptor codes refer to the GPCR-Tango constructs.

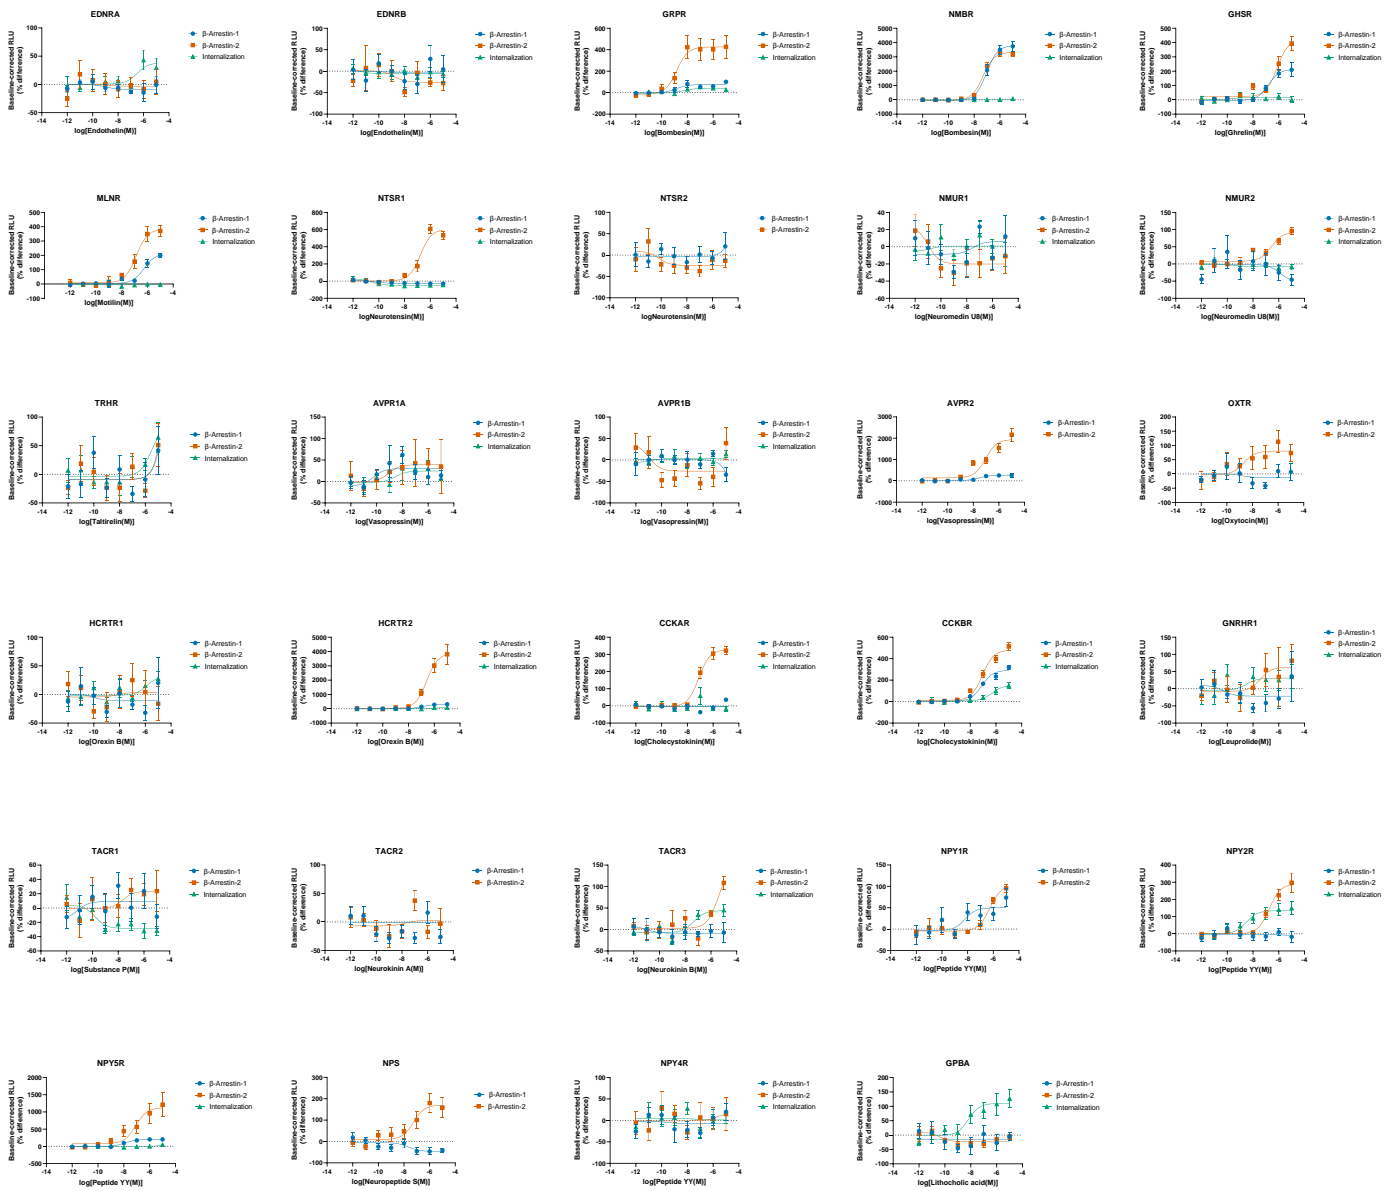

**Supplementary Figure 18. Agonist-induced profiles of  $\beta$ -arrestin-1 and  $\beta$ -arrestin-2 translocation, and receptor internalization generated using Tango-Trio (Class A,  $\beta$ -branch).** To quantify agonist-dependent activities, HTTL-B1, HTTL-B2 and HTTL-F cells were plated in cumate-containing (30  $\mu$ g/mL) medium and transfected with non-orphan GPCR Tango constructs. Transfected cells were stimulated with the receptor-specific agonist, and dose-response curves were built using XY analysis for non-linear regression curve and the 3-parameters dose-response stimulation function, followed by baseline correction. Data are presented as mean values, with error bars representing SEM (n = 3, with 3 technical replicates from one biological sample). Generic receptor codes refer to the GPCR-Tango constructs.



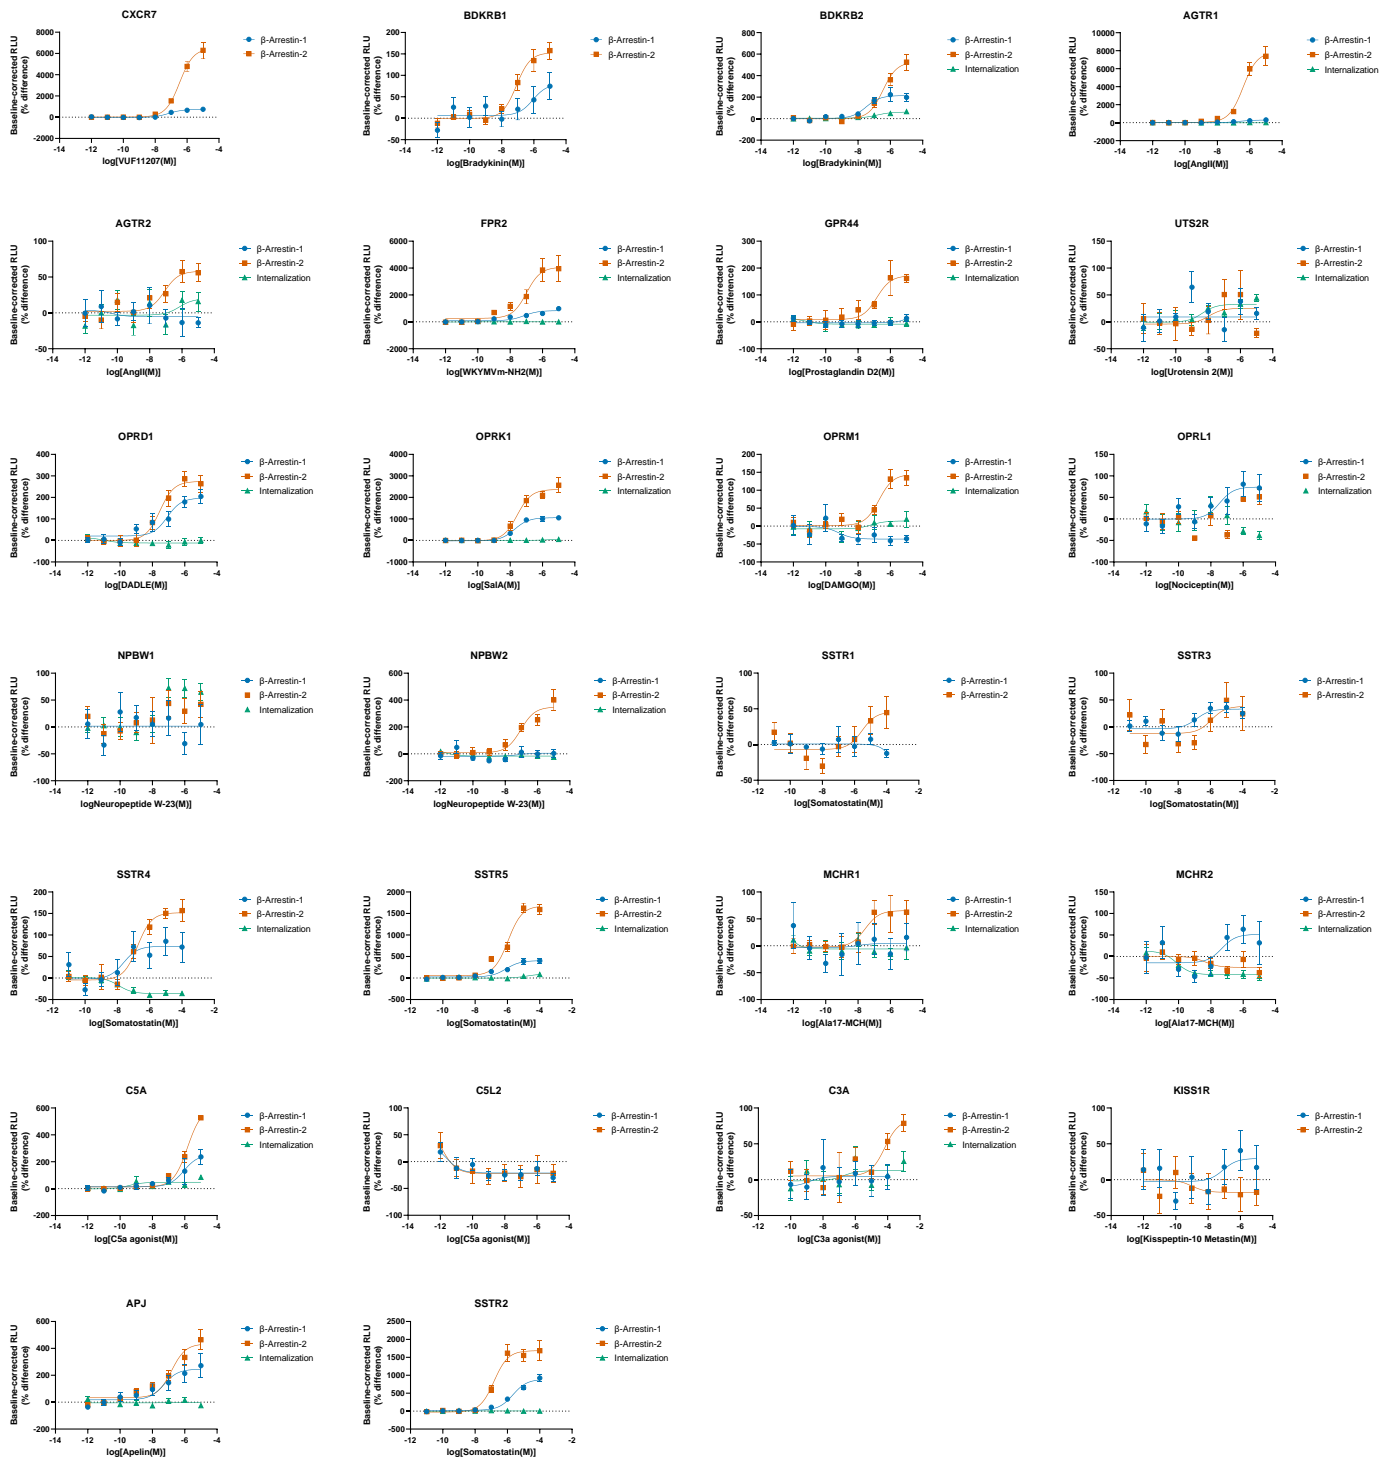

**Supplementary Figure 19. Agonist-induced profiles of  $\beta$ -arrestin-1 and  $\beta$ -arrestin-2 translocation, and receptor internalization generated using Tango-Trio (Class A,  $\gamma$ -branch).** To quantify agonist-dependent activities, HTTL-B1, HTTL-B2 and HTTL-F cells were plated in cumate-containing (30  $\mu$ g/mL) medium and transfected with non-orphan GPCR Tango constructs. Transfected cells were stimulated with the receptor-specific agonist, and dose-response curves were built using XY analysis for non-linear regression curve and the 3-parameters dose-response stimulation function, followed by baseline correction. Data are presented as mean values, with error bars representing SEM (n = 3, with 3 technical replicates from one biological sample). Generic receptor codes refer to the GPCR-Tango constructs.

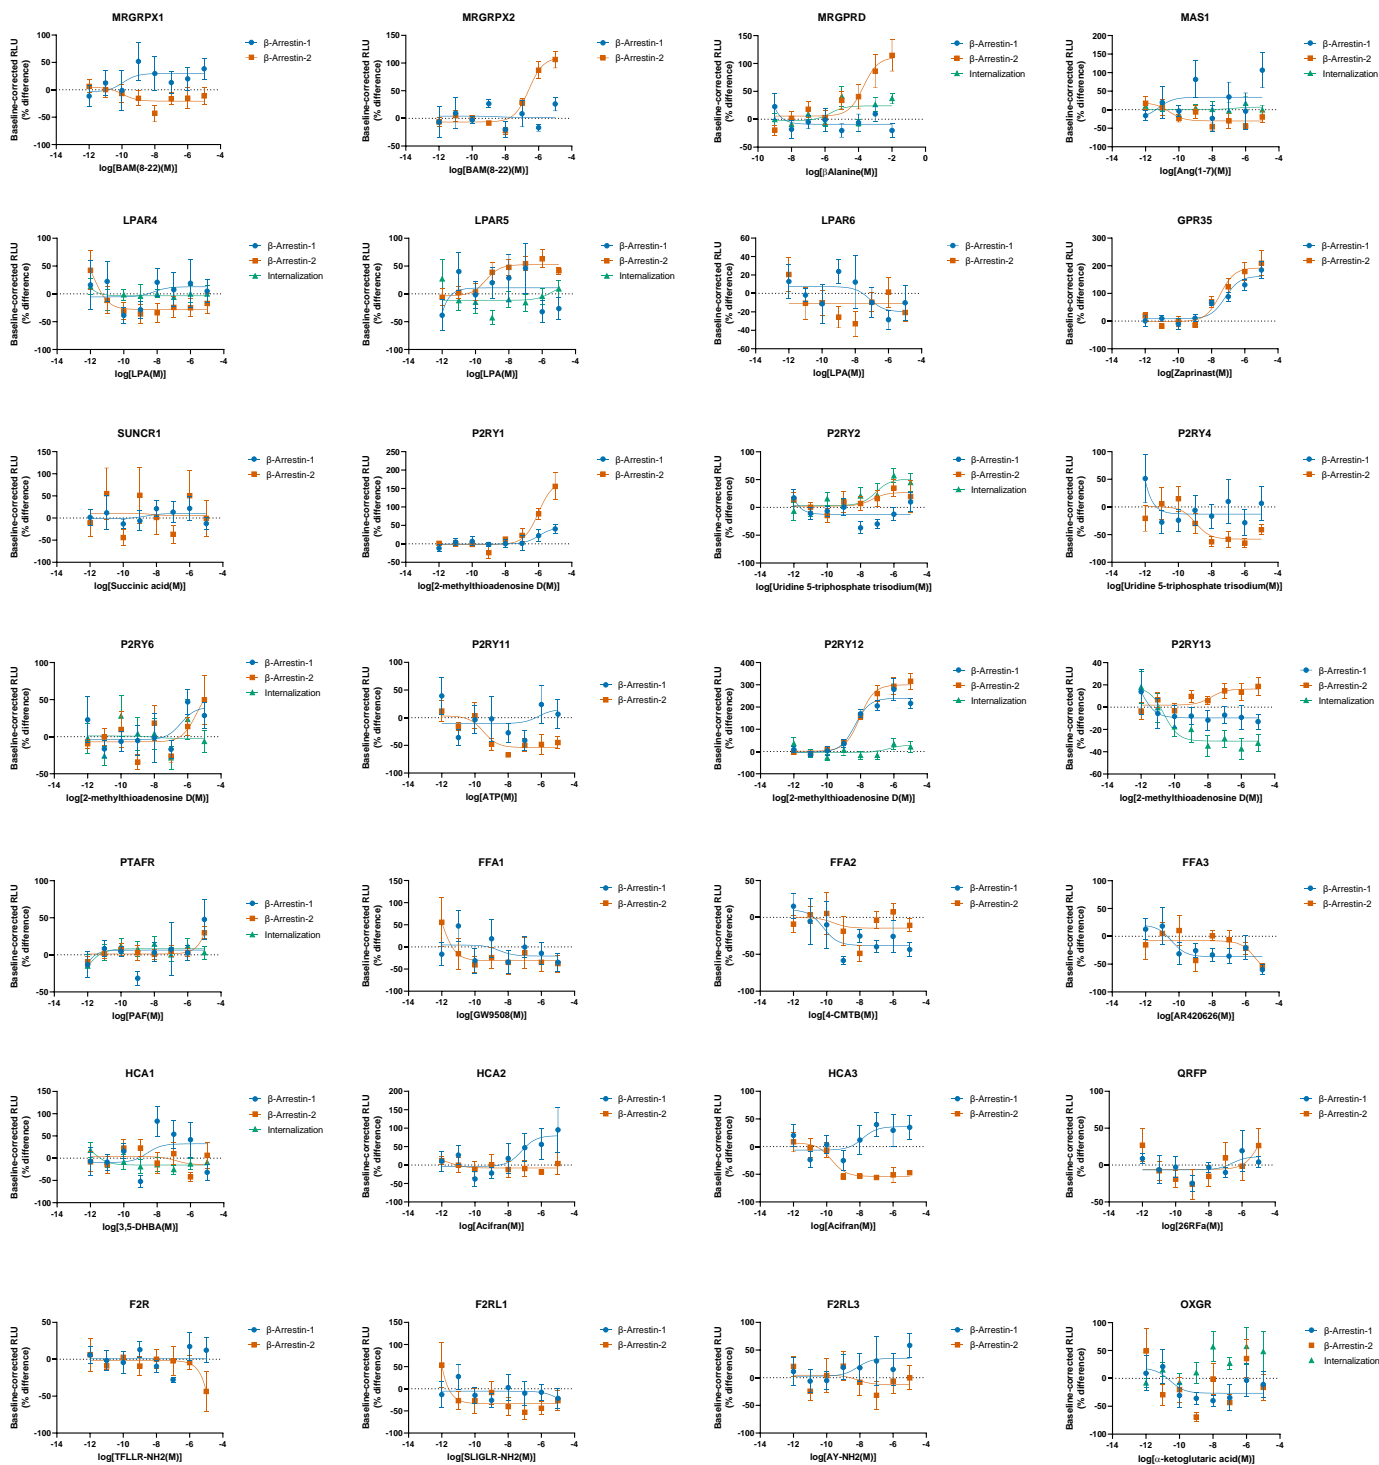

**Supplementary Figure 20. Agonist-induced profiles of  $\beta$ -arrestin-1 and  $\beta$ -arrestin-2 translocation, and receptor internalization generated using Tango-Trio (Class A,  $\delta$ -branch).** To quantify agonist-dependent activities, HTTL-B1, HTTL-B2 and HTTL-F cells were plated in cumate-containing (30  $\mu$ g/mL) medium and transfected with non-orphan GPCR Tango constructs. Transfected cells were stimulated with the receptor-specific agonist, and dose-response curves were built using XY analysis for non-linear regression curve and the 3-parameters dose-response stimulation function, followed by baseline correction. Data are presented as mean values, with error bars representing SEM (n = 3, with 3 technical replicates from one biological sample). Generic receptor codes refer to the GPCR-Tango constructs.

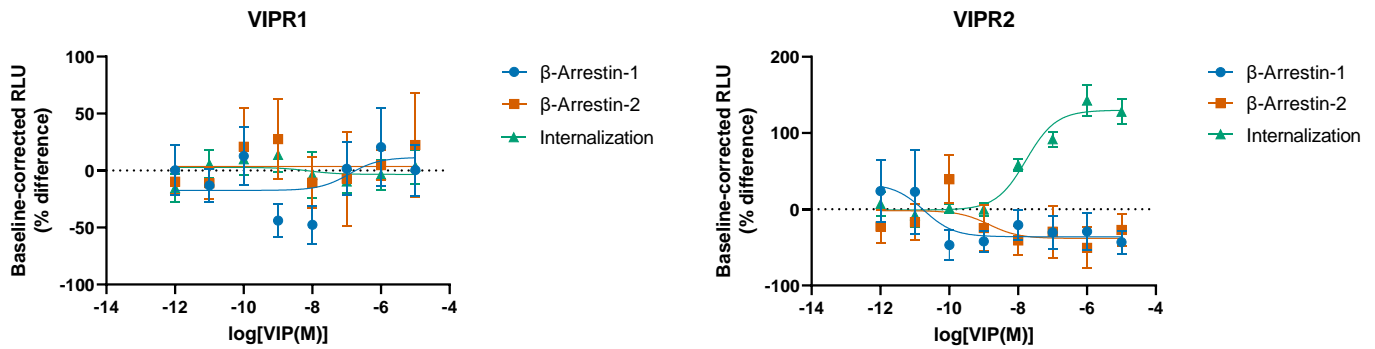

**Supplementary Figure 21. Agonist-induced profiles of  $\beta$ -arrestin-1 and  $\beta$ -arrestin-2 translocation, and receptor internalization generated using Tango-Trio (Class B/C).** To quantify agonist-dependent activities, HTTL-B1, HTTL-B2 and HTTL-F cells were plated in cumate-containing (30  $\mu$ g/mL) medium and transfected with non-orphan GPCR Tango constructs. Transfected cells were stimulated with the receptor-specific agonist, and dose-response curves were built using XY analysis for non-linear regression curve and the 3-parameters dose-response stimulation function, followed by baseline correction. Data are presented as mean values, with error bars representing SEM ( $n = 3$ , with 3 technical replicates from one biological sample). Generic receptor codes refer to the GPCR-Tango constructs.

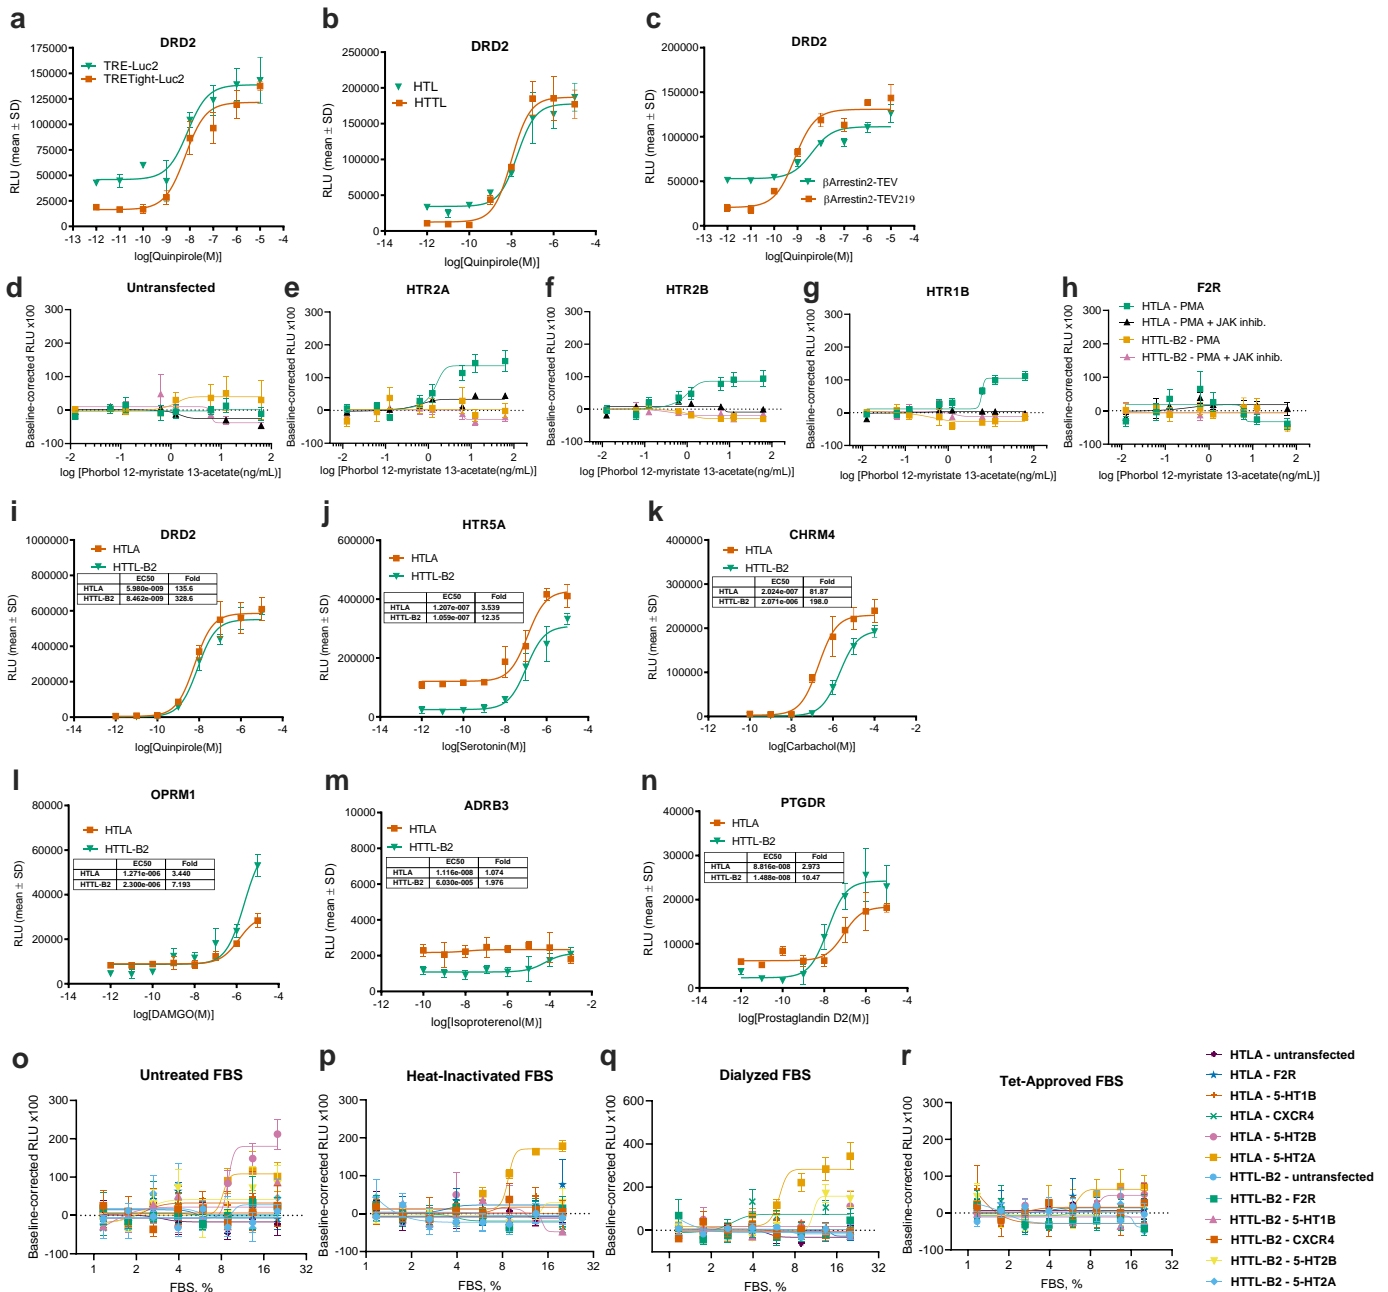

**Supplementary Figure 22. Optimization of the dynamic range, sensitivity, and specificity of the Tango-Trio platform - independent biological replicate of the main manuscript Figure 1. (A-R) Data are representative of 2 biological replicates, with 3 technical replicates each.**

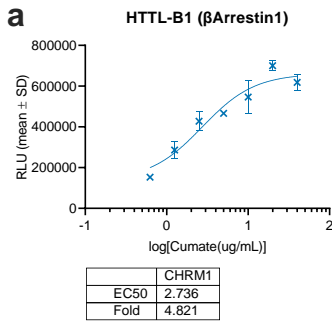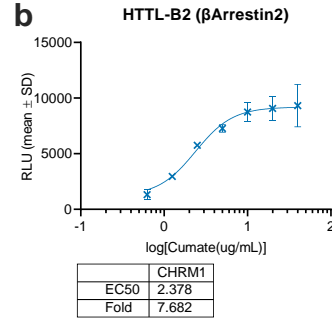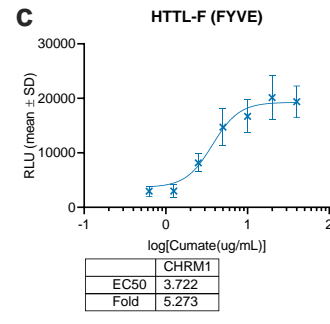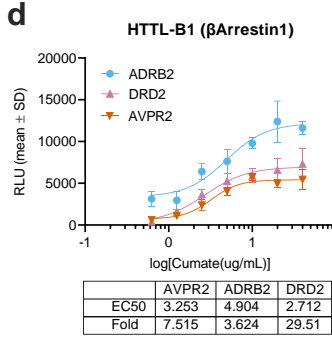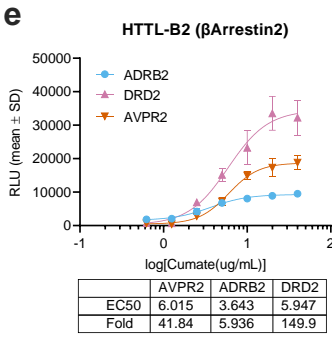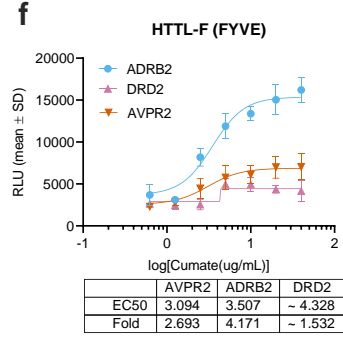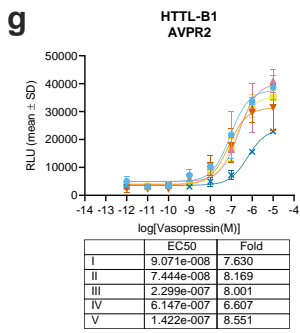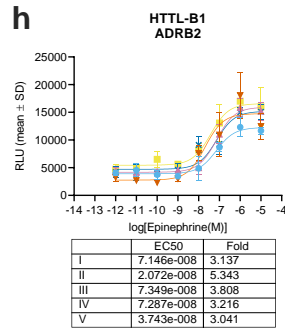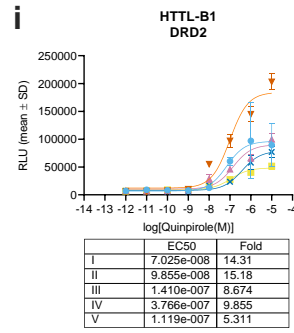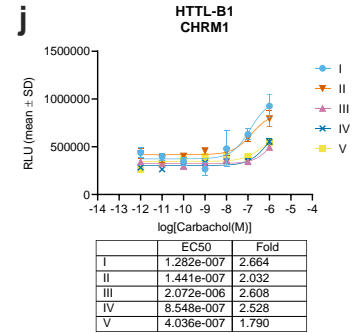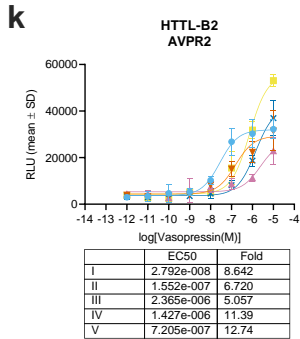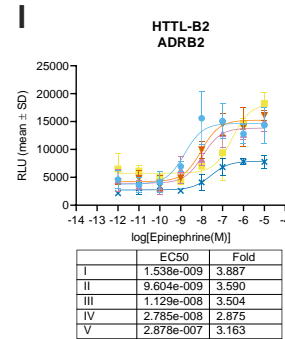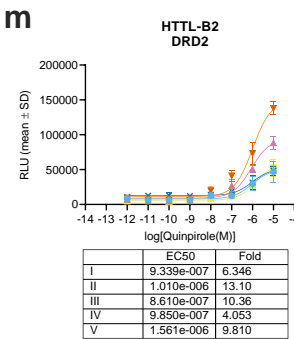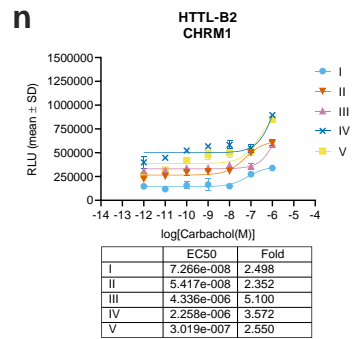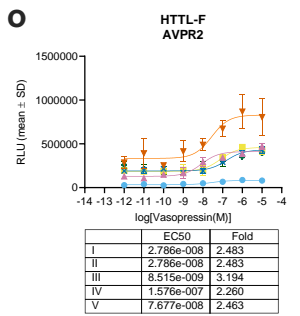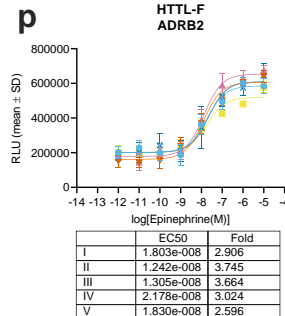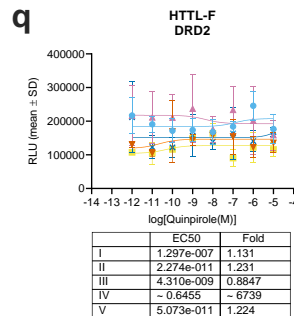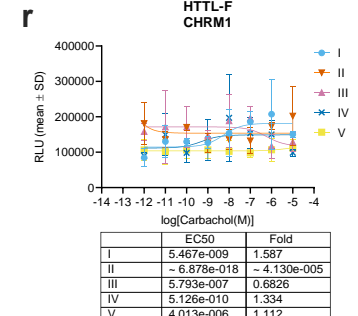

**Supplementary Figure 23. Dose-response and time-course verification of cumate-induced expression - independent biological replicate of the main manuscript Figure 2. (A-R)** Data are representative of 2 biological replicates, with 3 technical replicates each.

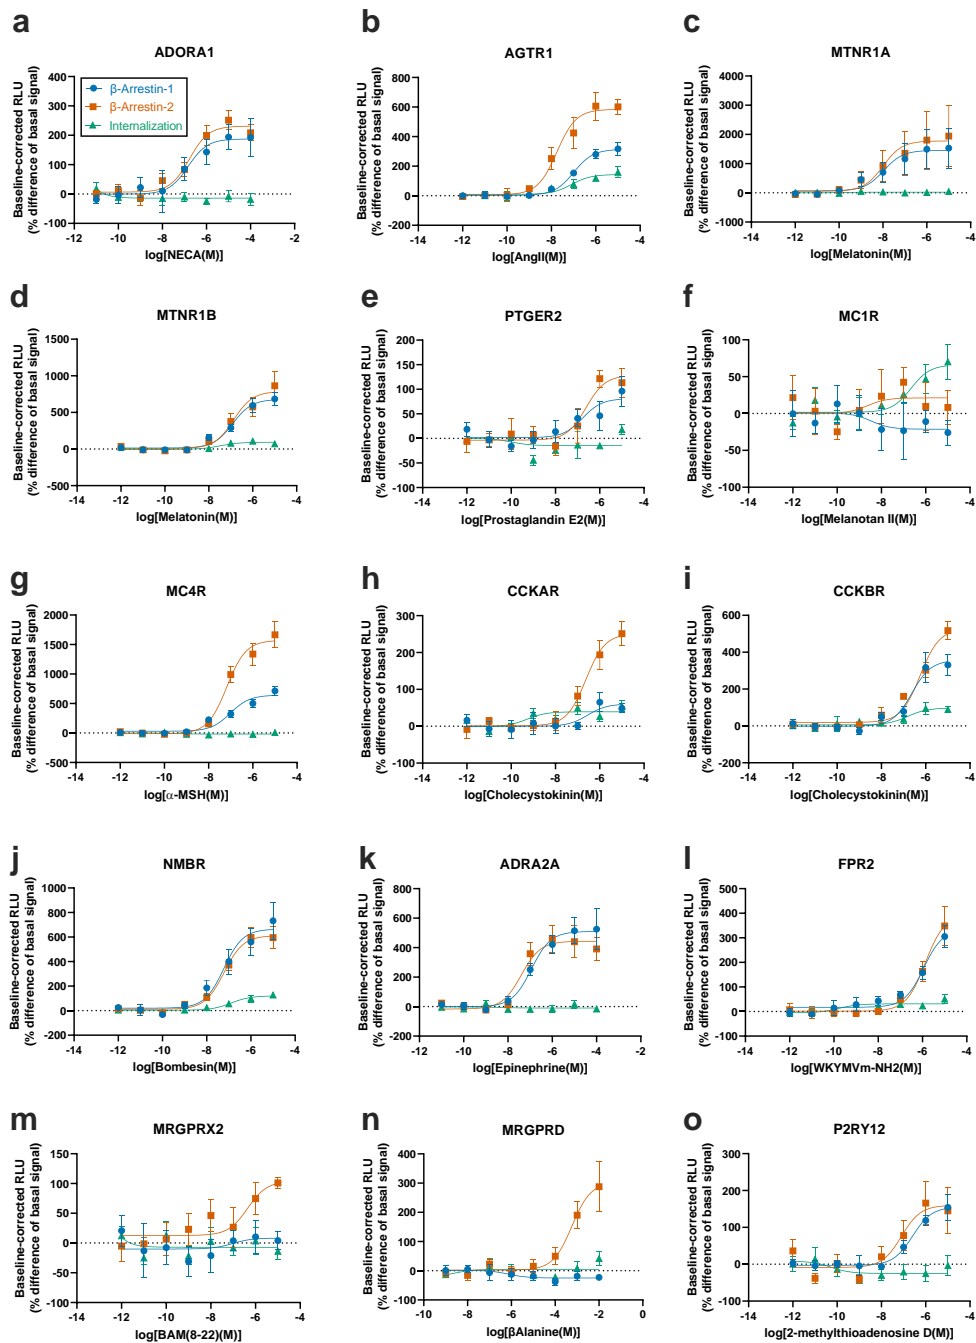

**Supplementary Figure 24. Validation of compiled positive hits from agonist-dependent HTS in dose response - independent biological replicate of the main manuscript Figure 5. (A-O) Data are representative of 2 biological replicates, with 3 technical replicates each.**

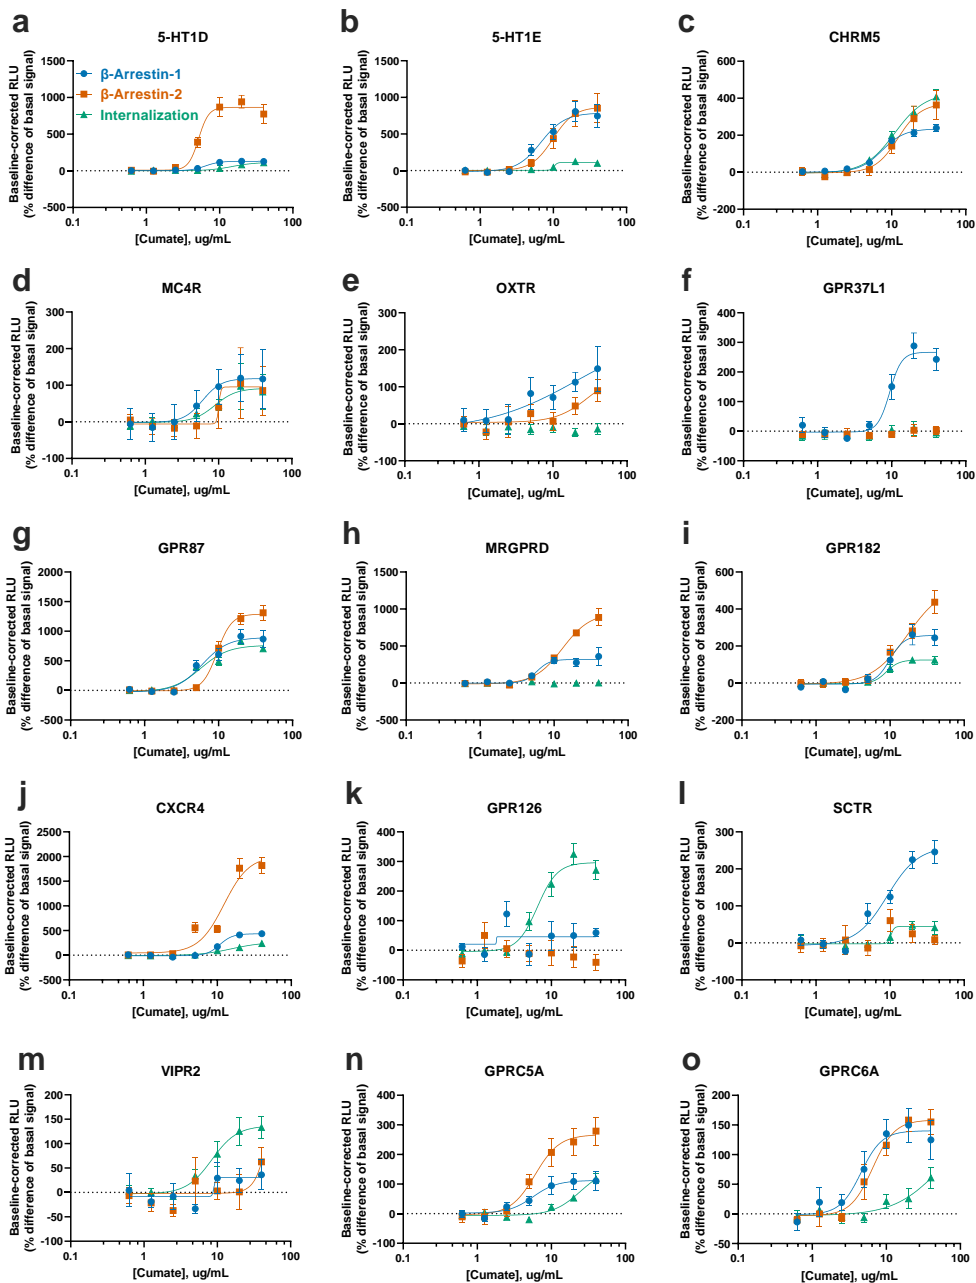

**Supplementary Figure 25. Validation of compiled positive hits from basal activity HTS in dose-response-independent biological replicate of the main manuscript Figure 6. (A-O) Data are representative of 2 biological replicates, with 3 technical replicates each.**



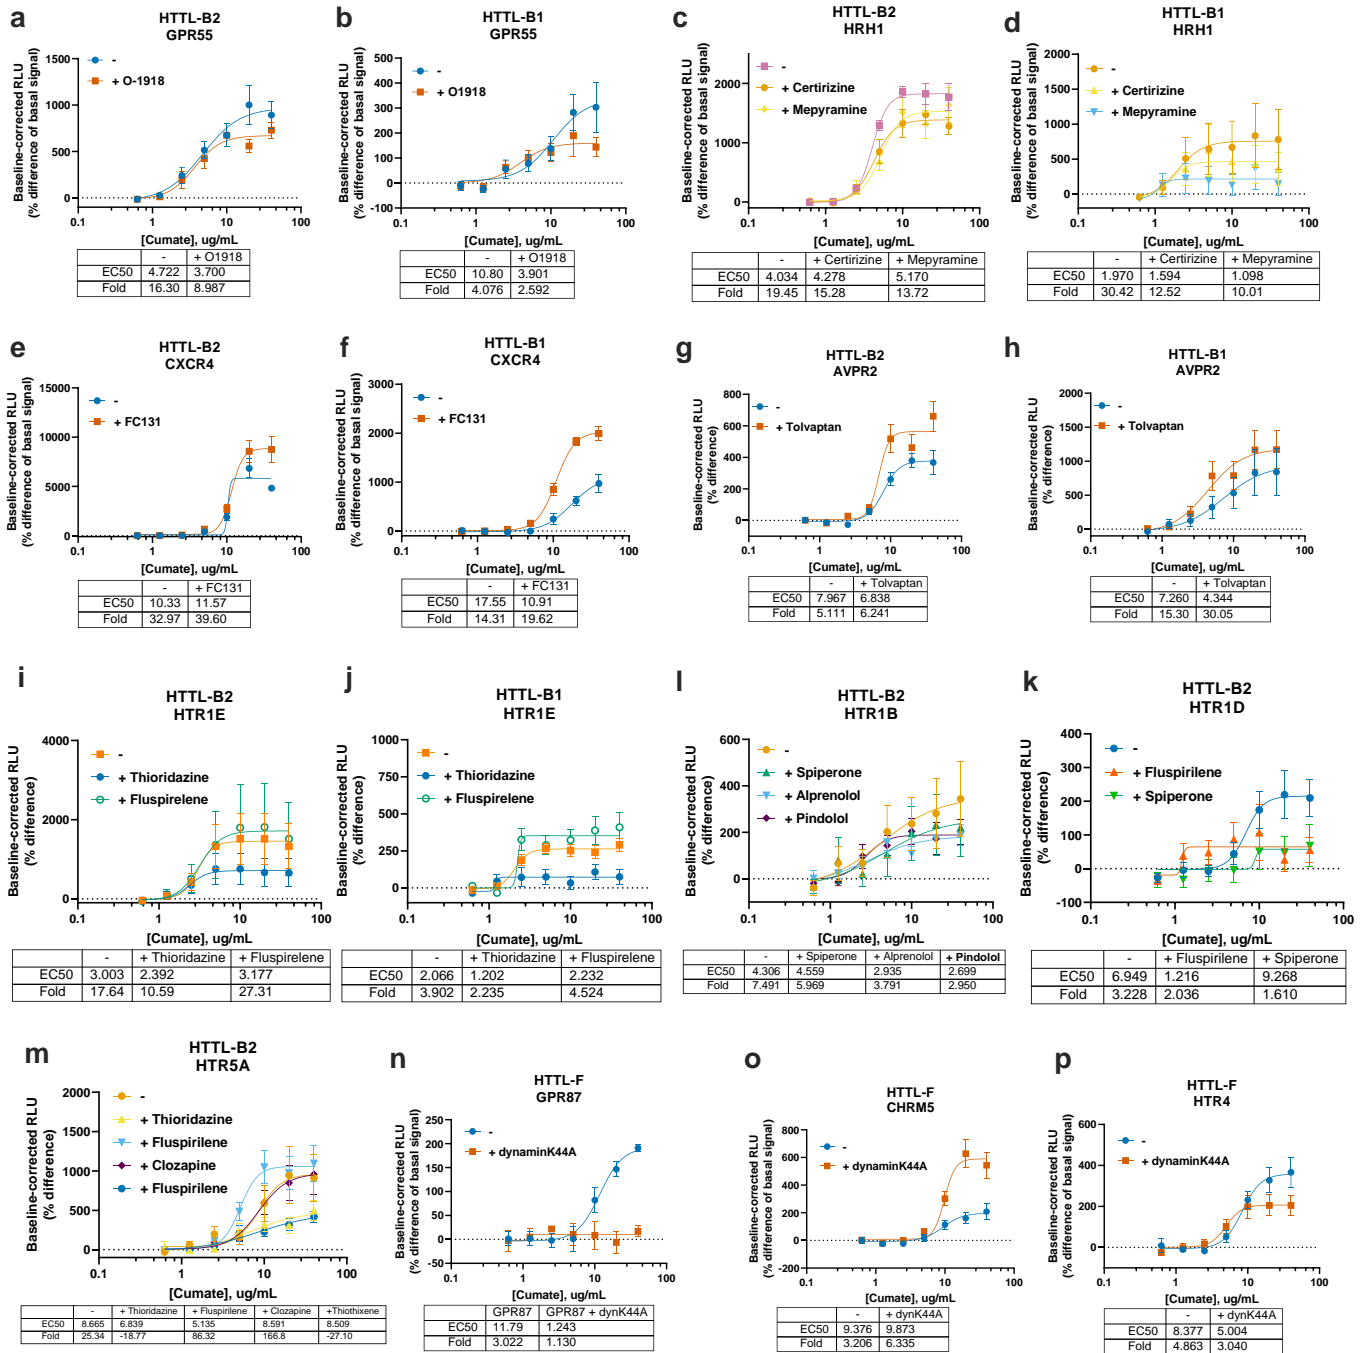

**Supplementary Figure 26. Applications and further investigations into basal activities revealed by Tango-Trio - independent biological replicate of the main manuscript Figure 7. (A-P) Data are representative of 2 biological replicates, with 3 technical replicates each.**

# Supplemental Tables

**Supplementary Table 1. Comparison of the pharmacological parameters extracted from EMTA and Tango-Trio.** Absolute pEC50 and Emax values of  $\beta$ -arrestin-1/2 activity at GPCRs stimulated with common ligands were extracted from EMTA (Avet et al. 2022) and Tango-Trio studies. Tango-Trio pEC50 data was extracted from the non-linear least-squares regression analysis using the sigmoidal dose-response function (3-parameters modeled using  $Y = \text{Bottom} + (\text{Top} - \text{Bottom}) / (1 + 10^{-(\text{LogEC50} - X)})$ ) and Emax values from the baseline correction as percentage difference using  $100 * (\text{Value} - \text{Baseline}) / \text{Baseline}$ , both provided in GraphPad Prism 9.5.1. (n = 3, with three technical replicates from one biological sample). Generic receptor codes refer to the GPCR-Tango constructs.

|                            |                         | pEC50                      |                   |                            |                    | Emax<br>(in % of vehicle response for EMTA & %<br>difference from baseline for Tango-Trio) |                   |                            |                    |
|----------------------------|-------------------------|----------------------------|-------------------|----------------------------|--------------------|--------------------------------------------------------------------------------------------|-------------------|----------------------------|--------------------|
| Receptor<br>(Gene<br>Name) | Ligand                  | $\beta$ Arrestin1<br>/GRK2 | $\beta$ Arrestin1 | $\beta$ Arrestin2<br>/GRK2 | $\beta$ -Arrestin2 | $\beta$ Arrestin1<br>/GRK2                                                                 | $\beta$ Arrestin1 | $\beta$ Arrestin2<br>/GRK2 | $\beta$ -Arrestin2 |
|                            |                         | EMTA                       | Tango-Trio        | EMTA                       | Tango-Trio         | EMTA                                                                                       | Tango-Trio        | EMTA                       | Tango-Trio         |
| HTR1B                      | Serotonin               | 7.6                        | 6.96              | 7.685                      | 6.49               | 36.35                                                                                      | 490               | 57.78                      | 393.4              |
| HTR1D                      | Serotonin               |                            | 7.66              |                            | 6.89               |                                                                                            | -14.78            |                            | 347.9              |
| HTR2A                      | Serotonin               | 6.709                      | 8.22              | 7.028                      | 5.76               | 518.1                                                                                      | 24.81             | 778.6                      | 29.24              |
| HTR2B                      | Serotonin               | 7.809                      | 6.5               | 8.168                      | 11.31              | 171.6                                                                                      | 80.54             | 247.2                      | -26.67             |
| HTR2C                      | Serotonin               | 7.995                      | 8.76              | 8.456                      | 9.33               | 1564                                                                                       | -28.38            | 705                        | 14.12              |
| AGTR1                      | Angiotensin II          | 8.64                       | 6.62              | 8.84                       | 6.41               | 207.8                                                                                      | 289.2             | 220.6                      | 7802               |
| CCKAR                      | Cholecystokinin         | 8.329                      | unstable          | 8.721                      | 7.11               | 1374                                                                                       | unstable          | 1520                       | 332.9              |
| PTGER1                     | PGE2                    |                            | 6.95              |                            | unstable           |                                                                                            | 71.02             |                            | unstable           |
| PTGER2                     | PGE2                    | 6.515                      | 6.38              | 6.925                      | 5.95               | 107.8                                                                                      | 400.8             | 100.5                      | 363                |
| PTGER3                     | PGE2                    |                            | 8.53              |                            | 6.324              |                                                                                            | -24.13            |                            | 19.44              |
| PTGER4                     | PGE2                    | 8.921                      | 8.62              | 9.25                       | 8.35               | 251.5                                                                                      | 326.9             | 146.8                      | 1192               |
| EDNRA                      | Endothelin-1            | 8.232                      | 8.9               | 8.381                      | 8.7                | 588.1                                                                                      | -8.86             | 1581                       | -2.98              |
| GHSR                       | Ghrelin                 | 8.249                      | 6.81              | 8.515                      | 6.14               | 68.41                                                                                      | 217.8             | 169.6                      | 396.8              |
| GNRHR                      | GnRH                    |                            | 10.32             |                            | 7.43               |                                                                                            | -31.52            |                            | 70.49              |
| GPBAR1                     | Lithocholic acid        |                            | unstable          |                            | 10.41              |                                                                                            | unstable          |                            | -34.66             |
| LPAR1                      | O-LPA                   | 7.528                      | 11.93             | 7.464                      | 11.21              | 289.4                                                                                      | -90.04            | 232                        | -32.09             |
| LPAR2                      | O-LPA                   | 6.773                      | 6.13              | 7.078                      | 11.33              | 715.2                                                                                      | -41.64            | 938.9                      | -64.29             |
| MC4R                       | $\alpha$ -MSH           |                            | 7.01              | 7.449                      | 7.28               |                                                                                            | 346.3             | 76.44                      | 1351               |
| OPRM1                      | DAMGO                   | 7.099                      | 9.19              | 7.424                      | 6.7                | 1008                                                                                       | -35.21            | 1198                       | 142.9              |
| MTNR1A                     | Melatonin               | 8.937                      | 8.03              | 8.75                       | 9.11               | 78.64                                                                                      | 754.1             | 157.5                      | 425.5              |
| MTNR1B                     | Melatonin               |                            | 7.12              |                            | 8.38               |                                                                                            | 290               |                            | 168                |
| OPRL1                      | Nociceptin              | 8.249                      | 6.15              | 8.716                      | 6.17               | 147.5                                                                                      | 73.78             | 238.1                      | -50.64             |
| OXTR                       | Oxytocin                | 8.091                      | 8.78              | 8.6                        | 8.67               | 128.3                                                                                      | -13.08            | 229.8                      | 82.31              |
| HCRTR2                     | Orexin-A                | 8.471                      | 6.9               | 8.558                      | 6.58               | 852.9                                                                                      | 315.7             | 863.9                      | 3850               |
| P2RY2                      | UTP                     | 5.235                      | unstable          | 5.36                       | 7.29               | 184.7                                                                                      | unstable          | 94.68                      | 24.6               |
| F2R                        | TFLLR-NH2               | 5.082                      | unstable          | 5.177                      | -2.55              | 445.5                                                                                      | unstable          | 469.5                      | unstable           |
| S1PR1                      | Sphingosine 1-phosphate | 7.269                      | 6.47              | 7.459                      | 6.5                | 477                                                                                        | 233.6             | 557.1                      | 182.8              |
| SSTR2                      | Somatostatin            | 8.815                      | 5.66              | 8.918                      | 6.83               | 2867                                                                                       | 866               | 1820                       | 1714               |
| AVPR1A                     | AVP                     | 7.743                      | 10.25             | 7.824                      | 9.08               | 890.1                                                                                      | 40.7              | 934.7                      | 40.67              |
| AVP2R                      | AVP                     | 7.603                      | 7.52              | 7.846                      | 7.03               | 353.3                                                                                      | 258.6             | 334.2                      | 1804               |
| VIPR1                      | VIP                     | 9.109                      | 6.92              | 9.254                      | unstable           | 1367                                                                                       | 28.97             | 1060                       | unstable           |
| NPY1R                      | NPY                     |                            | 8.2               | 8.815                      | 6.28               |                                                                                            | 53.76             | 42.09                      | 106.1              |
| NPY5R                      | NPY                     |                            | 7.92              |                            | 7.07               |                                                                                            | 210.3             |                            | 1046               |

# Supplemental Notes

**Supplementary Note 1. Sequences of Tango-Trio constructs stably expressed in HTTL, HTTL-B1, HTTL-B2, and HTTL-F cell lines.** Information regarding the cloning of the plasmids is provided in the Methods.

(from 1-535 bp)

# Tight-pNLCol1-Luc2 (6844 bp)

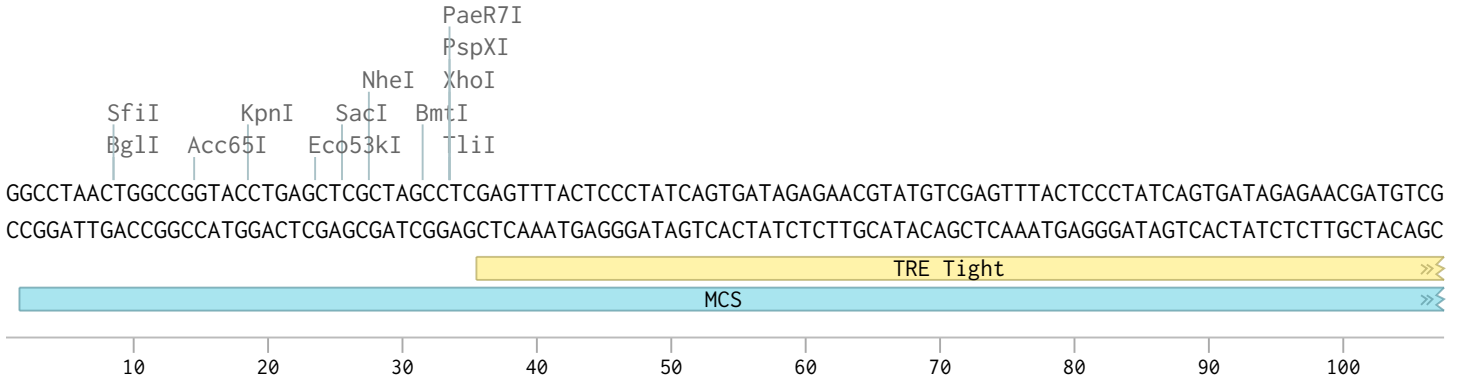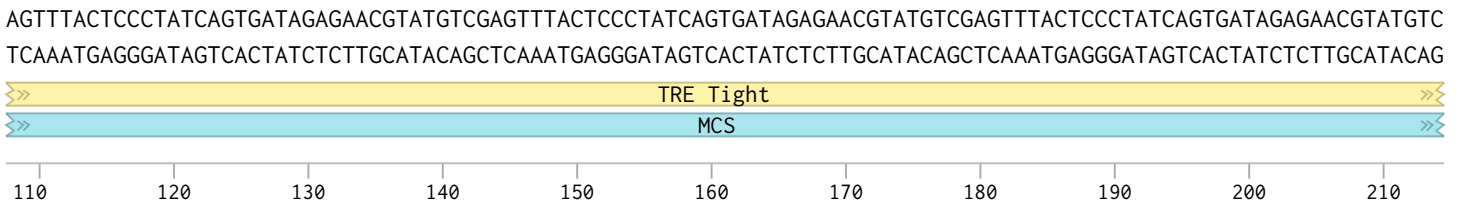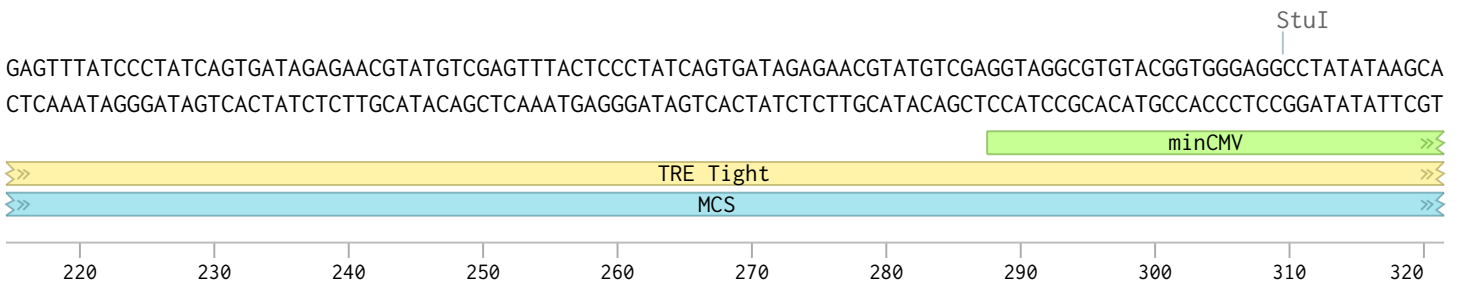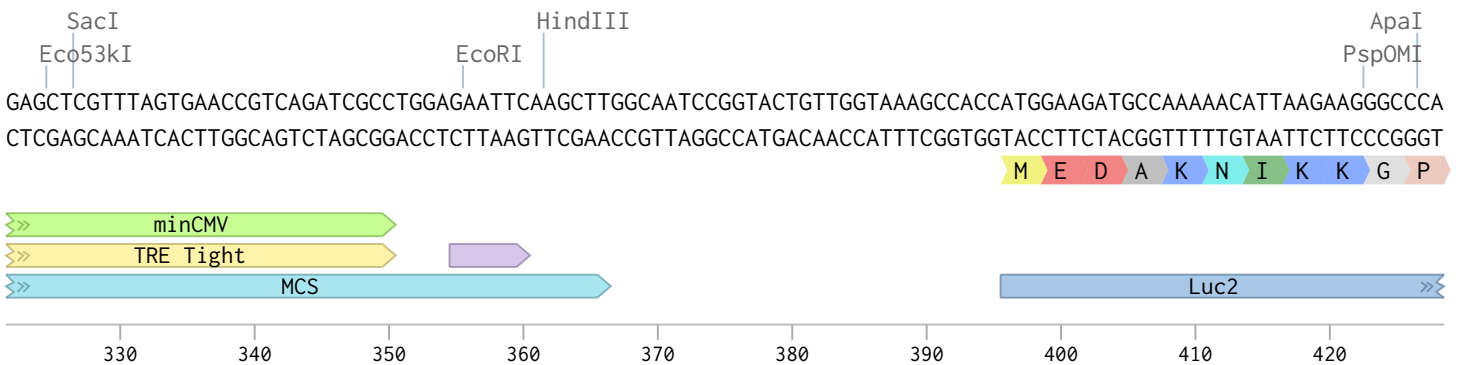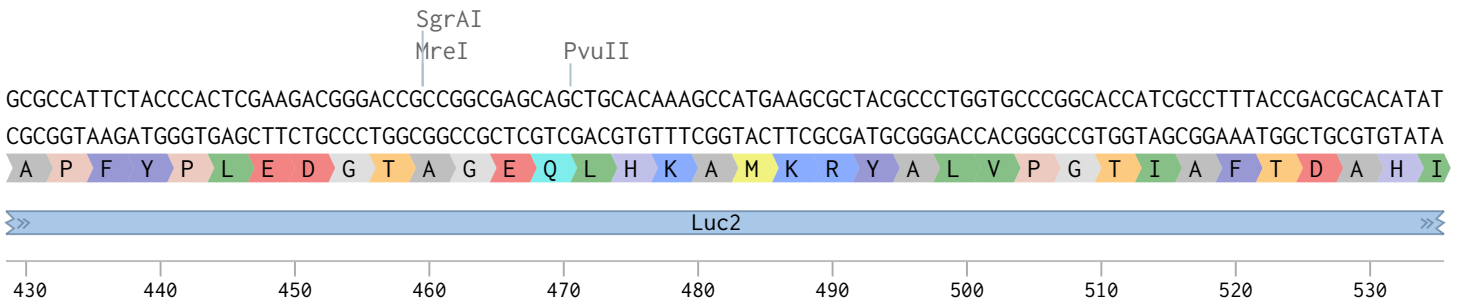

Tight-pNLCol1-Luc2 (6844 bp) (from 536-1177 bp)

CGAGGTGGACATTACCTACGCCGAGTACTTCGAGATGAGCGTTCGGCTGGCAGAAGCTATGAAGCGCTATGGGCTGAATACAAACCATCGGATCGTGGTGTGCAGCG  
GCTCCACCTGTAATGGATGCGGCTCATGAAGCTTACTCGCAAGCCGACCGTCTTCGATACTTCGCGATACCCGACTTATGTTTGGTAGCCTAGCACCACACGTCGC  
E V D I T Y A E Y F E M S V R L A E A M K R Y G L N T N H R I V V C S

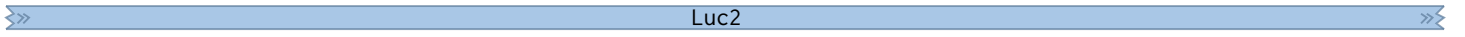

540 550 560 570 580 590 600 610 620 630 640

AGAATAGCTTGCAGTTCTTCATGCCCGTGTGGGTGCCCTGTTTCATCGGTGTGGCTGTGGCCCCAGCTAACGACATCTACAACGAGCGGAGCTGCTGAACAGCATG  
TCTTATCGAACGTCGAAGAAGTACGGGCACAACCCACGGGACAAGTAGCCACACCGACACCGGGGTGCGATTGCTGTAGATGTTGCTCGCGCTCGACGACTTGTGCTAC  
E N S L Q F F M P V L G A L F I G V A V A P A N D I Y N E R E L L N S M

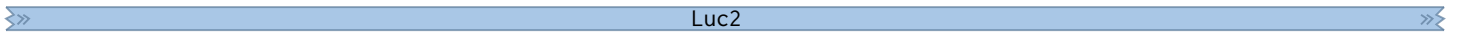

650 660 670 680 690 700 710 720 730 740

GGCATCAGCCAGCCCACCGTCGTATTCGTGAGCAAGAAAGGGCTGCAAAGATCCTCAACGTGCAAAGAAGCTACCGATCATACAAAAGATCATCATCATGGATAG  
CCGTAGTCGGTGGGTCGAGCATAAGCACTCGTCTTTCCCGACGTTTTCTAGGAGTTGCACGTTTTCTTCGATGGCTAGTATGTTTTCTAGTAGTAGTACCTATC  
G I S Q P T V V F V S K K G L Q K I L N V Q K K L P I I Q K I I I M D S

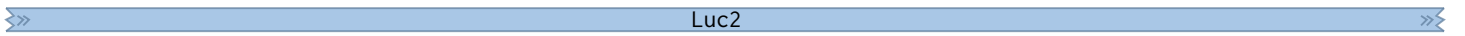

750 760 770 780 790 800 810 820 830 840 850

BsrGI AleI

CAAGACCGACTACCAGGGCTTCCAAGCATGTACACCTTCGTGACTTCCCATTGCCACCCGGCTTCAACGAGTACGACTTCGTGCCCGAGAGCTTCGACCGGGACA  
GTTCTGGCTGATGGTCCCGAAGGTTTCGTACATGTGGAAGCACTGAAGGGTAAACGGTGGCCGAAGTTGCTCATGCTGAAGCACGGGCTCTCGAAGCTGGCCCTGT  
K T D Y Q G F Q S M Y T F V T S H L P P G F N E Y D F V P E S F D R D

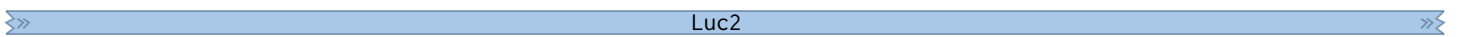

860 870 880 890 900 910 920 930 940 950 960

AAACCATCGCCCTGATCATGAACAGTAGTGGCAGTACCGGATTGCCAAGGGCGTAGCCCTACCGCACCGCACCGCTTGTGTCGATTAGTTCATGCCCGGACCCC  
TTTGGTAGCGGGACTAGTACTTGTTCATCACCGTCATGGCCTAACGGTTCCCGCATCGGGATGGCGTGGCGTGGCGAACACAGGCTAAGTACAGTACGGGCGTGGGG  
K T I A L I M N S S G S T G L P K G V A L P H R T A C V R F S H A R D P

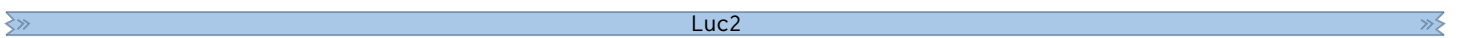

970 980 990 1,000 1,010 1,020 1,030 1,040 1,050 1,060 1,070

BbvCI

ATCTTCGGCAACAGATCATCCCCGACACCGCTATCCTCAGCGTGGTCCATTTCACCACGGCTTCGGCATGTTACCACGCTGGGCTACTTGATCTGCGGCTTTG  
TAGAAGCCGTTGGTCTAGTAGGGCTGTGGCGATAGGAGTCGACCACGGTAAAGTGGTCCGAAGCCGTACAAGTGGTGCGACCCGATGAACTAGACGCCGAAAGC  
I F G N Q I I P D T A I L S V V P F H H G F G M F T T L G Y L I C G F R

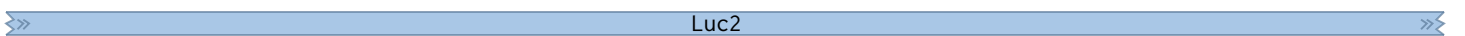

1,080 1,090 1,100 1,110 1,120 1,130 1,140 1,150 1,160 1,170

Tight-pNLCol1-Luc2 (6844 bp) (from 1178-1819 bp)

GGTCGTGCTCATGTACCGCTTCGAGGAGGAGCTATTCTTGCGCAGCTTGAAGACTATAAGATTCAATCTGCCTGCTGGTGCCACACTATTTAGCTTCTTCGTA  
 CCAGCAGGAGTACATGGCGAAGCTCCTCCTCGATAAGAACGCGTCAACGTTCTGATATTCTAAGTTAGACGGGACGACCACGGGTGTGATAAATCGAAGAAGCGAT

V V L M Y R F E E E L F L R S L Q D Y K I Q S A L L V P T L F S F F A

Luc2

1,180 1,190 1,200 1,210 1,220 1,230 1,240 1,250 1,260 1,270 1,280

PluTI  
 SfoI  
 NarI  
 KasI BlpI

AGAGCACTCTCATCGACAAGTACGACCTAAGCAACTTGACAGATCGCCAGCGGGCGCCGCTCAGCAAGGAGGTAGGTGAGGCCGTGGCCAAACGCTTCCAC  
 TCTCGTGAGAGTAGCTGTTTCATGCTGGATTTCGTTGAACGTGCTCTAGCGGTGCGCCCGCGGGCGAGTCGTTTCTCCATCCACTCCGGCACCAGGTTTGCGAAGGTG

K S T L I D K Y D L S N L H E I A S G G A P L S K E V G E A V A K R F H

Luc2

1,290 1,300 1,310 1,320 1,330 1,340 1,350 1,360 1,370 1,380 1,390

CTACCAGGCATCCGCCAGGGCTACGGCCTGACAGAAACAACCAGCGCCATTCTGATACCCCCGAAGGGGACGACAAGCCTGGCGCAGTAGGCAAGGTGGTGCCTT  
 GATGGTCCGTAGGCGGTCCCGATGCCGACTGTCTTTGTTGGTCGCGTAAGACTAGTGGGGCTTCCCCTGCTGTTTCGGACCGCCTATCCGTTCCACCACGGGAA

L P G I R Q G Y G L T E T T S A I L I T P E G D D K P G A V G K V V P F

Luc2

1,400 1,410 1,420 1,430 1,440 1,450 1,460 1,470 1,480 1,490

AgeI DraIII HpaI

CTTCGAGGCTAAGGTGGTGGACTTGGACACCGGTAAGACTGCGGTGTGAACAGCGCGGAGCTGTGCGTCCGTGGCCCCATGATCATGAGCGGCTACGTTAACA  
 GAAGCTCCGATTCACCACCTGAACCTGTGGCATTCTGTGACCCACACTTGGTCGCGCCGCTCGACACGCAGGCACCGGGTACTAGTACTCGCCGATGCAATTGT

F E A K V V D L D T G K T L G V N Q R G E L C V R G P M I M S G Y V N

Luc2

1,500 1,510 1,520 1,530 1,540 1,550 1,560 1,570 1,580 1,590 1,600

ACCCCAGGCTACAAACGCTCTCATCGACAAGGACGGCTGGCTGCACAGCGGCACATCGCCTACTGGGACGAGGACGAGCACTTCTTCATCGTGACCGGCTGAAG  
 TGGGGCTCCGATGTTTTCGAGAGTAGCTTCTCCTGCCGACCAGCTGTGCGCCGCTGTAGCGGATGACCCTGTCTCTGCTGTAAGAAGTAGCACCTGGCCGACTTC

N P E A T N A L I D K D G W L H S G D I A Y W D E D E H F F I V D R L K

Luc2

1,610 1,620 1,630 1,640 1,650 1,660 1,670 1,680 1,690 1,700 1,710

SexAI

AGCCTGATCAAATAAAGGGCTACCAGGTAGCCCCAGCCGAACCTGGAGAGCATCTGTGCAACACCCCAACATCTTCGACGCCGGGTGCGCGCCCTGCCGACGA  
 TCGGACTAGTTTATGTTCCCGATGGTCCATCGGGTTCGGCTTGACCTCTCGTAGGACGACGTTGTGGGGTTGTAGAAGCTGCGCCCCAGCGCCGACGGGCTGCT

S L I K Y K G Y Q V A P A E L E S I L L Q H P N I F D A G V A G L P D D

Luc2

1,720 1,730 1,740 1,750 1,760 1,770 1,780 1,790 1,800 1,810

Tight-pNLCol1-Luc2 (6844 bp) (from 1820-2461 bp)

CGATGCCGGCGAGCTGCCCCGCCAGTCGTCGTGCTGGAACACGGTAAAACCATGACCGAGAAGGAGATCGTGGACTATGTGGCCAGCCAGGTTACAACCGCCAAGA  
GCTACGGCCGCTCGACGGGGCGGCGTCAGCAGCACGACCTTGTGCCATTTTGGTACTGGCTCTTCTCTAGACCTGATAACCGGTCGGTCCAATGTTGGCGTTCT

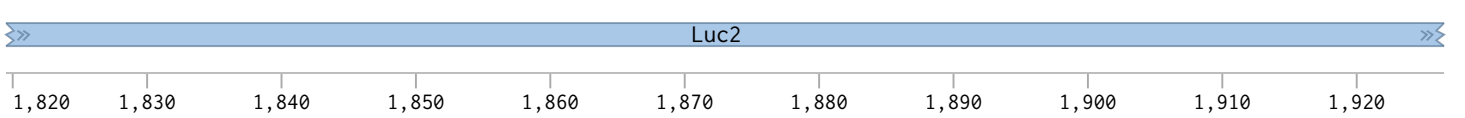

AGTCTGCGGGTGGTGTGTGTTCTGTTGACGAGGTGCCTAAAGGACTGACCGGCAAGTTGGACGCCCGCAAGATCCGCGAGATTCTCATTAAAGGCAAGAAGGGCGGC  
TCGACGCGCCACCACAACACAAGCACCTGCTCCACGGATTTCTGACTGGCCGTTCAACCTGCGGGCTTCTAGCGCTCTAAGAGTAATCCGGTCTTCCGCCG

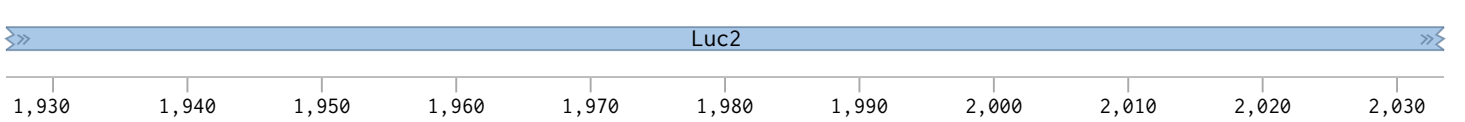

AAGATCGCCGTGtgaAGCGGAGCTACTAACTTCAGCCTGCTGAAGCAGGCTGGAGACGTGGAGGAGAACCCTGGACCTATGGTCTTACACTCGAAGATTTTCGTTGG  
TTCTAGCGGCACactTCGCCTCGATGATTGAAGTCGACGACTTCGTCGACCTCTGCACCTCTTGGGACCTGGATAACCAGAAGTGTGAGCTTCTAAAGCAACC

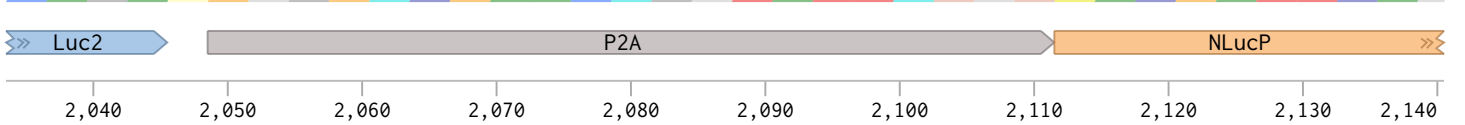

GGACTGGCGACAGACAGCCGGCTACAACCTGGACCAAGTCTTGAACAGGGAGGTGTGTCCAGTTTGTTCAGAATCTCGGGTGTCCGTAACCTCCGATCCAAAGGA  
CCTGACCGCTGTCTGTCGCGCGATGTTGGACCTGGTTCAGGAACCTGTCCCTCCACACAGGTCAAACAAAGTCTTAGAGCCCCACAGGCATTGAGGCTAGGTTTCT

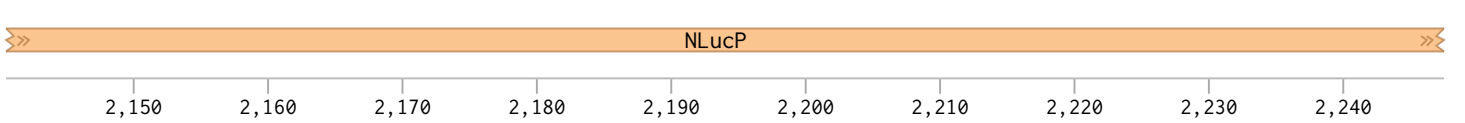

TTGTCTGAGCGGTGAAAAATGGGCTGAAGATCGACATCCATGTCATCATCCCCTATGAAGGTCTGAGCGGCGACAAATGGGCCAGATCGAAAAAATTTTTAAGGTG  
AACAGGACTCGCCACTTTTACCCGACTTCTAGCTGTAGGTACAGTAGTAGGGCATACTCCAGACTCGCCGCTGGTTTACCCGCTAGCTTTTTTAAAAATCCAC

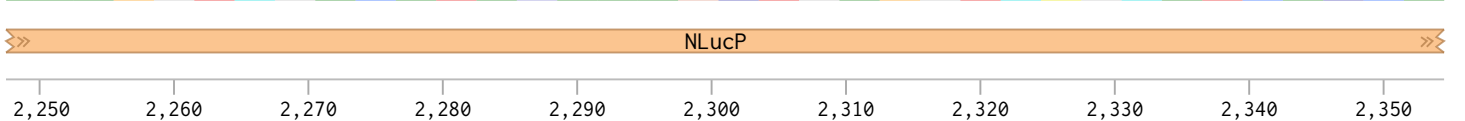

GTGTACCCTGTGGATGATCATCACTTTAAGGTGATCCTGCACTATGGCACACTGGTAATCGACGGGTTACGCCGAACATGATCGACTATTTTCGGACGGCCGTATGA  
CACATGGGACACCTACTAGTAGTAAATTCCTAGGACGTGATACCGTGTGACCATTAGCTGCCCAATGCGGCTTGTACTAGCTGATAAAGCTGCCGCATACT

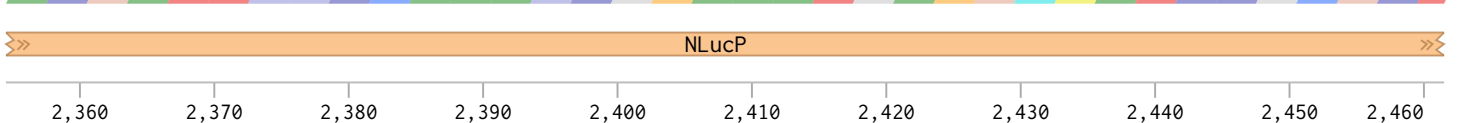



Tight-pNLCol1-Luc2 (6844 bp) (from 2462-3103 bp)

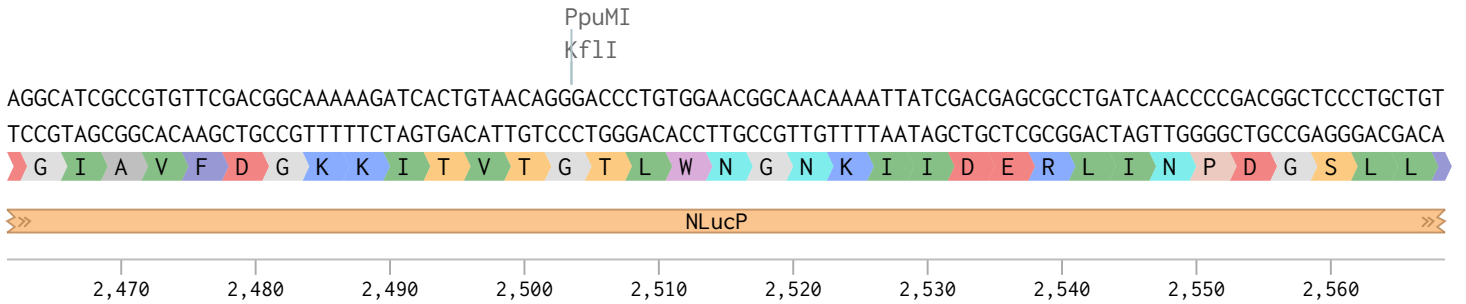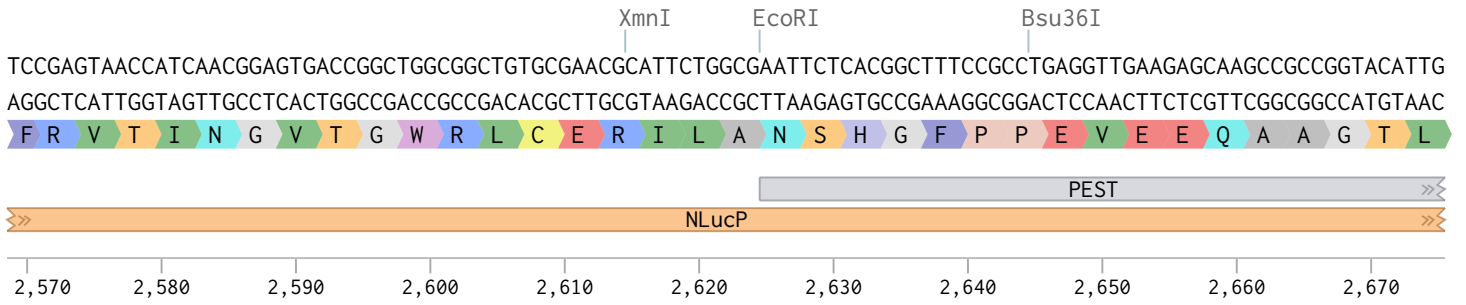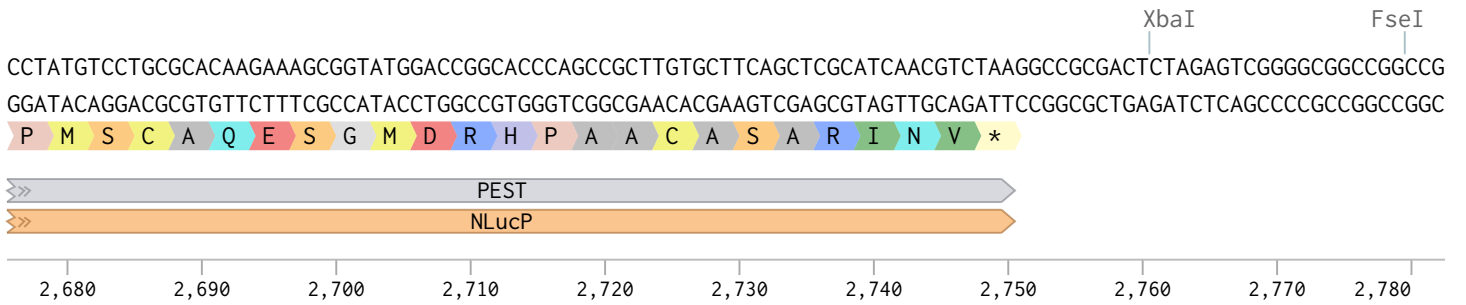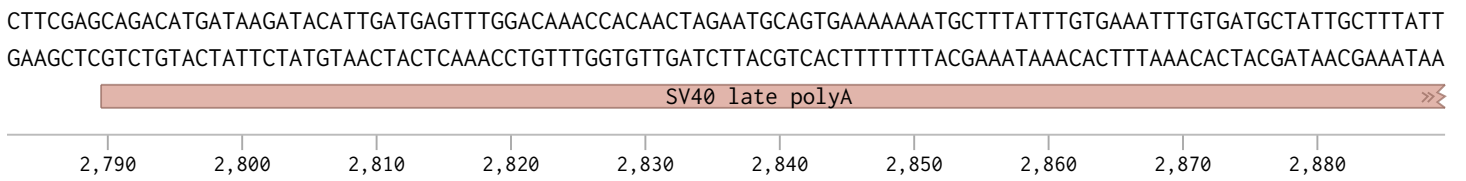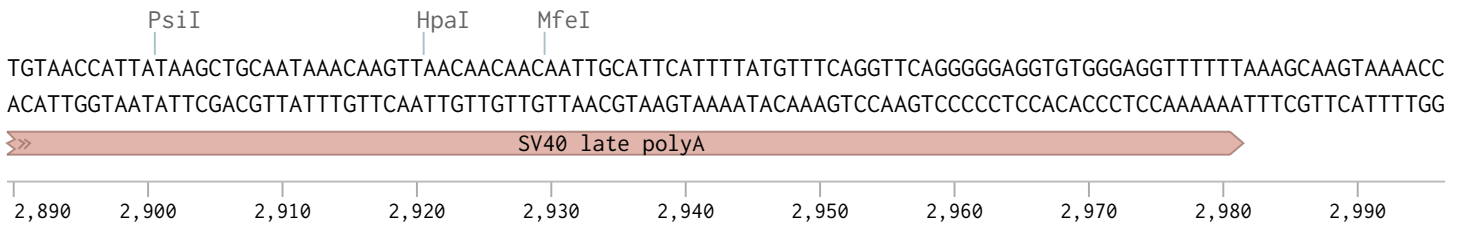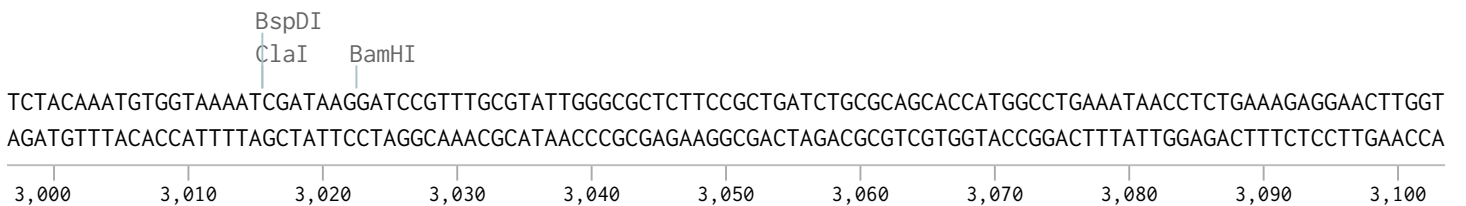

Tight-pNLCol1-Luc2 (6844 bp) (from 3104-3852 bp)

PvuII
NsiI
SphI
BstAPI  
 TAGCTACCTTCTGAGGCGGAAAGAACCAGCTGTGGAATGTGTGTCAGTTAGGGTGTGAAAGTCCCAGGCTCCCAGCAGGCAGAAGTATGCAAAGCATGCATCTC  
 ATCGATGGAAGACTCCGCCTTTCTTGGTCGCACACCTTACACACAGTCAATCCCACACCTTTCAGGGTCCGAGGGTTCGTCCTTCATACGTTTCGTACGTAGAG

3,110      3,120      3,130      3,140      3,150      3,160      3,170      3,180      3,190      3,200      3,210

SexAI
BstAPI
SphI
NsiI  
 AATTAGTCAGCAACCAGGTGTGAAAGTCCCAGGCTCCCAGCAGGCAGAAGTATGCAAAGCATGCATCTCAATTAGTCAGCAACCATAGTCCCGCCCTAACTCC  
 TTAATCAGTCGTTGGTCCACACCTTTCAGGGTCCGAGGGTTCGTCCTTCATACGTTTCGTACGTAGAGTTAATCAGTCGTTGGTATCAGGGCGGGGATTGAGG

3,220      3,230      3,240      3,250      3,260      3,270      3,280      3,290      3,300      3,310

BpI
BpI  
 GCCATCCCGCCCTAACTCCGCCAGTTCGCCATTCTCGCCCATGGCTGACTAATTTTTTTATTTATGCAGAGGCCGAGGCCCTCTGCCTCTGAGCTAT  
 CGGTAGGGCGGGGATTGAGGCGGGTCAAGGCGGGTAAGAGCGGGTACCGACTGATTAATAAATAAATACGTCTCCGGCTCCGGCGGAGACGGAGACTCGATA

3,320      3,330      3,340      3,350      3,360      3,370      3,380      3,390      3,400      3,410      3,420

AvrII
StuI  
 TCCAGAAGTAGTGAGGAGGCTTTTTGGAGGCCTAGGCTTTTGCAAAAAGCTCGATTCTTCTGACACTAGCGCCACCATGAAGAAGCCCGAACTCACCGTACCAGC  
 AGGTCTTCATCACTCTCCGAAAAACCTCCGGATCCGAAAACGTTTTTCGAGCTAAGAAGACTGTGATCGCGGTGGTACTTCTTCGGGCTTGAGTGGCGATGGTGC

3,430      3,440      3,450      3,460      3,470      3,480      3,490      3,500      3,510      3,520      3,530

XmnI  
 GTTGAAAAATTTCTCATCGAGAAGTTCGACAGTGTGAGCGACCTGATGCAGTTGTCGGAGGGCGAAGAGAGCCGAGCCTTCAGCTTCGATGTCGGCGACCGGCTA  
 CAACTTTTTAAAGAGTAGCTCTTCAAGCTGTCACACTCGCTGGACTACGTCAACAGCCTCCCGCTTCTCTCGGCTCGGAAGTCAAGCTACAGCCGCTGCGCCGAT

3,540      3,550      3,560      3,570      3,580      3,590      3,600      3,610      3,620      3,630

BsaAI
AflIII
BarI  
 TGTACTGCGGGTGAATAGCTGCGCTGATGGCTTCTACAAAGACCGTACGTGTACCGCACTTCGCCAGCGCTGCACTACCCATCCCCGAAGTGTGGACATCGGGC  
 ACATGACGCCACTTATCGACGCGACTACCGAAGATGTTTCTGGCGATGCACATGGCGGTGAAGCGGTGCGGACGTGATGGGTAGGGGCTTCAACCTGTAGCCGC

3,640      3,650      3,660      3,670      3,680      3,690      3,700      3,710      3,720      3,730      3,740

AGTTCAGCGAGAGCCTGACATACTGCATCAGTAGACGCGCCCAAGGCGTTACTCTCAAGACCTCCCCGAAACAGAGCTGCCTGCTGTGTTACAGCCTGTGCGCCGAA  
 TCAAGTCGCTCTCGGACTGTATGACGTAGTCATCTGCGCGGTTCCGCAATGAGAGGTTCTGGAGGGCTTTGTCTCGACGGACACAAATGTGGACAGCGGCTT

3,750      3,760      3,770      3,780      3,790      3,800      3,810      3,820      3,830      3,840      3,850

Tight-pNLCol1-Luc2 (6844 bp) (from 3853-4815 bp)

GCTATGGATGCTATTGCCGCCGCCGACCTCAGTCAAACCAGCGGCTTCGGCCCATTCGGGCCCAAGGCATCGGCCAGTACACAACCTGGCGGGATTTCAATTTGCGC  
CGATACCTACGATAACGGCGCGGCTGGAGTCAGTTTGGTCGCGGAAGCCGGTAAGCCCGGGTTCCTAGCCGGTCATGTGTTGGACCGCCCTAAAGTAAACGCG

3,860 3,870 3,880 3,890 3,900 3,910 3,920 3,930 3,940 3,950

CATTGCTGATCCCCATGTCTACCACTGGCAGACCGTGATGGACGACACCGTGTCCGCCAGCGTAGCTCAAGCCCTGGACGAACTGATGCTGTGGGCCGAAGACTGTC  
GTAACGACTAGGGGTACAGATGGTGACCGTCTGGCACTACCTGCTGTGGCACAGGCGGTGCATCGAGTTCGGGACCTGCTTGACTACGACACCCGGCTTCTGACAG

3,960 3,970 3,980 3,990 4,000 4,010 4,020 4,030 4,040 4,050 4,060

CCGAGGTGCGCCACCTCGTCCATGCCGACTTCGGCAGCAACAACGTCCTGACCGACAACGGCCGCATCACCGCCGTAATCGACTGGTCCGAAGCTATGTTCCGGGAC  
GGCTCCACGCGGTGGAGCAGGTACGGCTGAAGCCGTCGTTGTTGCAGGACTGGCTGTTGCCGGCGTAGTGCCGGCATTAGCTGACCAGGCTTCGATACAAGCCCTG

4,070 4,080 4,090 4,100 4,110 4,120 4,130 4,140 4,150 4,160 4,170

AGTCAGTACGAGGTGGCCAACATCTTCTTCTGGCGGCCCTGGCTGGCTTGCATGGAGCAGCAGACTCGCTACTTCGAGCGCCGGCATCCCAGCTGGCCGGCAGCCC  
TCAGTCATGCTCCACCGTTGTAGAAGAAGACCGCCGGGACCGACCGAACGTACCTCGTCGTCGAGCGATGAAGCTCGCGCCGTAGGGCTCGACCGCCGTCGGG

4,180 4,190 4,200 4,210 4,220 4,230 4,240 4,250 4,260 4,270 4,280

TCGTCGCGAGCCTACATGCTGCGCATCGGCCTGGATCAGCTCTACCAGAGCCTCGTGAGCGCAACTTCGACGATGCTGCCTGGGCTCAAGGCCGCTGCGATGCCA  
AGCAGACGCTCGGATGTACGACCGTAGCCGGACCTAGTCGAGATGGTCTCGGAGCACCTGCCGTTGAAGCTGCTACGACGGACCCGAGTTCGGCGACGCTACGGT

4,290 4,300 4,310 4,320 4,330 4,340 4,350 4,360 4,370 4,380

TCGTCGCGAGCGGGCCGGCACCGTCCGTCGCACACAAATCGCTCGCCGGAGCGCAGCCGTATGGACCGACGCTGCGTCGAGGTGCTGGCCGACAGCGCAACCGC  
AGCAGGCGTCGCCCCGGCCGTGGCAGCCAGCGTGTGTTAGCGAGCGGCCCTCGCTCGGCATACCTGGCTGCCGACGCGAGCTCCACGACCGGCTGTCGCCGTTGGCG

4,390 4,400 4,410 4,420 4,430 4,440 4,450 4,460 4,470 4,480 4,490

CGGCCAGTACACGACCGCGCGCTAAGGAGGTAGGTCGAGTTTAAACTCTAGAACCGGTCATGGCCGAATAAAATATCTTTATTTTCATTACATCTGTGTGTTGGT  
GCCGGTCATGTGCTGGCGCGGATTCTCCATCCAGCTCAAATTTGAGATCTTGCCAGTACCGCGCTATTTTATAGAAATAAAAGTAATGTAGACACACAACCA

4,500 4,510 4,520 4,530 4,540 4,550 4,560 4,570 4,580 4,590 4,600

TTTTTGTGTGTTCGAACTAGATGCTGTCGACCGATGCCCTTGAGAGCCTTCAACCCAGTCAGCTCCTTCCGGTGGGCGCGGGGCATGACTATCGTCGCCGCACTTAT  
AAAAACACACAAGCTTGATCTACGACAGCTGGCTACGGAACTCTCGGAAGTTGGGTCAGTCGAGGAAGGCCACCCGCGCCCCGTACTGATAGCAGCGCGTGAATA

4,610 4,620 4,630 4,640 4,650 4,660 4,670 4,680 4,690 4,700

GACTGTCTTCTTTATCATGCAACTCGTAGGACAGGTGCCGGCAGCGCTCTTCCGCTTCTCGCTCACTGACTCGCTGCGCTCGGTGCTTCCGGTGGCGGAGCGGTA  
CTGACAGAAGAAATAGTACGTTGAGCATCCTGTCCACGGCCGTCGCGAGAAGGCGAAGGAGCGAGTGACTGAGCGACGCGAGCCAGCAAGCCGACCGCTCGCCAT

4,710 4,720 4,730 4,740 4,750 4,760 4,770 4,780 4,790 4,800 4,810

Tight-pNLCol1-Luc2 (6844 bp) (from 4816-5564 bp)

AflIII  
PciI  
TCAGCTCACTCAAAGGCGGTAATACGGTTATCCACAGAATCAGGGGATAACGCAGGAAAGAACATGTGAGCAAAGGCCAGCAAAGGCCAGGAACCGTAAAAAGGC  
AGTCGAGTGAGTTTCCGCCATTATGCCAATAGGTGTCTTAGTCCCCTATTGCGTCCTTTCTTGTACTACTGTTTTCCGGTCTTTTTCCGGTCTTGGCATTTCCTCCG

4,820 4,830 4,840 4,850 4,860 4,870 4,880 4,890 4,900 4,910 4,920

CGGTTGCTGGCGTTTTTCCATAGGCTCCGCCCCCTGACGAGCATCACAAAAATCGACGCTCAAGTCAGAGGTGGCGAAACCCGACAGGACTATAAAGATACCAGG  
GCGCAACGACCGCAAAGGTATCCGAGGCGGGGGGACTGCTCGTAGTGTTTTAGCTGCGAGTTCAGTCTCCACCGCTTTGGGCTGTCTGATATTCTATGGTCC

ColE1 origin

4,930 4,940 4,950 4,960 4,970 4,980 4,990 5,000 5,010 5,020

BciVI  
CGTTTCCCCTGGAAGCTCCCTCGTGCGCTCTCCTGTTCCGACCCTGCCGTTACCGGATACCTGTCCGCTTTCTCCCTTCGGGAAGCGTGGCGCTTTCATAGC  
GCAAAGGGGGACCTTCGAGGGAGCACGCGAGAGGACAAGGCTGGGACGGCGAATGGCCTATGACAGGCGGAAAGAGGGAAGCCCTTCGCACCGCGAAAGAGTATCG

ColE1 origin

5,030 5,040 5,050 5,060 5,070 5,080 5,090 5,100 5,110 5,120 5,130

ApaI  
TCACGCTGTAGGTATCTCAGTTCGGTGTAGGTCGTTGCTCCAAGCTGGGCTGTGTGCACGAACCCCCGTTACGCCGACCGCTGCGCCTTATCCGGTAACTATCG  
AGTGCGACATCCATAGAGTCAAGCCACATCCAGCAAGCGAGGTTGACCCGACACACGTGCTTGGGGGCAAGTCGGGCTGGCGACGCGGAATAGGCCATTGATAGC

ColE1 origin

5,140 5,150 5,160 5,170 5,180 5,190 5,200 5,210 5,220 5,230 5,240

AlwNI  
TCTTGAGTCCAACCCGGTAAGACACGACTTATCGCCACTGGCAGCAGCCACTGGTAACAGGATTAGCAGAGCGAGGTATGTAGCGGTGCTACAGAGTTCCTGAAGT  
AGAACTCAGGTTGGGCCATTCTGTGCTGAATAGCGGTGACCGTCTGCGGTGACCATTGTCCTAATCGTCTCGCTCCATACATCCGCCACGATGTCTCAAGAACTTCA

ColE1 origin

5,250 5,260 5,270 5,280 5,290 5,300 5,310 5,320 5,330 5,340 5,350

GGTGGCCTAACTACGGCTACACTAGAAGAACAGTATTTGGTATCTGCGCTCTGCTGAAGCCAGTTACCTTCGAAAAAGAGTTGGTAGCTCTTGATCCGGCAAACAA  
CCACCGGATTGATGCCGATGTGATCTTCTTGTCAAAACCATAGACGCGAGACGACTTCGGTCAATGGAAGCCTTTTTCTCAACCATCGAGAACTAGGCCGTTTGT

ColE1 origin

5,360 5,370 5,380 5,390 5,400 5,410 5,420 5,430 5,440 5,450

ACCACCGCTGGTAGCGGTGGTTTTTTGTTTGAAGCAGCAGATTACGCGCAGAAAAAAGGATCTCAAGAAGATCCTTTGATCTTTTCTACGGGGTCTGACGCTCA  
TGGTGGCGACCATCGCCACAAAAAACAACGTTGCTGCTAATGCGCGTCTTTTTTCTAGAGTCTTCTAGGAACTAGAAAAGATGCCCCAGACTGCGAGT

ColE1 origin

5,460 5,470 5,480 5,490 5,500 5,510 5,520 5,530 5,540 5,550 5,560

Tight-pNLCol1-Luc2 (6844 bp) (from 5565-6527 bp)

GTGGAACGAAAACACTCACGTTAAGGGATTTTGGTCATGAGATTATCAAAAAGGATCTTCACCTAGATCCTTTTAAATTAATAAATGAAGTTTTAAATCAATCTAAAGTACACCTTGCTTTTGGAGTGCAATTCCTAAAACAGTACTCTAATAGTTTTCTAGAAAGTGATCTAGGAAAATTAATTTTTACTTCAAAAATTTAGTTAGATTTTCAT

ColE1 origin

5,570 5,580 5,590 5,600 5,610 5,620 5,630 5,640 5,650 5,660 5,670

BstEII

BstXI

PstI

NotI

AleI

TATATGAGTAAACTTGGTCTGACAGCGGCCGCAAAATGCTAAACCACTGCAGTGGTTACCAGTGCTTGATCAGTGAGGCACCGATCTCAGCGATCTGCCTATTTTCGTTATATACTCATTTGAACCAGACTGTCGCCGGCGTTTACGATTTGGTGACGTACCAATGGTCACGAACTAGTCACTCCGTGGCTAGAGTCGCTAGACGGATAAAGCAA

5,680 5,690 5,700 5,710 5,720 5,730 5,740 5,750 5,760 5,770

CGTCCATAGTGGCCTGACTCCCCGTCGTGTAGATCACTACGATTCGTGAGGGCTTACCATCAGGCCCCAGCGCAGCAATGATGCCGCGAGAGCCGCTTACCCGGCCGCAGGTATCACCCGACTGAGGGGCAGCACATCTAGTGATGCTAAGCACTCCCGAATGGTAGTCCGGGGTCGCGTCGTTACTACGGCGCTCTCGGGCAAGTGGCCGG

5,780 5,790 5,800 5,810 5,820 5,830 5,840 5,850 5,860 5,870 5,880

CCCGATTTGTCAGCAATGAACCAGCCAGCAGGGAGGGCCGAGCGAAGAAGTGGTCTGCTACTTTGTCCGCCTCCATCCAGTCTATGAGCTGCTGTCGTGATGCTAGGGCTAAACAGTCGTTACTTGGTCGGTCGTCCTCCCGGCTCGCTTCTTACCAGGACGATGAAACAGGCGGAGGTAGTGCAGATACTCGACGACAGCACTACGATC

5,890 5,900 5,910 5,920 5,930 5,940 5,950 5,960 5,970 5,980 5,990

AGTAAGAAGTTCGCCAGTGAGTAGTTTCCGAAGAGTTGTGGCCATTGCTACTGGCATCGTGGTATCACGCTCGTTCGGTATGGCTTCGTTCAACTCTGGTTCCCTCATTCTTCAAGCGTCACTCATCAAAGGCTTCTCAACACCGGTAACGATGACCGTAGCACCATAGTGCAGCAGCAAGCCATACCGAAGCAAGTTGAGACCAAGGG

6,000 6,010 6,020 6,030 6,040 6,050 6,060 6,070 6,080 6,090

AGCGGTCAAGCCGGTACATGATCACCCATATTATGAAGAAATGCAGTCAGCTCCTTAGGGCTCCGATCGTTGTCAGAAGTAAGTTGGCCGCGGTGTTGTCGCTCTCGCCAGTTCGCCCCAGTGTACTAGTGGGTATAATACTTCTTTACGTCAGTCGAGGAATCCCGGAGGCTAGCAACAGTCTTCATTCAACCGGCGCCACAACAGCGAG

6,100 6,110 6,120 6,130 6,140 6,150 6,160 6,170 6,180 6,190 6,200

Bsu36I

PvuI

SacII

ATGGTAATGGCAGCACTACACAATTCTTACCAGTATGCCATCCGTAAGATGCTTTTCCGTGACCGGCGAGTACTCAACCAAGTCGTTTTGTGAGTAGTGTATACGTACCATTACCAGTCGTGATGTGTTAAGAGAATGGCAGTACGGTAGGCATTCTACGAAAAGGCACTGGCCGCTCATGAGTTGGTTCAGCAAAACACTCATCACATATGC

6,210 6,220 6,230 6,240 6,250 6,260 6,270 6,280 6,290 6,300 6,310

GCGACCAAGCTGCTCTTGGCCGGCTCTATACGGGACAACCCGCGCCACATAGCAGTACTTTGAAAGTGCTCATCATCGGGAATCGTTCTTGGGGCGGAAAGACTCGCTGGTTCGACGAGAACGGGCCGAGATATGCCCTGTTGTGGCGGGTGTATCGTCATGAAACTTTACAGAGTAGTAGCCCTTAGCAAGAAGCCCGCCTTTCTGA

6,320 6,330 6,340 6,350 6,360 6,370 6,380 6,390 6,400 6,410 6,420

CAAGGATCTTGCCGCTATTGAGATCCAGTTTCGATATAGCCCACTCTTGACCCAGTTGATCTTCAGCATCTTTACTTTACCAGCGTTTTCGGGGTGTGAAAAACA GTTCTTAGAACGGCGATAACTTAGTCAAGCTATATCGGGTGAGAACGTGGGTCAACTAGAAGTCGTAGAAAATGAAAGTGGTCGCAAGCCCCACAGTTTTTTGT

6,430 6,440 6,450 6,460 6,470 6,480 6,490 6,500 6,510 6,520

BstZ17I

Tight-pNLCol1-Luc2 (6844 bp) (from 6528-6844 bp)

GGCAAGCAAATGCCGCAAAGAAGGGAATGAGTGCACACGAAAATGTTGGATGCTCATACTCGTCCTTTTTCAATATTATTGAAGCATTATCAGGGTTACTAGTA  
CCGTTTCGTTTTACGGCGTTTTCTCCCTTACTCACGCTGTGCTTTTACAACCTACGAGTATGAGCAGGAAAAAGTTATAATAACTTCGTAATAGTCCCAATGATCAT

6,530 6,540 6,550 6,560 6,570 6,580 6,590 6,600 6,610 6,620 6,630

Esp3I  
BsmBI  
BsmAI  
BcoDI  
SspI

CGTCTCTCAAGGATAAGTAAGTAATATTAAGGTACGGGAGGTATTGGACAGGCCGAATAAAATATCTTTATTTTCATTACATCTGTGTGTGGTTTTTGTGTGAA  
GCAGAGAGTTCCTATTCATTATTATAATTCCATGCCCTCCATAACCTGTCCGGCGTTATTTTATAGAAATAAAAGTAATGTAGACACACAACCAAAAAACACACTT

6,640 6,650 6,660 6,670 6,680 6,690 6,700 6,710 6,720 6,730 6,740

BspDI  
ClaI  
PaqCI  
BspMI  
BfuAI

TCGATAGTACTAACATACGCTCTCCATCAAAACAAAACGAAACAAAACAACTAGCAAAATAGGCTGTCCCCAGTGCAAGTGCAGGTGCCAGAACATTTCTCT  
AGCTATCATGATTGTATGCGAGAGGTAGTTTTGTTTTGCTTTGTTTTGTTTGATCGTTTTATCCGACAGGGGTCACGTTCCAGTCCACGGTCTTGTAAGAGA

6,750 6,760 6,770 6,780 6,790 6,800 6,810 6,820 6,830 6,840

(from 1-642 bp)

# bArr1-HA-TEV219 pCDH-CuO-MCS-EF1 $\alpha$ -CymR-T2A-Bleo...

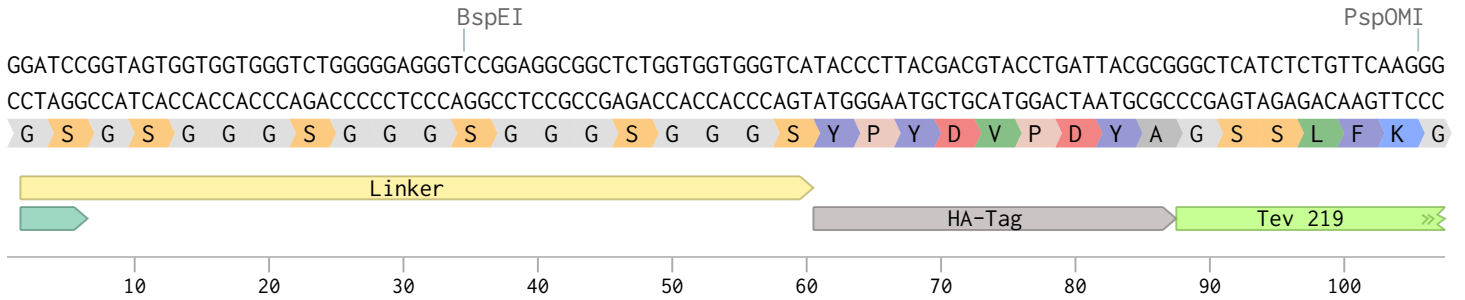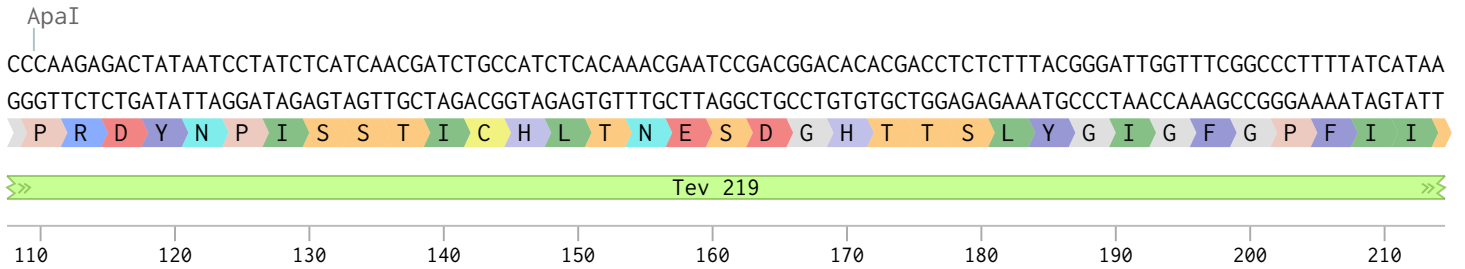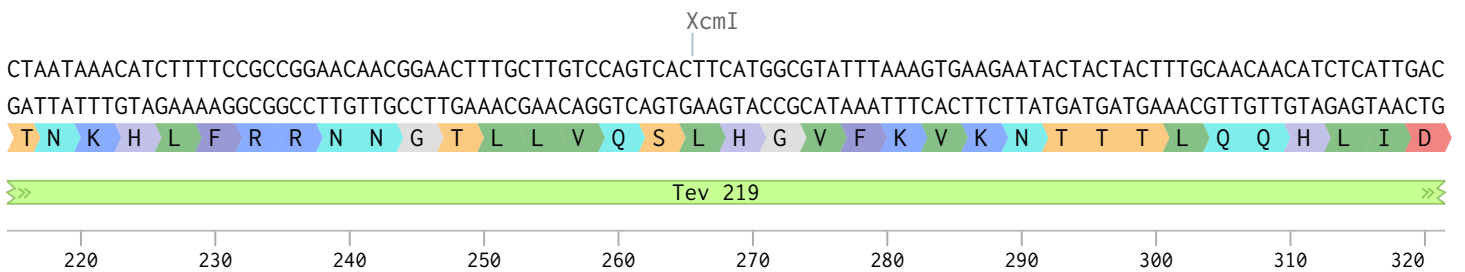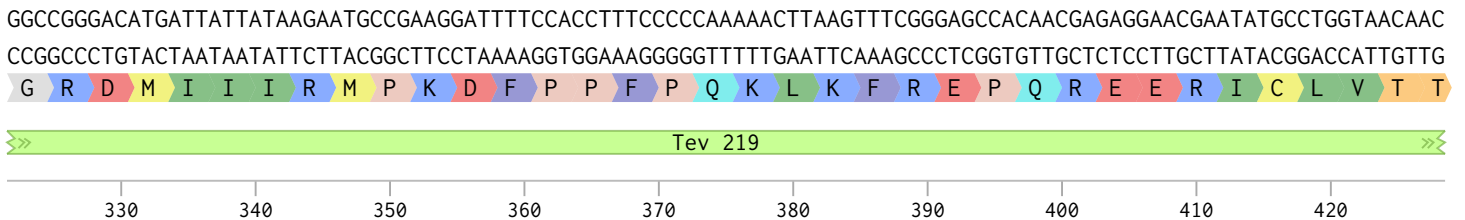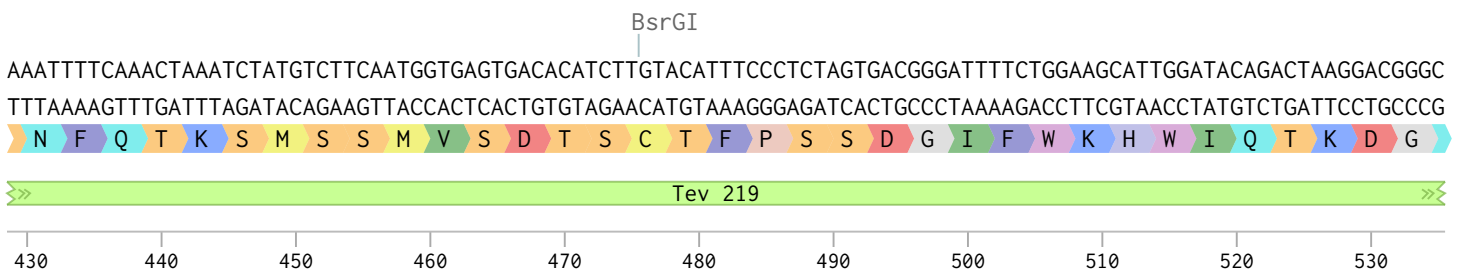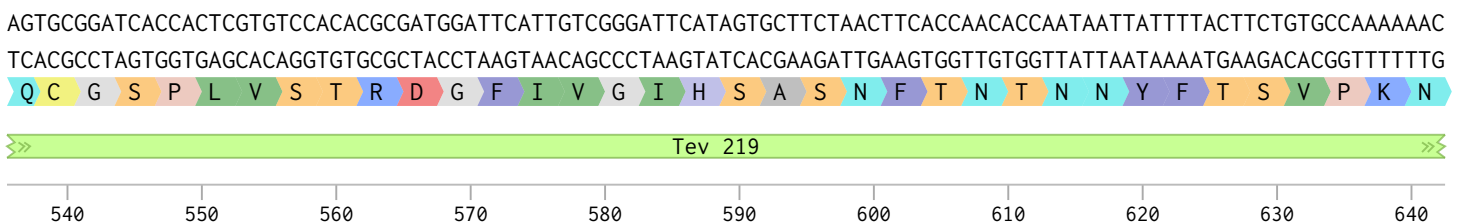

bArr1-HA-TEV219 pCDH-CuO-MCS-EF1 $\alpha$ -CymR-T2A-Bleo3 SparQ (10934 bp)

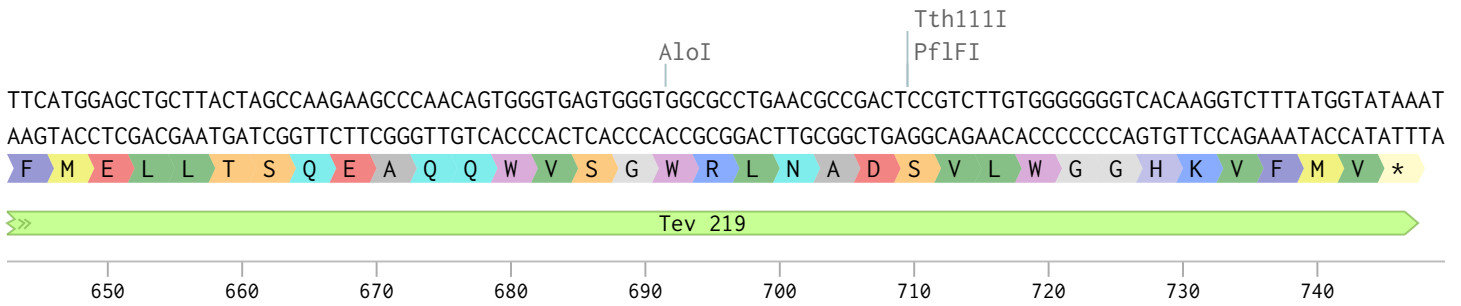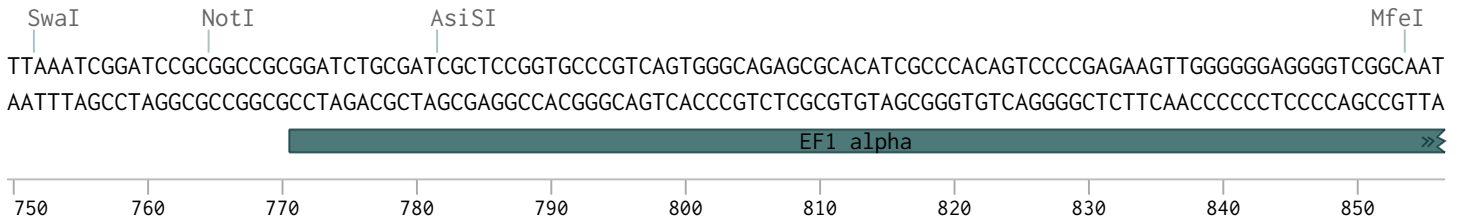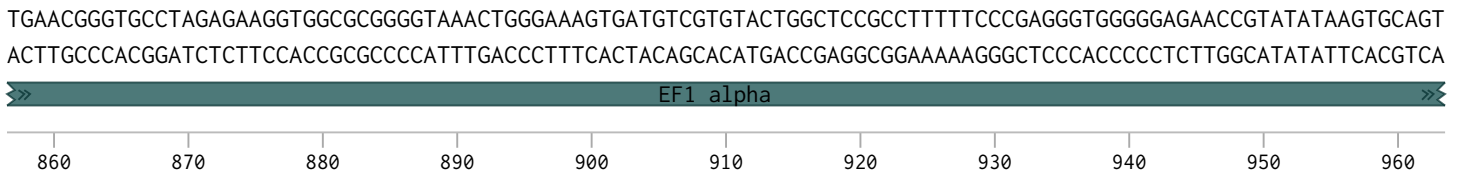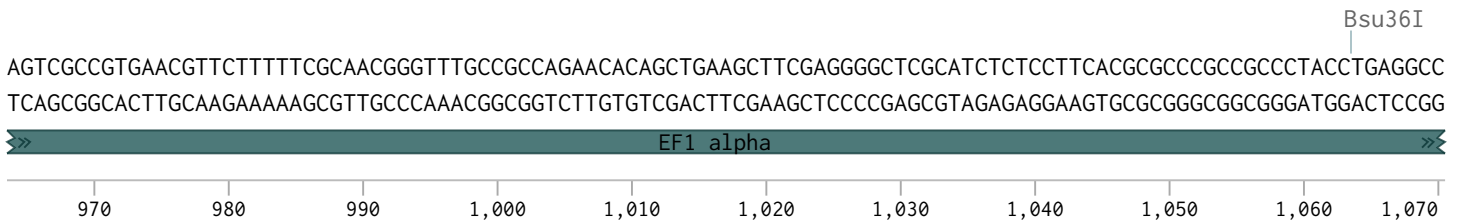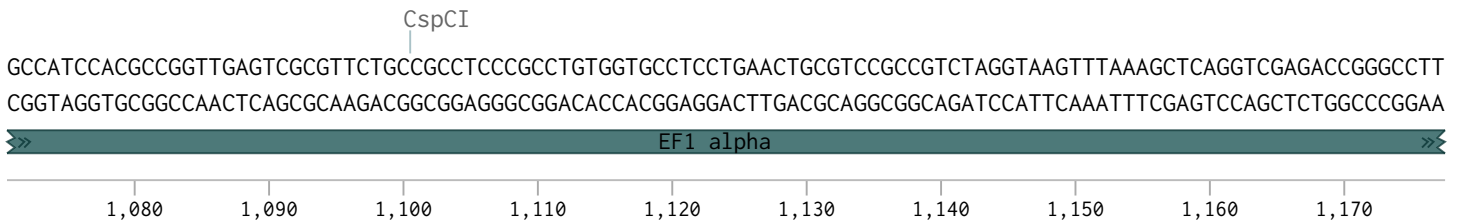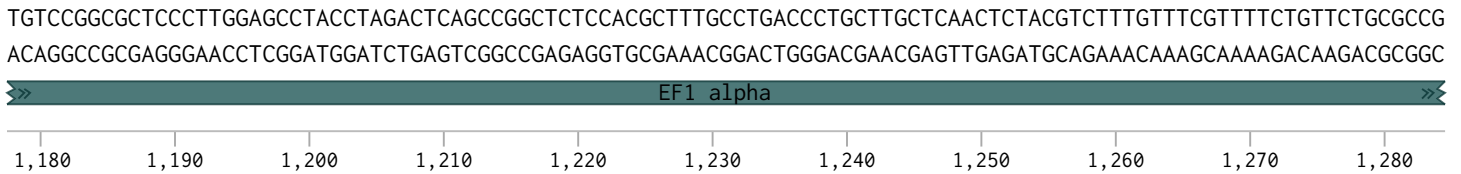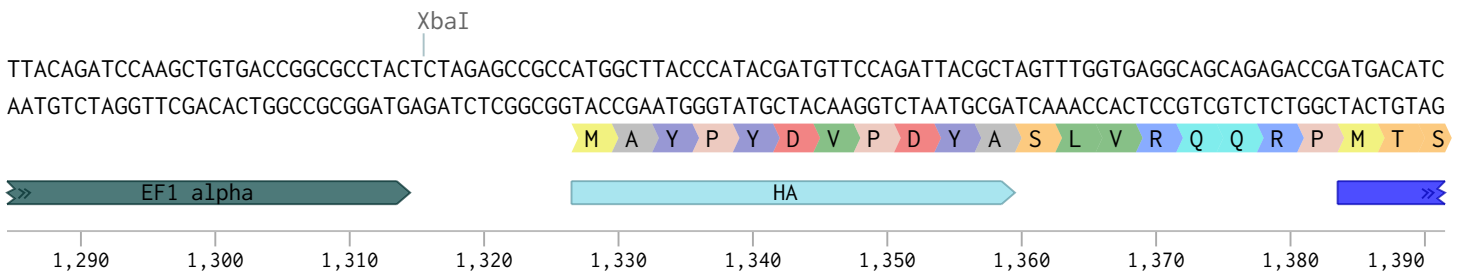



bArr1-HA-TEV219 pCDH-CuO-MCS-EF1 $\alpha$ -CymR-T2A-Bleo3 SparQ (10934 bp)

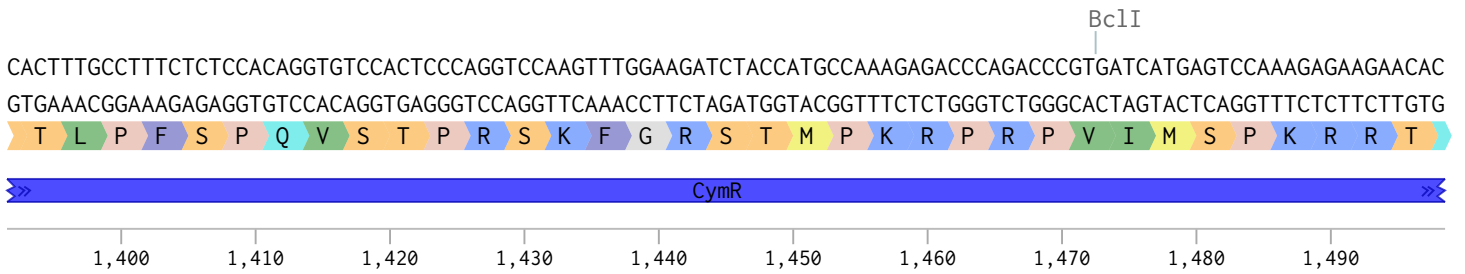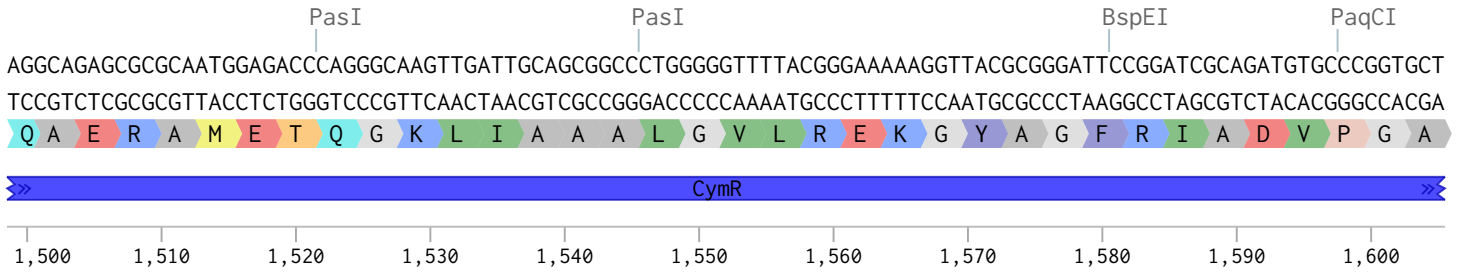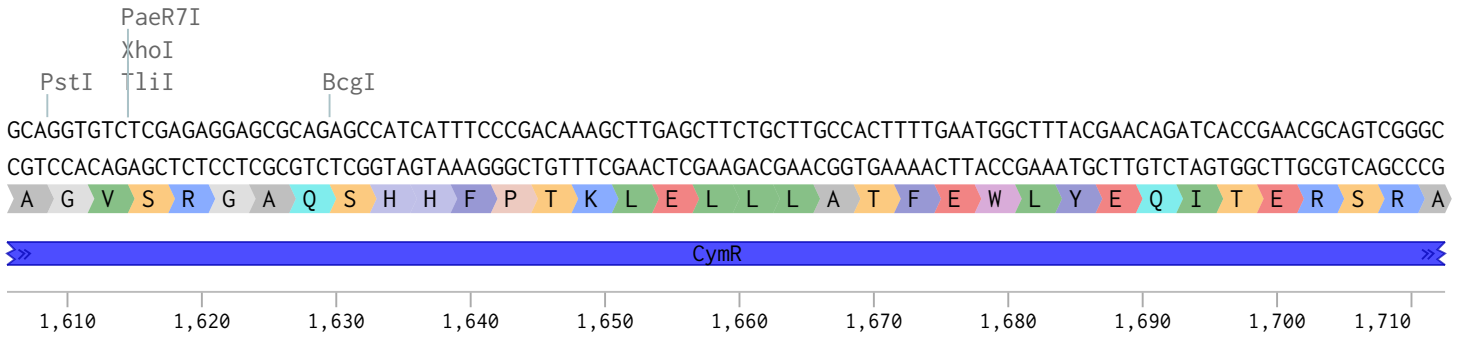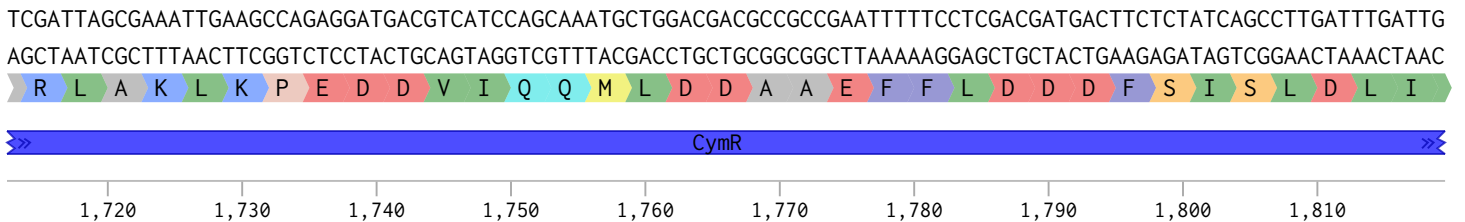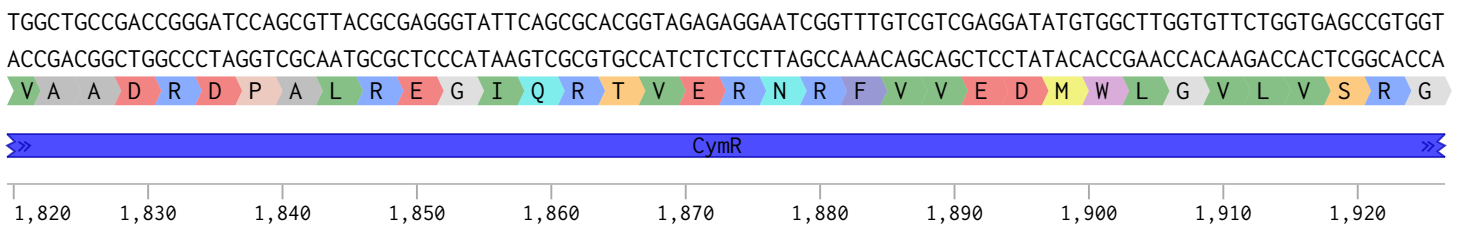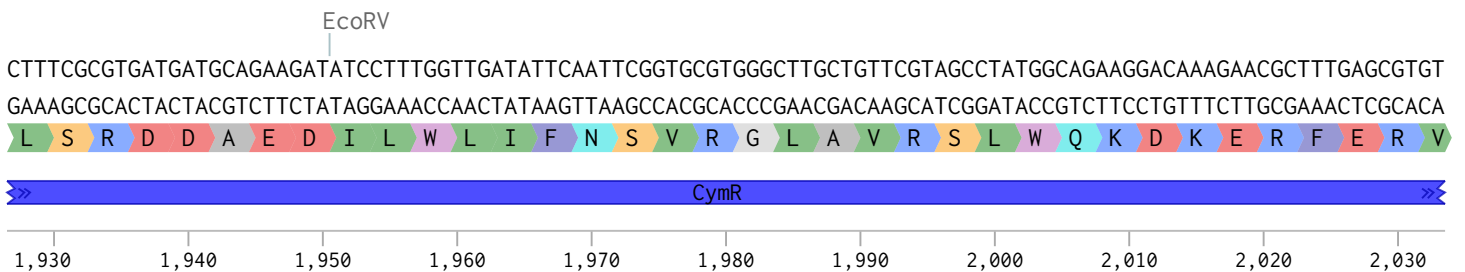

bArr1-HA-TEV219 pCDH-CuO-MCS-EF1 $\alpha$ -CymR-T2A-Bleo3 SparQ (10934 bp)

CAGGAACTCGACACTCGAAATTGCGCGAGAGCGGTACGCGAAATTC AAGCGCGCGCCAAACCCTCTGGCCGGTCTCTCTCTGTTTCGAGAGGGCAGAGGAAGTCTTC  
 GTCCTTGAGCTGTGAGCTTTAACGCGCTCTGCCATGCGCTTTAAGTTCGCGCGCCGTTGGGAGACCGGCCAGAGAGACAAGCTCTCCCGTCTCTTCAGAAG  
 R N S T L E I A R E R Y A K F K R A A K P S G

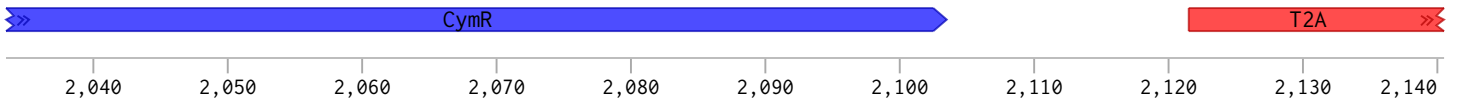

TAACATGCGGTGACGTGGAGGAGAATCCCGGCCCTGAATTCATGGCCAAGTTGACCAGTGCCGTTCCGGTGCTACCCGCGCGCAGCTCGCCGGAGCGGTTCGAGTTC  
 ATTGTACGCCACTGCACCTCTCTTAGGGCCGGGACTTAAGTACCGGTTCACTGGTACAGGCAAGGCCACAGAGTGGCGCGCTGCAGCGCCTCGCCAGCTCAAG  
 M A K L T S A V P V L T A R D V A G A V E F

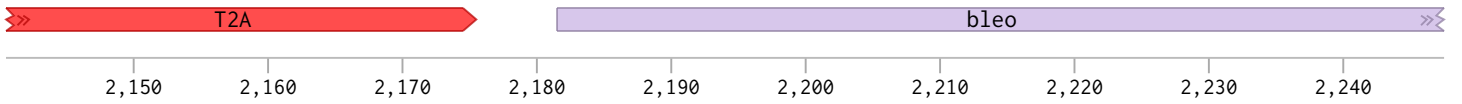

TGGACCGACCGGCTCGGGTCTCCCGGACTTCGTGGAGGACGACTTCGCGGTTGTGGTCCGGGACGACGTGACCCTGTTTCATCAGCGGGTCCAGGACCAGGTGGT  
 ACCTGGCTGGCCGAGCCAAGAGGGCCCTGAAGCACCTCTGCTGAAGCGGCCACACCAGGCCCTGCTGCACTGGGACAAGTAGTCGCGCCAGGTCCTGGTCCACCA  
 W T D R L G F S R D F V E D D F A G V V R D D V T L F I S A V Q D Q V V

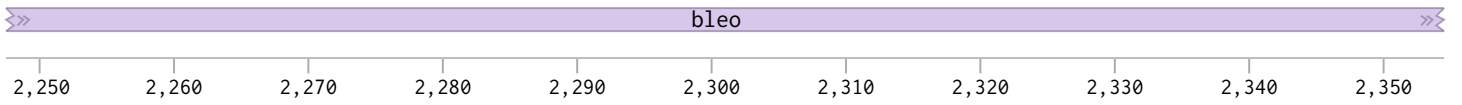

GCCGGACAACACCCTGGCTGGGTGTGGGTGCGCGGCTGGACGAGCTGTACGCCGAGTGGTCCGAGGTCGTGTCCACGAACCTCCGGGACGCCTCCGGGCCGGCCA  
 CGGCTGTTGTGGGACCGGACCACACCCACGCGCCGACTGCTCGACATGCGGCTCACCAGCCTCCAGCACAGGTGCTTGAAGGCCCTCGGAGGCCCGCCGGT  
 P D N T L A W V W V R G L D E L Y A E W S E V V S T N F R D A S G P A

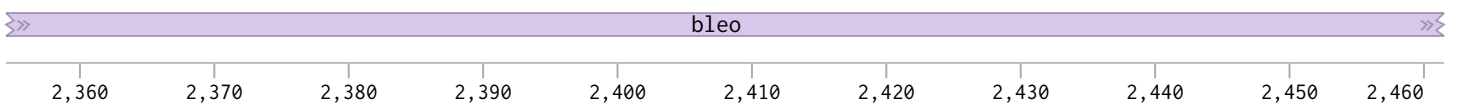

TGACCGAGATCGCGAGCAGCCGTGGGGCGGGAGTTCGCCCTGCGCGACCCGCGGCAACTGCGTGCCTTCGTGGCCGAGGAGCAGGACTGAGTCGACTCGACA  
 ACTGGCTCTAGCCGCTCGTCGACCCCCGCCCTCAAGCGGACGCGCTGGGCCGGCGTTGACGCACGTGAAGCACCAGGCTCCTCGTCTGACTCAGCTGAGCTGT  
 M T E I G E Q P W G R E F A L R D P A G N C V H F V A E E Q D \*

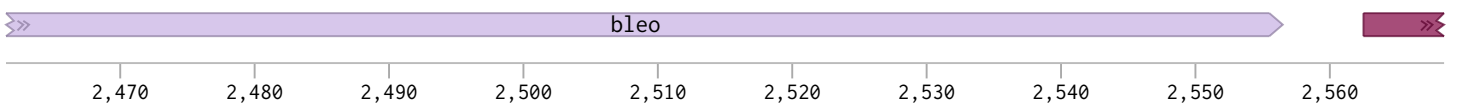

ATCAACCTCTGGATTACAAAATTTGTGAAAGATTGACTGGTATTCTTAACCTATGTTGCTCCTTTTACGCTATGTGGATACGCTGCTTTAATGCCTTTGTATCATGCT  
 TAGTTGGAGACCTAATGTTTTAAACACTTTCTAACTGACCATAAGAATTGATACAACGAGGAAAATGCGATACACCTATGCGACGAAATTCGAAACATAGTACGA

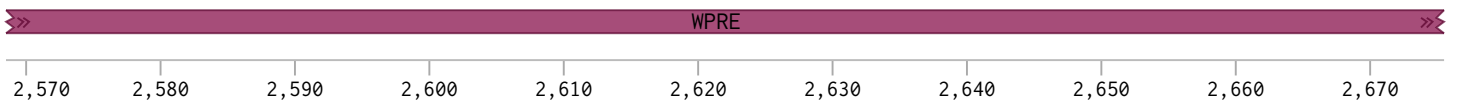

bArr1-HA-TEV219 pCDH-CuO-MCS-EF1 $\alpha$ -CymR-T2A-Bleo3 SparQ (10934 bp)

ATTGCTTCCCGTATGGCTTTTCATTTTCTCCTCCTTGATAAATCCTGGTTGCTGTCTCTTTATGAGGAGTTGTGGCCCGTTGTCAGGCAACGTGGCGTGGTGTGCAC  
TAACGAAGGGCATAACCGAAAGTAAAAGAGGAGGAACATATTTAGGACCAACGACAGAGAAATACTCCTCAACACCGGGCAACAGTCCGTTGCACCGCACCACACGTG

» WPRE »

2,680 2,690 2,700 2,710 2,720 2,730 2,740 2,750 2,760 2,770 2,780

TGTGTTTGTGACGCAACCCCACTGGTTGGGGCATTGCCACCACCTGTCAGCTCCTTTCCGGGACTTTTCGCTTTCCCCCTCCCTATTGCCACGGCGGAACTCATCG  
ACACAAACGACTGCGTTGGGGGTGACCAACCCCGTAACGGTGGTGGACAGTCGAGGAAAGGCCCTGAAAGCGAAAGGGGGAGGGATAACGGTGCCTGCTTGTAGTAGC

» WPRE »

2,790 2,800 2,810 2,820 2,830 2,840 2,850 2,860 2,870 2,880

CCGCTGCCTTGCCCGTCTGGACAGGGGCTCGGCTGTTGGGCACTGACAATCCGTGGTGTGTCGGGAAATCATCGTCTTTCTTTGGCTGCTCGCCTGTGTT  
GGCGGACGGAACGGGCGACGACCTGTCCCGAGCCGACAACCCGTGACTGTTAAGGCACCACAACAGCCCTTTAGTAGCAGGAAAGGAACCGACGAGCGGACACAA

» WPRE »

2,890 2,900 2,910 2,920 2,930 2,940 2,950 2,960 2,970 2,980 2,990

GCCACCTGGATTCTGCGCGGGACGTCCTTCTGCTACGTCCCTTCGGCCCTCAATCCAGCGGACCTTCTTCCCGCGGCTGCTGCCGGCTCTGCGGCCTTCCGGC  
CGGTGGACCTAAGACGCGCCCTGCAGGAAGACGATGCAGGGAAGCCGGGAGTTAGGTCGCTGGAAGGAAGGCGCCGACGACGGCCGAGACCGCGAGAAGGCCG

» WPRE »

3,000 3,010 3,020 3,030 3,040 3,050 3,060 3,070 3,080 3,090 3,100

TCTTCGCTTCGCCCTCAGACGAGTCGGATCTCCCTTTGGCCGCCTCCCGCCTGGTACCTTTAAGACCAATGACTTACAAGGCAGCTGTAGATCTTAGCCACTTT  
AGAAGCGGAAGCGGGAGTCTGCTCAGCCTAGAGGGAAACCCGGCGGAGGGGCGGACCATTGAAATTTCTGTTACTGAATGTTCCGTCGACATCTAGAATCGGTGAAA

» WPRE »

KpnI  
Acc65I

3,110 3,120 3,130 3,140 3,150 3,160 3,170 3,180 3,190 3,200 3,210

TTAAAAGAAAAGGGGGACTGGAAGGGCTAATCACTCCCAACGAAGATAAGATCTGCTTTTTGCTTGTACTGGTCTCTGTTAGACCAGATCTGAGCCTGGGA  
AATTTTCTTTCCCCCTGACCTTCCCGATTAAGTGAGGGTTGCTTCTATTCTAGACGAAAAACGAACATGACCCAGAGAGACCAATCTGGTCTAGACTCGGACCCT

3'LTR »

3,220 3,230 3,240 3,250 3,260 3,270 3,280 3,290 3,300 3,310

GCTCTGGCTAACTAGGGAACCCACTGCTTAAGCCTCAATAAAGCTTGCCTTGAGTGCTTCAAGTAGTGTGTGCCGCTGTTGTGTGACTCTGGTAACTAGAGAT  
CGAGAGACCGATTGATCCCTTGGGTGACGAATTCGGAGTTATTTGAAACGGAACCTCACGAAGTTCATCACACACGGGACAGACAACACTGAGACCATTGATCTCTA

» 3'LTR »

3,320 3,330 3,340 3,350 3,360 3,370 3,380 3,390 3,400 3,410 3,420

CCCTCAGACCCTTTTAGTCAGTGTGAAAAATCTCTAGCAGTAGTAGTTCATGTCATCTTATTATTAGTATTTATAACTTGCAAAGAAATGAATATCAGAGAGTGAG  
GGGAGTCTGGAAAAATCAGTCACACCTTTAGAGATCGTCATCATCAAGTACAGTAGAATAATAAGTCATAAATATTGAACGTTTCTTTACTTATAGTCTCTCACTC

» 3'LTR »

3,430 3,440 3,450 3,460 3,470 3,480 3,490 3,500 3,510 3,520 3,530

bArr1-HA-TEV219 pCDH-CuO-MCS-EF1 $\alpha$ -CymR-T2A-Bleo3 SparQ (10934 bp)

AGGAACTTGTATTATGCAGCTTATAATGGTTACAATAAAGCAATAGCATCACAAATTCACAAATAAAGCATTTTTTCACTGCATTCTAGTTGTGGTTTGTCCAA  
TCCTTGAACAAATAACGTCGAATATTACCAATGTTTATTTTCGTTATCGTAGTGTTTAAAGTGTATTTTCGTAAAAAAGTGACGTAAGATCAACACCAAACAGTT

SV40 Polyadenylation signal

3,540 3,550 3,560 3,570 3,580 3,590 3,600 3,610 3,620 3,630

ACTCATCAATGTATCTTATCATGTCTGGCTCTAGCTATCCCGCCCCTAACTCCGCCATCCCGCCCCTAACTCCGCCAGTTCCGCCATTCTCCGCCCATGGCTG  
TGAGTAGTTACATAGAATAGTACAGACCGAGATCGATAGGGCGGGGATTGAGGCGGGTAGGGCGGGATTGAGGCGGGTCAAGGCGGGTAAAGGCGGGTACCGAC

SV40 Polyad...ion signal

SV40 Ori

3,640 3,650 3,660 3,670 3,680 3,690 3,700 3,710 3,720 3,730 3,740

SfiI

ACTAATTTTTTTTATTTATGCAGAGGCCGAGGCCCTCGGCTCTGAGCTATTCCAGAAGTAGTGAGGAGCTTTTTGGAGGCTAGACTTTTGCAGAGACCAA  
TGATTAATAAATAAATACGCTCTCCGGCTCCGGCGGAGCCGAGACTCGATAAGGTCTTCATCACTCTCCGAAAAAACCCTCCGATCTGAAAACGTCTCTGGTTT

SV40 Ori

3,750 3,760 3,770 3,780 3,790 3,800 3,810 3,820 3,830 3,840 3,850

TTCGTAATCATGTCATAGCTGTTTCTGTGTGAAATTGTTATCCGCTCACAAATCCACACAACATACGAGCCGGAAGCATAAAGTGTAAGCCTGGGGTGCCTAATG  
AAGCATTAGTACAGTATCGACAAAGGACACACTTAAACAATAGGCGAGTGTTAAGGTGTGTTGTATGCTCGGCTTCGTATTTACATTTTCGACCCACGGATTAC

3,860 3,870 3,880 3,890 3,900 3,910 3,920 3,930 3,940 3,950

AGTGAGCTAACTCACATTAATTGCGTTGCGCTCACTGCCGCTTTCAGTCGGGAAACCTGTCGTGCCAGCTGCATTAATGAATCGCCAACGCGGGGAGAGGCG  
TCACTCGATTGAGTGAATTAACGCAACGCGAGTGACGGGCGAAAGTTCAGCCCTTTGGACAGCACGGTTCGACGTAATTAAGTTCGCGTTCGCGCCCTCTCCGC

3,960 3,970 3,980 3,990 4,000 4,010 4,020 4,030 4,040 4,050 4,060

BspQI

SapI

GTTTTCGATTGGGCGCTTTCGCTTCTCGCTCACTGACTCGCTGCGCTCGGTCGTTTCGGCTGCGGCGAGCGGTATCAGTCACTCAAAGGCGGTAATACGGTTA  
CAAACGCATAAACCCGCGAGAAGGCGAAGGAGCGAGTGACTGAGCGACGCGAGCCAGCAAGCCGACCGCTCGCCATAGTTCGAGTGAGTTTCCGCCATTATGCCAAT

4,070 4,080 4,090 4,100 4,110 4,120 4,130 4,140 4,150 4,160 4,170

AflIII

PciI

TCCACAGAATCAGGGATAACGCAGGAAAGAATGTGAGCAAAAGCCAGCAAAAGCCAGGAACCGTAAAAAGGCCGCTTGGTGGCGTTTTTCCATAGGCTCCG  
AGGTGTCTTAGTCCCTATTGCGTCTTTCTTGTACTCTGTTTTCCGGTCTTTCCGGTCTTTGGCATTTCGCGCGCAACGACCGCAAAAAGGTATCCGAGGC

pUC ori

4,180 4,190 4,200 4,210 4,220 4,230 4,240 4,250 4,260 4,270 4,280

CCCCCTGACGAGCATCACAAAATCGACGCTCAAGTCAGAGGTGGCGAAACCCGACAGGACTATAAAGATACCAGGCGTTTCCCCTGGAAGCTCCCTCGTGCCT  
GGGGGACTGCTCGTAGTGTTTTAGCTGCGAGTTCAGTCTCCACCGCTTTGGGCTGTCTGATATTTCTATGGTCCGCAAGGGGACCTTCGAGGGAGCACCGCA

pUC ori

4,290 4,300 4,310 4,320 4,330 4,340 4,350 4,360 4,370 4,380

bArr1-HA-TEV219 pCDH-CuO-MCS-EF1 $\alpha$ -CymR-T2A-Bleo3 SparQ (10934 bp)

CTCCTGTTCCGACCCTGCCGCTTACCGGATACCTGTCCGCTTTCTCCCTTCGGAAGCGTGGCGCTTTCTCATAGCTCAGCTGTAGGTATCTCAGTTCGGTGTAG  
GAGGACAAGGCTGGGACGGCGAATGGCCTATGGACAGGCGGAAAGAGGGAAGCCCTTCGCACCGCGAAAGAGTATCGAGTGCACATCCATAGAGTCAAGCCACATC

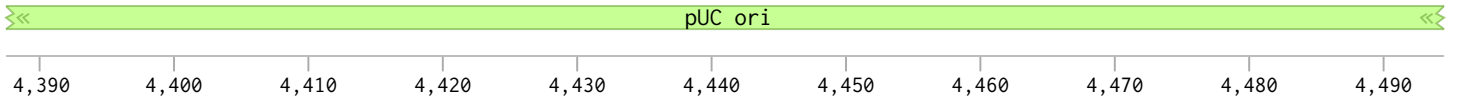

GTCGTTTCGCTCCAAGCTGGGCTGTGTGCACGAACCCCCGTTACGCCGACCCTGCGCCTTATCCGGTAACTATCGTCTTGAGTCCAACCCGGTAAGACACGACTT  
CAGCAAGCGAGGTTCCGACCCGACACACGTGCTTGGGGGCAAGTCGGGCTGGCGACGCGGAATAGGCCATTGATAGCAGAACTCAGTTGGGCCATTCTGTGCTGAA

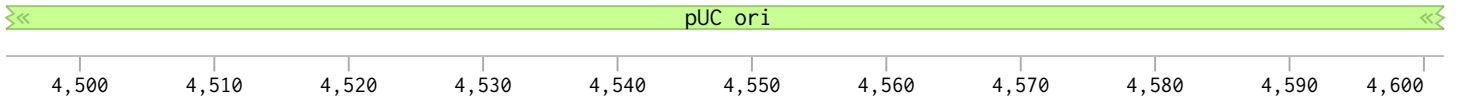

ATCGCCACTGGCAGCAGCCACTGGTAACAGGATTAGCAGAGCGAGGTATGTAGCGGTGCTACAGAGTCTTGAAGTGGTGGCCTAACTACGGCTACACTAGAAGGA  
TAGCGGTGACCGTCGTCGGTGACCATTGTCTTAATCGTCTCGCTCCATACATCCGCCACGATGTCTCAAGAACTTACCACCGGATTGATGCCGATGTGATCTTCTC

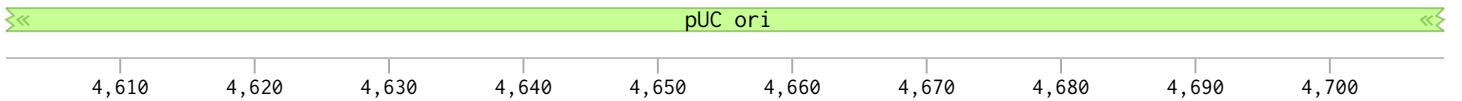

CAGTATTTGGTATCTGCGCTCTGCTGAAGCCAGTTACCTTCGAAAAAGAGTTGGTAGCTCTTGATCCGGCAAACAACCACCGCTGGTAGCGGTGGTTTTTTTGGT  
GTCATAAACCATAGACGCGAGACGACTTCGGTCAATGGAAGCCTTTTTCTCAACCATCGAGAACTAGGCCGTTTGGTTGGTGGCGACCATCGCCACCAAAAAACA

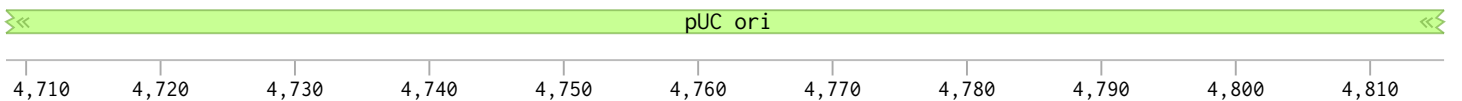

TGCAAGCAGCAGATTACGCGCAGAAAAAAGGATCTCAAGAAGATCCTTTGATCTTTTCTACGGGTCTGACGCTCAGTGAACGAAAACCTCACGTTAAGGGATTTT  
ACGTTTCGTCGCTAATGCGCGTCTTTTTTCTAGAGTTCTTCTAGGAACTAGAAAAGATGCCCCAGACTGCGAGTACCTTGTCTTTGAGTGAATTCCTAAAA

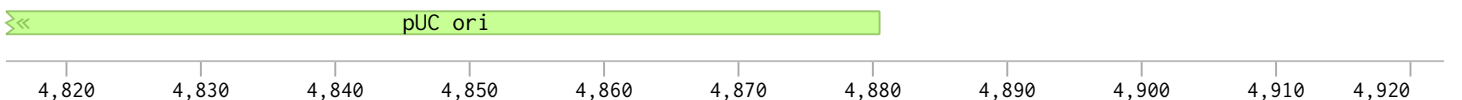

GGTCATGAGATTATCAAAAAGGATCTTACCTAGATCCTTTAAATTAATAAATGAAGTTTTAAATCAATCTAAAGTATATATGAGTAACTTGGTCTGACAGTTACC  
CCAGTACTCTAATAGTTTTTCTAGAAGTGGATCTAGGAAAATTAATTTTTACTTCAAATTTAGTTAGATTTTCATATATACTCATTTGAACCAGACTGTCAATGG

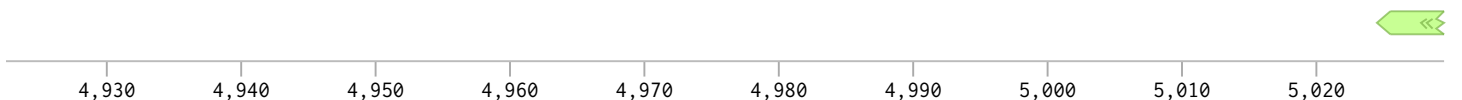

AATGCTTAATCAGTGAGGCACCTATCTCAGCGATCTGTCTATTTTCGTTTCATCCATAGTTGCCTGACTCCCCGTCGTGTAGATAACTACGATACGGGAGGGCTTACCA  
TTACGAATTAGTCACTCCGTGGATAGAGTCGCTAGACAGATAAAGCAAGTAGGTATCAACGGACTGAGGGGCAGCACATCTATTGATGCTATGCCCTCCCGAATGGT

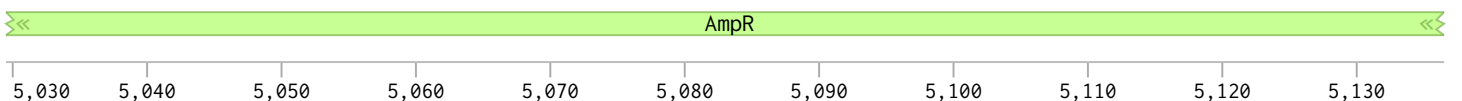

TCTGGCCCCAGTGCTGCAATGATACCGCGAGACCCACGCTCACCGGCTCCAGATTTATCAGCAATAAACCAGCCAGCCGGAAGGGCCGAGCGCAGAAGTGGTCTTGC  
AGACCGGGGTACGACGTTACTATGGCGCTCTGGGTGCGAGTGGCCGAGGTCTAAATAGTCGTTATTTGGTCGGTTCGCCCTTCCCGGCTCGCGTCTTACCAGGACG

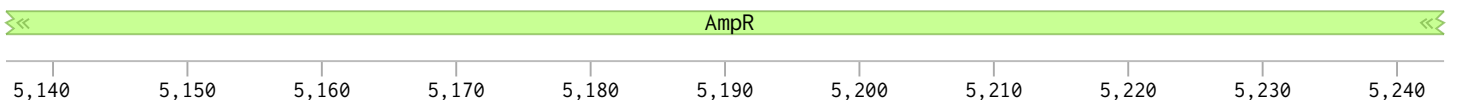

bArr1-HA-TEV219 pCDH-CuO-MCS-EF1 $\alpha$ -CymR-T2A-Bleo3 SparQ (10934 bp)

AACTTTATCCGCCTCCATCCAGTCTATTAATTGTTGCCGGGAAGCTAGAGTAAGTAGTTCGCCAGTTAATAGTTTGCACAACGTTGTTGCCATTGCTACAGGCATCG  
TTGAAATAGGCGGAGGTAGGTCAGATAATTAACAACGGCCCTTCGATCTCATTCAAGCGGTCAATTATCAAACGCGTTGCAACAACGGTAACGATGTCCGTAGC

FspI

Amplifier: AmpR

5,250 5,260 5,270 5,280 5,290 5,300 5,310 5,320 5,330 5,340 5,350

TGGTGTACGCTCGTCGTTTGGTATGGCTTCATTAGCTCCGGTCCCAACGATCAAGGCGAGTTACATGATCCCCATGTTGTGCAAAAAAGCGGTTAGCTCCTTC  
ACCACAGTGCAGCAGCAAACCATAACGAAGTAAGTCGAGGCCAAGGTTGCTAGTTCGGCTCAATGACTAGGGGGTACAACACGTTTTTTCGCCAATCGAGGAAG

Amplifier: AmpR

5,360 5,370 5,380 5,390 5,400 5,410 5,420 5,430 5,440 5,450

GGTCTCCGATCGTTGTCAGAAGTAAGTTGGCCGAGTGTATCACTCATGGTTATGGCAGCACTGCATAATTCTTACTGTCATGCCATCCGTAAGATGCTTTTC  
CCAGGAGGTAGCAACAGTCTTCAATCAACCGCGTCACAATAGTGAGTACCAATACCGTCGTGACGTATTAAGAGAATGACAGTACGGTAGGCATTCTACGAAAAG

Amplifier: AmpR

5,460 5,470 5,480 5,490 5,500 5,510 5,520 5,530 5,540 5,550 5,560

TGTGACTGGTGAGTACTCAACCAAGTCATTCTGAGAATAGTGTATGCGGCGACCGAGTTGCTCTTGCCCGCGTCAATACGGGATAATACCGGCCACATAGCAGAA  
ACACTGACCACTCATGAGTTGGTTTCAGTAAGACTCTTATCACATACGCCGTGGCTCAACGAGAACGGGCCGAGTTATGCCCTATTATGGCGCGGTGATCGTCTT

BcgI

Amplifier: AmpR

5,570 5,580 5,590 5,600 5,610 5,620 5,630 5,640 5,650 5,660 5,670

CTTTAAAAGTGCTCATCATTGGAAAACGTTCTTCGGGGCGAAAACCTCAAGGATCTTACCGCTGTTGAGATCCAGTTCGATGTAACCCACTCGTGACCCAACTGA  
GAAATTTTACAGGAGTAGTAACCTTTTGAAGAAGCCCCGCTTTTGAGAGTTCTAGAATGGCGACAACCTCTAGGTCAAGCTACATTGGGTGAGCACGTGGGTTGACT

XmnI

Amplifier: AmpR

5,680 5,690 5,700 5,710 5,720 5,730 5,740 5,750 5,760 5,770

TCTTCAGCATCTTTTACTTTACCAGCGTTTCTGGGTGAGCAAAAACAGGAAGGCAAAAATGCCGCAAAAAGGGAATAAGGGCGACACGGAAATGTTGAATACTCAT  
AGAAGTCGTAGAAAATGAAAGTGGTCGAAAGACCCACTCGTTTTTGTCTCCGTTTTACGGCGTTTTTCCCTTATTCCCGCTGTGCCTTTACAACCTATGAGTA

Amplifier: AmpR

5,780 5,790 5,800 5,810 5,820 5,830 5,840 5,850 5,860 5,870 5,880

ACTCTTCCTTTTTCAATATTATTGAAGCATTATCAGGGTATTGTCTCATGAGCGGATACATATTTGAATGTATTTAGAAAAATAAACAATAGGGGTTCCGCGCA  
TGAGAAGGAAAAAGTTATAATAACTTCGTAATAGTCCCAATAACAGAGTACTCGCTATGTATAAACTTACATAAATCTTTTTATTTGTTTATCCCAAGGCGCGT

SspI

5,890 5,900 5,910 5,920 5,930 5,940 5,950 5,960 5,970 5,980 5,990

CATTTCCCGAAAAGTGCCACCTGACGTCTAAGAAACCATTATTATCATGACATTAACCTATAAAAATAGGCGTATCACGAGGCCCTTTCGTCTCGCGGTTTCGGT  
GTAAGGGGCTTTTTCACGGTGGACTGCAGATTCTTGGTAATAATAGTACTGTAATTGGATTTTTATCCGCATAGTCTCCGGGAAAGCAGAGCGCGCAAAGCCA

6,000 6,010 6,020 6,030 6,040 6,050 6,060 6,070 6,080 6,090

bArr1-HA-TEV219 pCDH-CuO-MCS-EF1 $\alpha$ -CymR-T2A-Bleo3 SparQ (10934 bp)

GATGACGGTAAAAACCTCTGACACATGCAGCTCCCGGAGACGGTCACAGCTTGTCTGTAAAGCGGATGCCGGGAGCAGACAAGCCCGTCAGGGCGCGTCAGCGGGTGT  
CTACTGCCACTTTTGGAGACTGTGTACGTCGAGGGCCTCTGCCAGTGTGCAACAGACATTGCGCTACGGCCCTCGTCTGTTCCGGCAGTCCCGCGCAGTCGCCCA

TGGCGGGTGTGGGGCTGGCTTAACTATGCGGCATCAGAGCAGATTGTAAGAGAGTGCACCATATGCGGTGTGAAATACCGCACAGATGCGTAAGGAGAAAATACC  
ACGCCACAGCCCCGACCGAATTGATACGCCGTAGTCTCGTCTAACATGACTCTCACGTGGTATACGCCACACTTTATGGCGTGTCTACGCATTCTCTTTTATGG

GCATCAGGCGCCATTGCCATTAGGCTGCGCAACTGTTGGGAAGGGCGATCGGTGCGGGCCTCTTCGTATTACGCCAGCTGGCGAAAGGGGGATGTGCTGCAAGG  
CGTAGTCCGCGTAAGCGGTAAGTCCGACGCGTTGACAACCTTCCCGCTAGCCACGCCCCGAGAAGCGATAATGCGGTGACCGCTTTCCCCCTACACGACGTTCC

CGATTAAGTTGGTAACGCCAGGGTTTTCCAGTCACGACGTTGTAACACGACGGCCAGTGCCAAGCTGACGCGTGTAGTCTTATGCAATACTCTTGTAGTCTTGCA  
GCTAATCAACCCATTGCGGTCCAAAAGGGTCAGTGTGCAACATTTTGTGCGCGTCACGGTTCGACTGCGCACATCAGAATACGTTATGAGAATCAGAACGT

ACATGGTAACGATGAGTTAGCAACATGCCTTACAAGGAGAGAAAAAGCACCGTGCATGCCGATTGGTGGAAAGTAAGGTGGTACGATCGTGCCTTATTAGGAAGGCAA  
TGTACCATTGCTACTCAATCGTTGTACGGAATGTTCTCTCTTTTTCGTGGCAGTACGGCTAACACCTTCATTCCACCATGCTAGCACGGAATAATCTTCCGTT

CAGACGGTCTGACATGGATTGGACGAACCACTGAATTGCCGATTGCAGAGATATTGTATTTAAGTGCCTAGCTCGATACATAAACGGGTCTCTCTGGTTAGACCA  
GTCTGCCAGACTGTACCTAACCTGCTTGGTGACTTAACGGCGTAACGTTCTATAACATAAATTCACGGATCGAGCTATGATTTGCCAGAGACCAATCTGGT

GATCTGAGCCTGGGAGCTCTCTGGCTAACTAGGGAACCACTGCTTAAGCCTCAATAAAGCTTGCCTTGAGTGTCAAGTAGTGTGTGCCGTCTGTTGTGTGACT  
CTAGACTCGGACCCTCGAGAGACCGATTGATCCCTTGGGTGACGAATTCGGAGTTATTTGAAACGGAACCTCACGAAGTTCATCACACAGGGCAGACAACACACTGA

CTGGTAACTAGAGATCCCTCAGACCCTTTTAGTCAGTGTGAAAATCTCTAGCAGTGGCGCCGAACAGGGACTTGAAAGCGAAAGGAAACCAGAGGAGCTCTCTC  
GACCATTGATCTCTAGGGAGTCTGGGAAAATCAGTCACACCTTTTAGAGATCGTCACCGGGCTGTCCCTGAACTTTGCTTTCCCTTTGGTCTCTCGAGAGAG

bArr1-HA-TEV219 pCDH-CuO-MCS-EF1 $\alpha$ -CymR-T2A-Bleo3 SparQ (10934 bp)

GAGCAGGACTCGGCTTGTGAAGCGCGCACGGCAAGAGGGCGGGGGCGGCGACTGGTGTAGTACGCCAAAAATTTTGACTAGCGGAGGCTAGAAGGAGAGAGATGGG  
CTGCGTCCTGAGCCGAACGACTTCGCGCGTGCCGTTCTCCGCTCCCCGCCGCTGACCACTCATGCGGTTTTTAAACTGATCGCCTCCGATCTTCTCTCTACCC

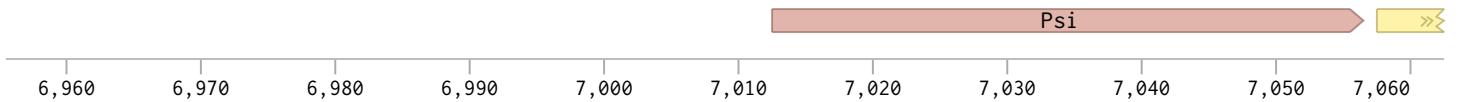

TGGGAGAGCGTCAAGTATTAAGCGGGGAGAATTAGATCGCGATGGGAAAAAATTCGGTTAAGCCAGGGGAAAGAAAAATATAAATTAACATATAGTATGGGC  
ACGCTCTCGCAGTCATAATTCGCCCTCTTAATCTAGCGCTACCCTTTTTAAGCCAATTCGGTCCCCCTTCTTTTTATATTTAATTTGTATATCATAACCCG

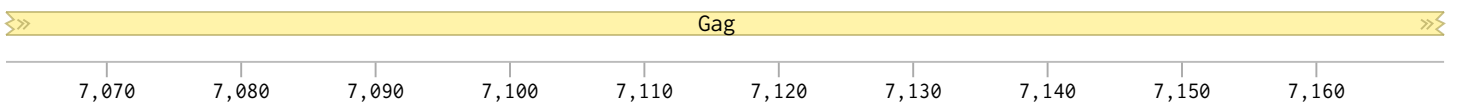

AAGCAGGGAGCTAGAACGATTCGCAGTTAATCCTGGCCTGTAGAAACATCAGAAGGCTGTAGACAAATACTGGGACAGCTACAACCATCCCTTCAGACAGGATCAG  
TTCGTCCCTCGATCTTGCTAAGCGTCAATTAGGACCGGACAATCTTTGTAGTCTCCGACATCTGTTATGACCCTGTGATGTTGGTAGGGAAGTCTGCTCTAGTC

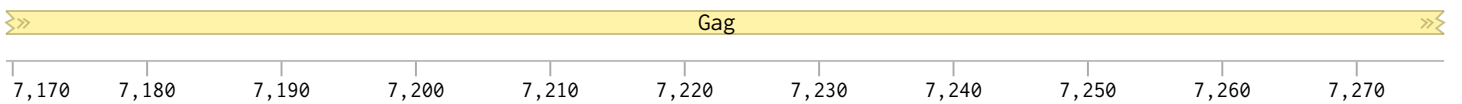

AAGAACTTAGATCATTATATAATACAGTAGCAACCTCTATTGTGTGCATCAAGGATAGAGATAAAGACACCAAGGAAGCTTTAGACAAGATAGAGGAAGAGCAA  
TTCTTGAATCTAGTAATATATTATGTCATCGTTGGGAGATAACACACGTAGTTTCTATCTCTATTTCTGTGGTCCCTCGAAATCTGTTCTATCTCTCTCTCGTT

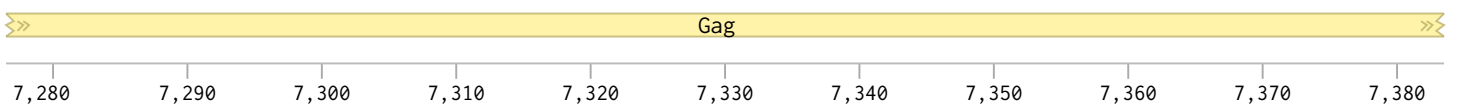

AACAAAAGTAAGACCACCGCACAGCAAGCGGCCACTGATCTTCAGACCTGGAGGAGGAGATATGAGGGACAATTGGAGAAGTGAATTATATAAATATAAAGTAGTAA  
TTGTTTTTCTTCTGGTGGCGTGTGTTCCCGGTGACTAGAAGTCTGGACCTCCTCTCTATACTCCCTGTTAACCTCTTCACTTAATATATTTATATTTTCATCATT

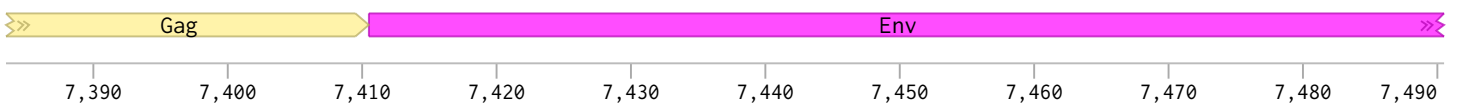

AAATTGAACCATTAGGAGTAGCACCCACCAAGGCAAAGAGAAGAGTGGTGCAGAGAGAAAAAGAGCAGTGGGAATAGGAGCTTTGTTCTTGGGTTCTTGGGAGCA  
TTTAACTTGGTAATCCTCATCGTGGTGGTCCGTTTCTTCTCTACCACGTCTCTTTTTCTCGTCACCTTATCCTCGAAACAAGGAACCAAGAACCCTCGT

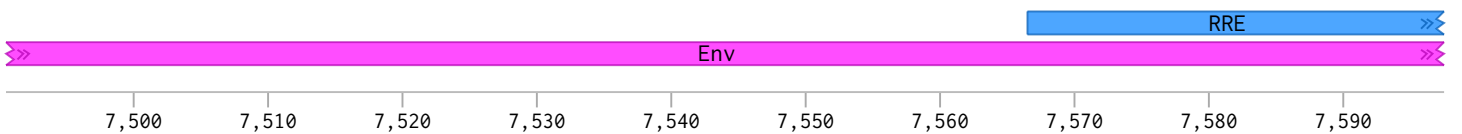

GCAGGAAGCACTATGGGCGCAGCGTCAATGACGCTGACGGTACAGGCCAGACAATTATTGTCTGGTATAGTGCAGCAGCAGAACAATTTGCTGAGGGCTATTGAGGC  
CGTCTTCGTGATACCCGCGTCGAGTACTGCGACTGCCATGTCCGGTCTGTTAATAACAGACCATATCACGTCGTCGTTGTTAAACGACTCCCGATAACTCCG

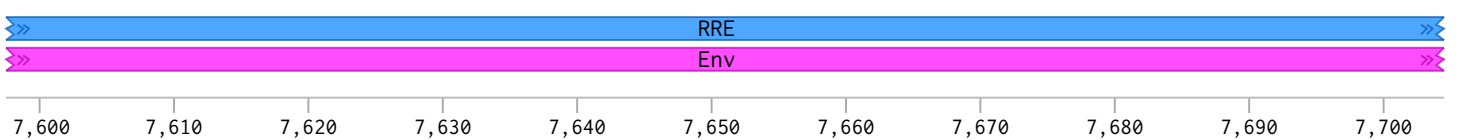



bArr1-HA-TEV219 pCDH-CuO-MCS-EF1 $\alpha$ -CymR-T2A-Bleo3 SparQ (10934 bp)

GCAACAGCATCTGTTGCAACTCACAGTCTGGGGCATCAAGCAGCTCCAGGCAAGAATCCTGGCTGTGAAAGATACCTAAAGGATCAACAGCTCCTGGGGATTGGG  
CGTTGTCGTAGACAACGTTGAGTGTGACACCCCGTAGTTCGTGAGGTCGGTCTTAGGACCGACACCTTTCTATGGATTTCTAGTTGTCGAGGACCCCTAAACCC

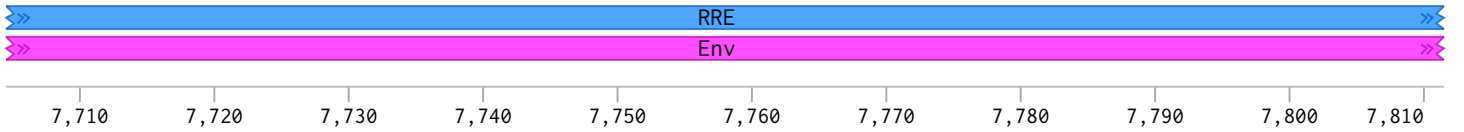

GTTGCTCTGGAAAACATTTGCACCACTGCTGTGCCTTGAATGCTAGTTGGAGTAATAAATCTCTGGAACAGATTTGGAATCACACGACCTGGATGGAGTGGGAC  
CAACGAGACCTTTTGTAGTAAACGTTGGTACGACACGGAACCTTACGATCAACCTCATTATTTAGAGACCTTGTCTAAACCTTAGTGTGCTGGACCTACCTCACCTG

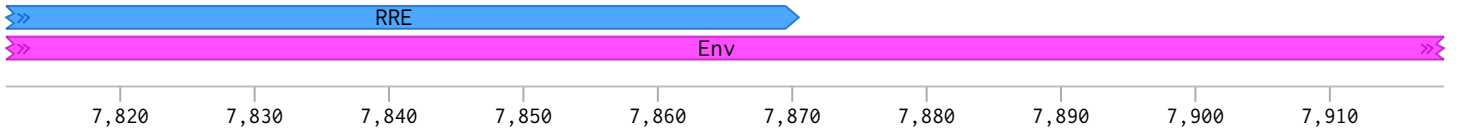

AGAGAAATTAACAATTACACAAGCTTAATACACTCCTTAATGAAGAATCGCAAACCAGCAAGAAAAGAATGAACAAGAATTATTGGAATTAGATAAATGGGCAAGT  
TCTCTTAATGTTAATGTGTTGCAATTATGTGAGGAATTAACCTTCTAGCGTTTGGTCGTTCTTTCTTACTTGTCTTAATAACCTTAATCTATTTACCCGTTCA

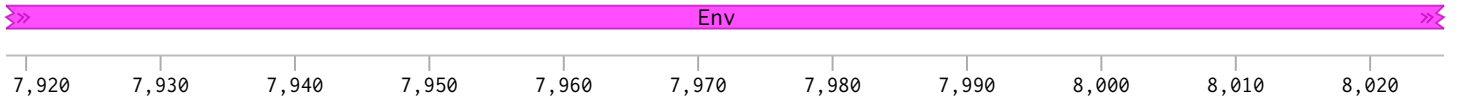

TTGTGAATTGGTTTAAACATAACAAATGGCTGTGGTATATAAAATTAATTCATAATGATAGTAGGAGGCTTGGTAGGTTTAAAGAATAGTTTTGCTGTACTTTCTAT  
AACACCTTAACCAAATTGTATTGTTTAAACCGACACCATATATTTAAAGTATTACTATCATCTCCGAACCATCAAATTCTTATCAAAAACGACATGAAAGATA

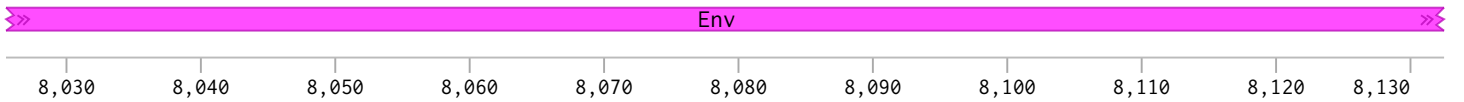

AGTGAATAGAGTTAGGCAGGGATATTCACCATTATCGTTTCAGACCCACCTCCCAACCCCGAGGGGACCCGACAGGCCCGAAGGAATAGAAGAAGAAGGTGGAGAGA  
TCACTTATCTCAATCCGTCCTATAAGTGGTAATAGCAAAGTCTGGGTGGAGGGTTGGGGCTCCCTGGGCTGTCCGGGCTTCTTATCTTCTTCCACCTCTCT

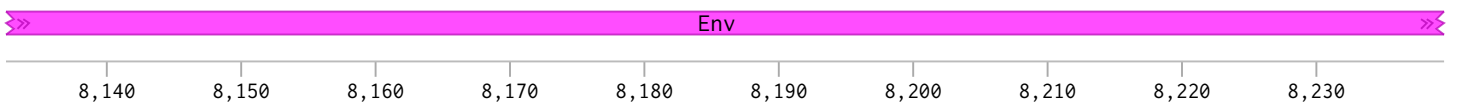

GAGACAGAGACAGATCCATTGATTAGTGAACGGATCTCGACGGTATCGGTTAACTTTTAAAAGAAAAGGGGGGATTGGGGGTACAGTGCAGGGGAAAGAATAGTA  
CTCTGTCTGTCTAGGTAAGCTAATCACTTGCCTAGAGCTGCCATAGCCAATTGAAAATTTCTTTTCCCCCTAACCCCTATGTCACGTCCCCTTTCTTATCAT

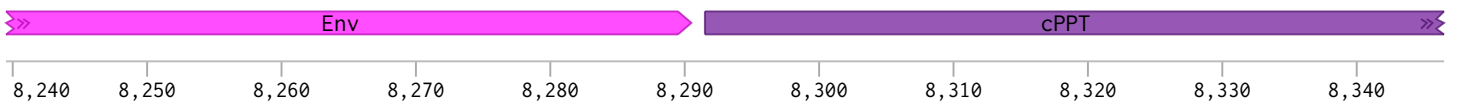

GACATAATAGCAACAGACATACAACTAAAGAATTACAAAAACAAATTACAAAATTTCAAATTTTATCGATAGACTAGTTATTAATAGTAATCAATTACGGGGTCAT  
CTGTATTATCGTTGCTGTATGTTGATTCTTAATGTTTTGTTAATGTTTTAAGTTTTAAAATAGCTATCTGATCAATAATTATCATTAGTTAATGCCCCAGTA

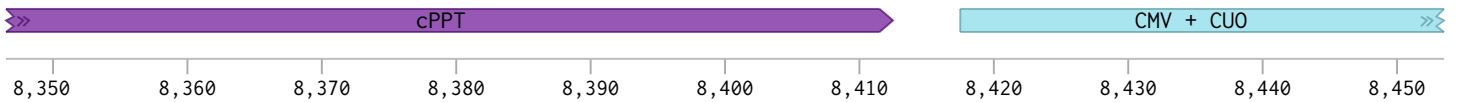

bArr1-HA-TEV219 pCDH-CuO-MCS-EF1 $\alpha$ -CymR-T2A-Bleo3 SparQ (10934 bp)

TAGTTCATAGCCCATATATGGAGTTCCGCGTTACATAAATTACGGTAAATGGCCCGCCTGGCTGACCGCCCAACGACCCCGCCATTGACGTCAATAATGACGTAT  
ATCAAGTATCGGGTATATACCTCAAGGCGCAATGTATTGAATGCCATTTACCGGGCGGACCGACTGGCGGGTTGCTGGGGGCGGGTAAGTGCAGTTATTACTGCATA

CMV + CUO

8,460 8,470 8,480 8,490 8,500 8,510 8,520 8,530 8,540 8,550 8,560

GTTCCCATAGTAACGCCAATAGGGACTTTCCATTGACGTCAATGGGTGGAGTATTTACGGTAAACTGCCACTTGGCAGTACATCAAGTGTATCATATGCCAAGTCC  
CAAGGGTATCATTGCGGTTATCCCTGAAAGGTAAGTGCAGTTACCCACCTCATAAATGCCATTTGACGGGTGAACCGTCATGTAGTTCACATAGTATACGGTTCAGG

CMV + CUO

8,570 8,580 8,590 8,600 8,610 8,620 8,630 8,640 8,650 8,660

GCCCCCTATTGACGTCAATGACGGTAAATGGCCCGCCTGGCATTATGCCCAGTACATGACCTTACGGGACTTTCCTACTTGGCAGTACATCTACGTATTAGTCATCG  
CGGGGATAACTGCAGTTACTGCCATTTACCGGGCGGACCGTAATACGGGTACTGACTGGAATGCCCTGAAAGGATGAACCGTCATGTAGATGCATAATCAGTAGC

CMV + CUO

8,670 8,680 8,690 8,700 8,710 8,720 8,730 8,740 8,750 8,760 8,770

CTATTACCATGGTGTATGCGGTTTTGGCAGTACACCAATGGGCGTGGATAGCGTTTTGACTCACGGGGATTTCCAAGTCTCCACCCATTGACGTCAATGGGAGTTTG  
GATAATGGTACCACTACGCCAAAACCGTCATGTGGTTACCCGCACCTATCGCCAAAAGTACTGAGTCCCTAAAGGTTTACAGAGGTGGGGTAAGTGCAGTTACCTCAAAC

CMV + CUO

8,780 8,790 8,800 8,810 8,820 8,830 8,840 8,850 8,860 8,870 8,880

TTTTGGCACCAAAATCAACGGGACTTTCCAAAATGTCGTAATACCCCCGCCCCGTTGACGCAAAATGGGCAAGCTTGCCGGGTGAGGTAGGCGTGTACGGTGGGAGG  
AAAACCGTGGTTTTAGTTGCCCTGAAAGGTTTTACAGCATTATGGGGGCGGGGCAACTGCGTTTACCGTTTGAACGGCCAGCTCCATCCGCACATGCCACCCTCC

CMV + CUO

8,890 8,900 8,910 8,920 8,930 8,940 8,950 8,960 8,970 8,980

CCTATATAAGCAACCGGTATAATCAAACAGACCAGATTGTCTGTTTGTACCGGTGTTTAGTGAACCGGGCGCGCCTCATATCGCTGGAGACGCCATCCACGCTGT  
GGATATATTCGTTGGCCATATTAGTTTGTCTGGTCTAACAGACAAACAATGGCCACAAATCACTTGGCCCGCGGAGTATAGCGGACCTCTGCGGTAGGTGCGACA

CMV + CUO

8,990 9,000 9,010 9,020 9,030 9,040 9,050 9,060 9,070 9,080 9,090

TTTGACCTCCATAGAAGACACCGGGACCGATCCAGCCTCCGCGGTCACTCTTCCGCATCGCTGTCTGCGAGGGCCAGCTGTTGGGCTCGCGGTTGAGGACAAACT  
AAACTGGAGGTATCTTCTGTGGCCTGGCTAGGTCGGAGGCCAGTGAGAGAAGGCGTAGCGACAGACGCTCCCGGTGCAACAACCGAGCGCCAACCTCTGTTTGA

CMV + CUO

9,100 9,110 9,120 9,130 9,140 9,150 9,160 9,170 9,180 9,190 9,200

bArr1-HA-TEV219 pCDH-CuO-MCS-EF1 $\alpha$ -CymR-T2A-Bleo3 SparQ (10934 bp)

CTTCGCGGTCTTTCCAGTACTCTTGATCGGAAACCCGTCGGCCTCCGAACGGTACTCCGCCACCGAGGGACCTGAGCGAGTCCGCATCGACCGGATCGGAAACCT  
GAAGCGCCAGAAAGTCCATGAGAACCTAGCCTTTGGGCAGCCGGAGGCTTGCCATGAGGCGGTGGCTCCCTGGACTCGCTCAGGCGTAGCTGGCCTAGCCTTTTGA

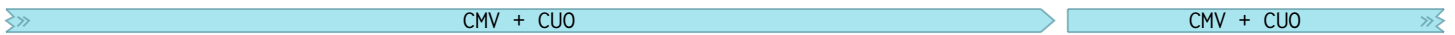

9,210 9,220 9,230 9,240 9,250 9,260 9,270 9,280 9,290 9,300

PaeR7I  
XhoI  
TliI

BlpI

CTCGAGAAAGCGTCTAACCAGTCACAGTCGCAAGGTAGGCTGAGCACCGTGCGGGCGGCAGCGGTTGGCGGTCGGGTTGTTTCTGGCGGAGGTGCTGCTGATGA  
GAGCTCTTTCCGAGATTGGTCAGTGTGACGCTTCCATCCGACTCGTGGCACC GCCCGCTGCCACC GCCCAGCCCCAACAAAGACCGCCTCCACGACGACTACT

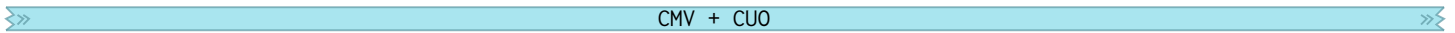

9,310 9,320 9,330 9,340 9,350 9,360 9,370 9,380 9,390 9,400 9,410

TGTAATTAAGTAGCGGTCTTGAGACGGCGGATGGTCGAGGTGAGGTGTGGCAGGCTTGAGATCCAGCTGTTGGGGTGAAGTACTCCCTCTCAAAGCGGGCATTAC  
ACATTAATTTCCATCCGCCAGA ACTCTGCCGCTACCAGCTCCACTCCACACCGTCCGA ACTCTAGGTCGACAACCCACTCATGAGGGAGAGTTTTCGCCGTAATG

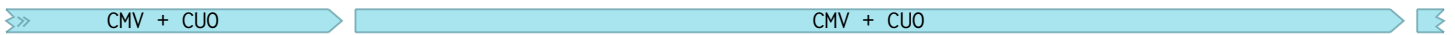

9,420 9,430 9,440 9,450 9,460 9,470 9,480 9,490 9,500 9,510 9,520

TTCTGCGCTAAGATTGTCAGTTTCAAAAACGAGGAGGATTTGATATTCACCTGGCCGATCTGGCCATACACTTGAGTGACAATGACATCCACTTTGCCTTTCTCT  
AAGACGCGATTCTAACAGTCAAAGTTTTTGCTCCTCTAAACTATAAGTGGACCGGGCTAGACCGGTATGTGA ACTACTGTTACTGTAGGTGAAACGGAAAGAGA

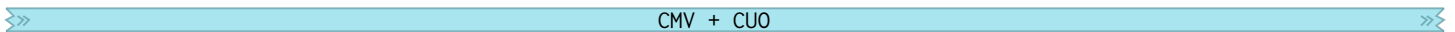

9,530 9,540 9,550 9,560 9,570 9,580 9,590 9,600 9,610 9,620 9,630

CCACAGGTGTCCACTCCAGGTCCAAGTTTGGTCTAGAGCTAGCGCCACCATGGGCGACAAGGCACGAGAGTGTTCAGAAGGCCTCTCCTAACGGCAAGCTGACC  
GGTGTCCACAGGTGAGGGTCCAGGTTCAAACCAGATCTCGATCGCGGTGGTACCCGCTGTTTCCGTGCTCTACAAGTCTTCCGAGAGGATTGCCGTTCCGACTGG

M G D K G T R V F K K A S P N G K L T

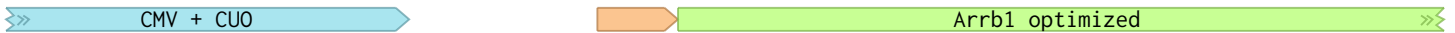

9,640 9,650 9,660 9,670 9,680 9,690 9,700 9,710 9,720 9,730

BspDI  
ClaI

GTGTACCTCGCAAGAGGGACTTCGTGGACCACATCGATCTGGTGGACCCTGTGGATGGCGTGGTCTGGTCGATCCCGAGTACCTGAAAGAACGGCGGGTGTACGT  
CACATGGAGCCGTTCTCCCTGAAGCACCTGGTGTAGCTAGACCACCTGGGACACCTACCGCACCACGACCAGCTAGGGCTCATGGACTTTCTTGCCGCCACATGCA

V Y L G K R D F V D H I D L V D P V D G V V L V D P E Y L K E R R V Y V

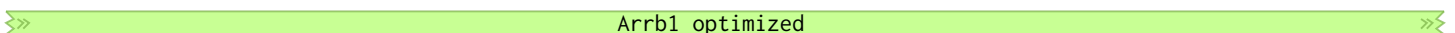

9,740 9,750 9,760 9,770 9,780 9,790 9,800 9,810 9,820 9,830 9,840

bArr1-HA-TEV219 pCDH-CuO-MCS-EF1 $\alpha$ -CymR-T2A-Bleo3 SparQ (10934 bp)

GACCTGACCTGCGCCTTTAGATACGGCCGCGAGGATCTGGATGTGCTGGCCTGACCTTCAGAAAGGACCTGTTCTGGCCAACGTGCAGAGCTTCCCACCAGCTC  
CTGGGACTGGACGCGAAATCTATGCCGGCGCTCCTAGACCTACACGACCCGGACTGGAAGTCTTTCCTGGACAAGCACCGGTTGCACGTCTCGAAGGGTGGTCGAG

T L T C A F R Y G R E D L D V L G L T F R K D L F V A N V Q S F P P A

» Arrb1 optimized »

9,850 9,860 9,870 9,880 9,890 9,900 9,910 9,920 9,930 9,940 9,950

CAGAGACAAGAAGCCCTGACCAGACTGCAAGAGCGGCTGATTAAGAAGCTGGGCGAGCAGCTTACCCTTCACCTTCGAGATCCCTCCAAACCTGCCTTGACGC  
GTCTCTGTCTTTCGGGACTGGTCTGACGTTCTCGCCGACTAATTCTTCGACCCGCTCGTGCGAATGGGAAGTGAAGCTCTAGGGAGGTTTGACGGAACGTCTG

P E D K K P L T R L Q E R L I K K L G E H A Y P F T F E I P P N L P C S

» Arrb1 optimized »

9,960 9,970 9,980 9,990 10,000 10,010 10,020 10,030 10,040 10,050

Bsu36I

GTGACTCCAACCTGGACCTGAGGATACCGAAAGGCCTGTGGCGTGGACTACGAAGTGAAGGCCTTTTGCGCCGAGAACCTGGAAGAGAAGATCCACAAGCGGAA  
CACTGTGAGGTTGGACCTGGACTCCTATGGCCTTCCGGACACCGCACCTGATGCTTCACTTCCGAAAACGCGGCTTGGACCTTCTTCTAGGTGTTCCGCTT

V T L Q P G P E D T G K A C G V D Y E V K A F C A E N L E E K I H K R N

» Arrb1 optimized »

10,060 10,070 10,080 10,090 10,100 10,110 10,120 10,130 10,140 10,150 10,160

CAGCGTGGGCTGGTCATCAGAAAGTGCAGTATGCCCTGAGAGGCCGACCTCAACCTACAGCCGAGACAACCAGACAGTTCTGATGAGCGACAAGCCCTGC  
GTCGACGCCGACAGTAGTCTTCCACGTCATACGGGACTCTCCGGCCTGGAGTTGGATGTGCGCTCTGTTGGTCTGTCAAGGACTACTCGTGTTCGGGGACG

S V R L V I R K V Q Y A P E R P G P Q P T A E T T R Q F L M S D K P L

» Arrb1 optimized »

10,170 10,180 10,190 10,200 10,210 10,220 10,230 10,240 10,250 10,260 10,270

ACCTGGAAGCCAGCCTGGACAAAGAGATCTACTACCAGCGGACCCATCAGCGTGAACGTCCACGTGACCAACAACACCAACAAGACCGTGAAGAAAATCAAGATC  
TGGACCTTCGGTCGGACCTGTTTCTCTAGATGATGGTGCCGCTCGGGTAGTCGCACTTGCAAGTGCAGGTGACTGGTTGTTGTGGTGTCTGGCACTTCTTTAGTTCTAG

H L E A S L D K E I Y Y H G E P I S V N V H V T N N T N K T V K K I K I

» Arrb1 optimized »

10,280 10,290 10,300 10,310 10,320 10,330 10,340 10,350 10,360 10,370

TCCGTGCGGCAGTACGCCGACATCTGCCTGTTTAAACACAGCCAGTACAAGTGCCCGTGGCCATGGAAGAGCCGATGATACAGTGGCCCTAGCAGCACCTTCTG  
AGGCACGCCGTCATGCGGCTGTAGACGGACAAAATGTGTGCGGTCATGTTACGGGGCACCGGTACCTTCTCCGGCTACTATGTCACGGGGATCGTCGTGGAAGAC

S V R Q Y A D I C L F N T A Q Y K C P V A M E E A D D T V A P S S T F C

» Arrb1 optimized »

10,390 10,400 10,410 10,420 10,430 10,440 10,450 10,460 10,470 10,480

bArr1-HA-TEV219 pCDH-CuO-MCS-EF1 $\alpha$ -CymR-T2A-Bleo3 SparQ (10934 bp)

BstZ17I

CAAAGTGTATACCCTGACACCTTCTGGCCAACAACCGCGAGAAGAGAGGACTGGCCCTGGACGGAAAGCTGAAGCACGAGGATACCAACCTGGCCAGCAGCACCC  
GTTTCACATATGGGACTGTGGAAAGGACCGGTTGTTGGCGCTTCTCTCCTGACCGGGACCTGCCTTTCGACTTCGTGCTCCTATGGTTGGACCGGTCGTCGTGGG

K V Y T L T P F L A N N R E K R G L A L D G K L K H E D T N L A S S T

Arrb1 optimized

10,490 10,500 10,510 10,520 10,530 10,540 10,550 10,560 10,570 10,580 10,590

TGCTTAGAGAGGGCGCAATAGAGAGATCCTGGGCATCATCGTGTCTACAAAGTGAAGTGAAGCTGGTGGTGTCCAGAGGGCGCCTGCTTGGAGATCTGGCCTCT  
ACGAATCTCTCCCGGTTATCTCTCTAGGACCCGTAGTAGCACAGGATGTTTCACTTTCCTTCCGACCACACAGGTCTCCGCCGGACGAACCTCTAGACCGGAGA

L L R E G A N R E I L G I I V S Y K V K V K L V V S R G G L L G D L A S

Arrb1 optimized

10,600 10,610 10,620 10,630 10,640 10,650 10,660 10,670 10,680 10,690 10,700

TCTGATGTGGCCGTGGAAGTGCCTTCCACTGATGCACCCCAAGCCTAAAGAGGAACCTCCTCACAGAGAGGTGCCCGAGAACGAGACACCCGTGGACACCAATCT  
AGACTACACCGGCACCTTGACGGGAAGTGTGACTACGTGGGTTTCGGATTTCTCCTTGGAGGAGTGTCTCTCCACGGGCTTGTCTGTGGGCACCTGTGGTTAGA

S D V A V E L P F T L M H P K P K E E P P H R E V P E N E T P V D T N L

Arrb1 optimized

10,710 10,720 10,730 10,740 10,750 10,760 10,770 10,780 10,790 10,800

GATCGAGCTGGACACAAACGACGACGACATCGTGTTCGAGGACTTCGCCCAGGAGACTGAAGGGCATGAAGGACGACAAAGAGGAAGAAGAGGACGGCACCAGGCT  
CTAGCTCGACCTGTGTTTGGCTGCTGTAGCACAAGCTCCTGAAGCGGGCCGTCTCTGACTTCCCGTACTTCTGCTGTTTCTCCTTCTCTCTGCGGTGGCCGA

I E L D T N D D D I V F E D F A R Q R L K G M K D D K E E E E D G T G

Arrb1 optimized

10,810 10,820 10,830 10,840 10,850 10,860 10,870 10,880 10,890 10,900 10,910

CTCCGAGCTCAATAATCGG

GAGGCGTCGAGTTATTAGCC

S P Q L N N R

Arrb1 optimized

10,920 10,930

(from 1-642 bp)

# bArr2-HA-TEV219 pCDH-CuO-MCS-EF1 $\alpha$ -CymR-T2A-Bleo...

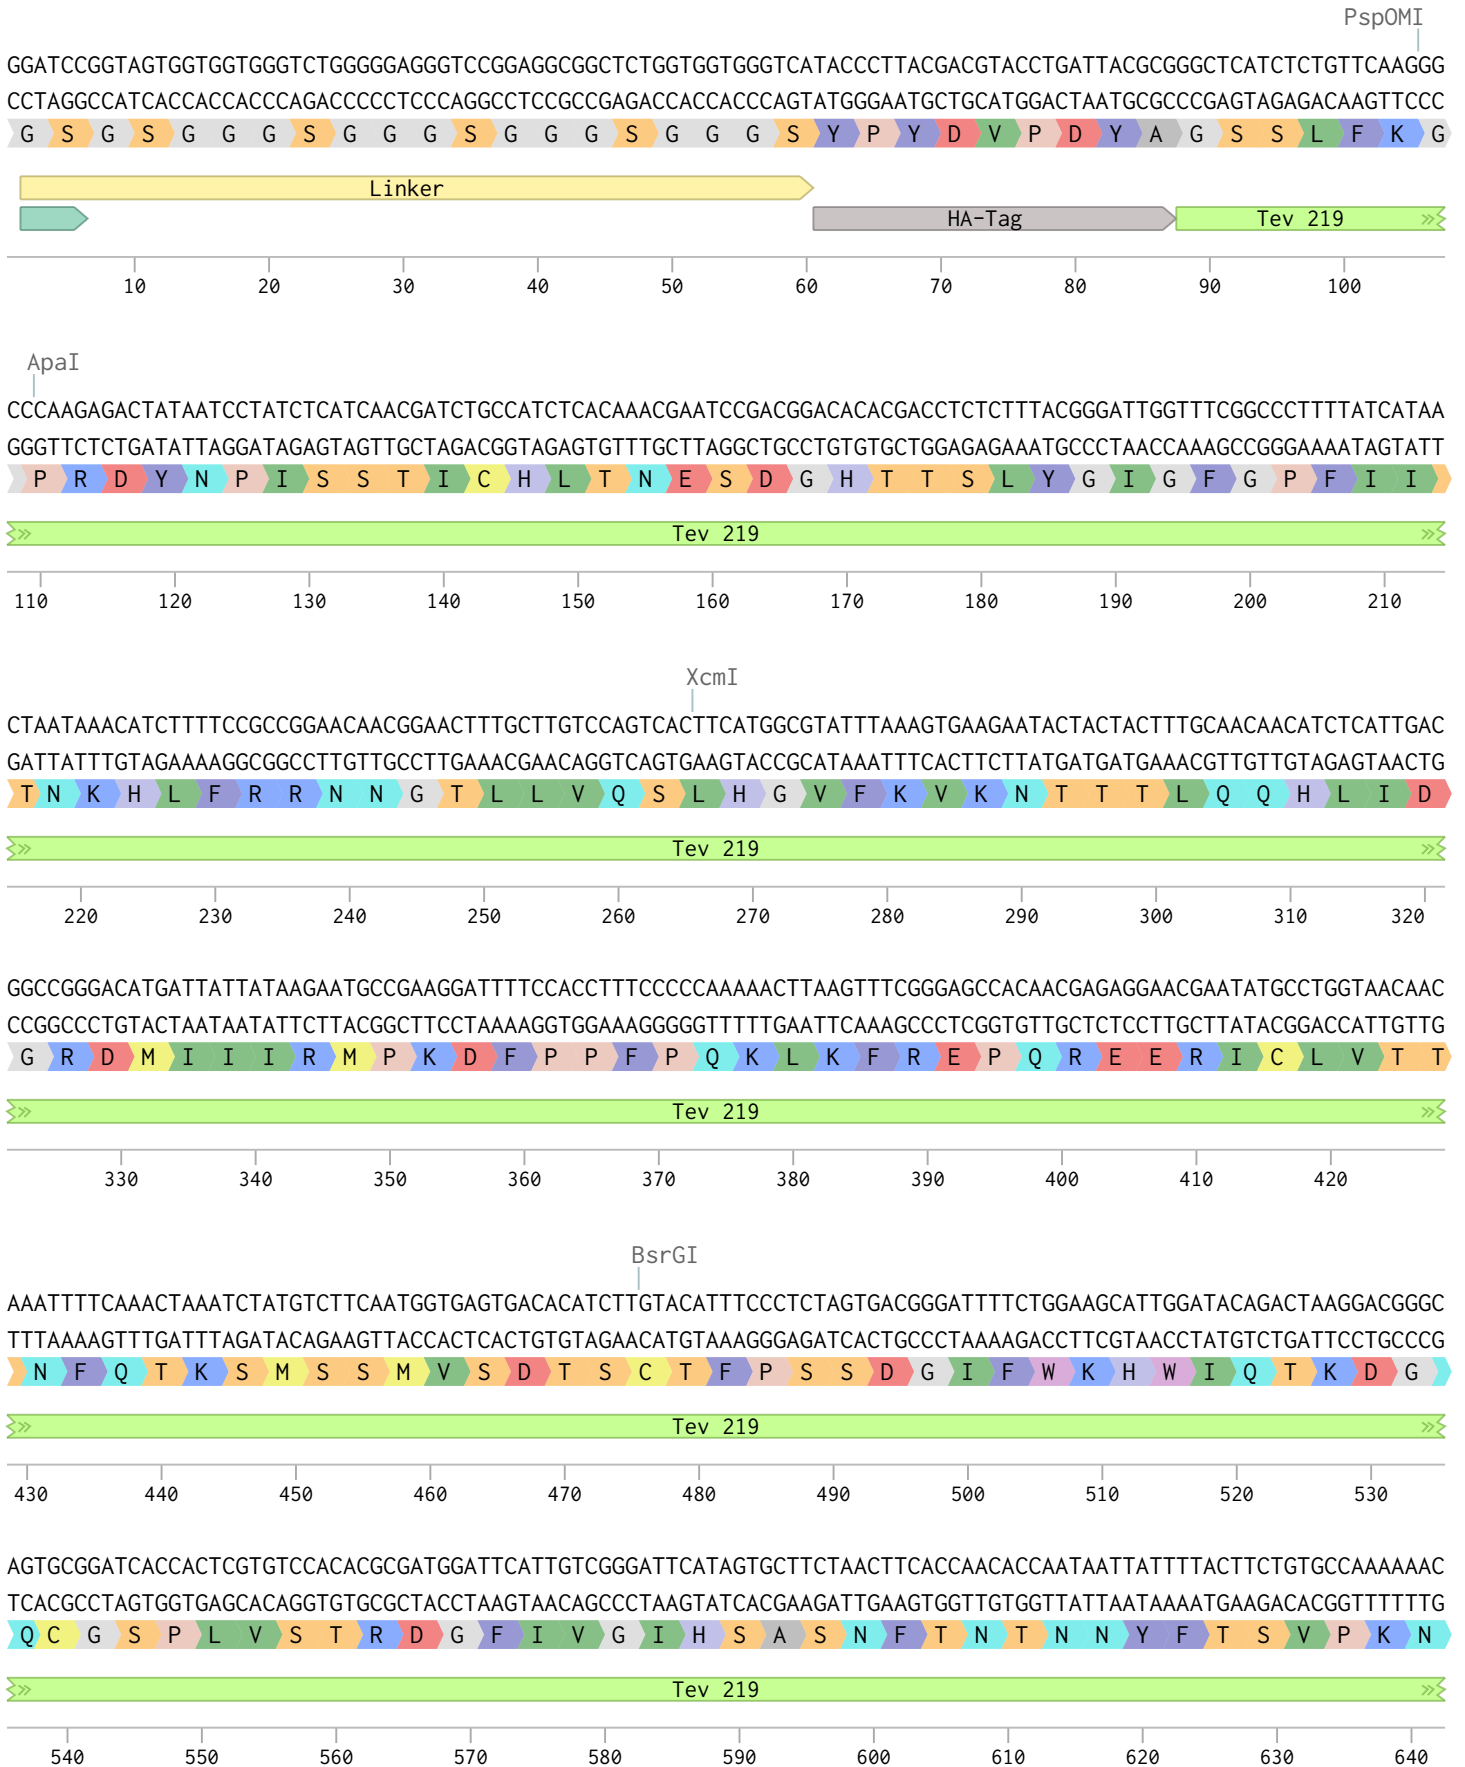

bArr2-HA-TEV219 pCDH-CuO-MCS-EF1 $\alpha$ -CymR-T2A-Bleo3 SparQ (10907 bp)

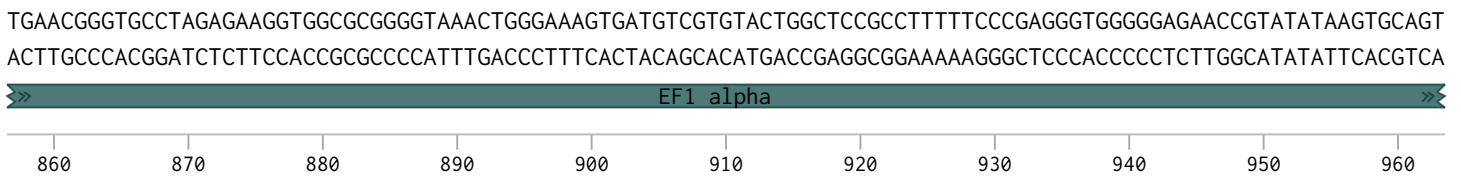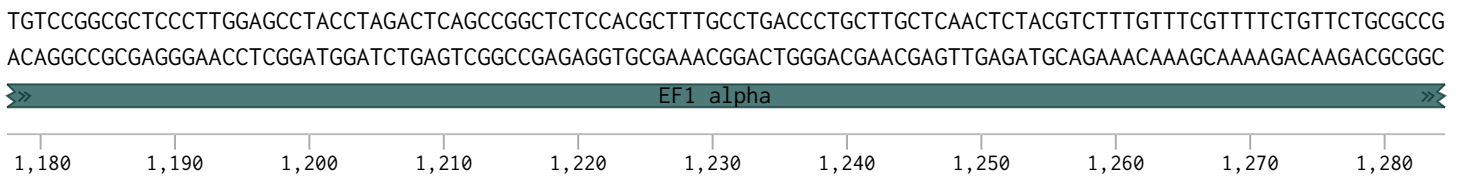

bArr2-HA-TEV219 pCDH-CuO-MCS-EF1 $\alpha$ -CymR-T2A-Bleo3 SparQ (10907 bp)

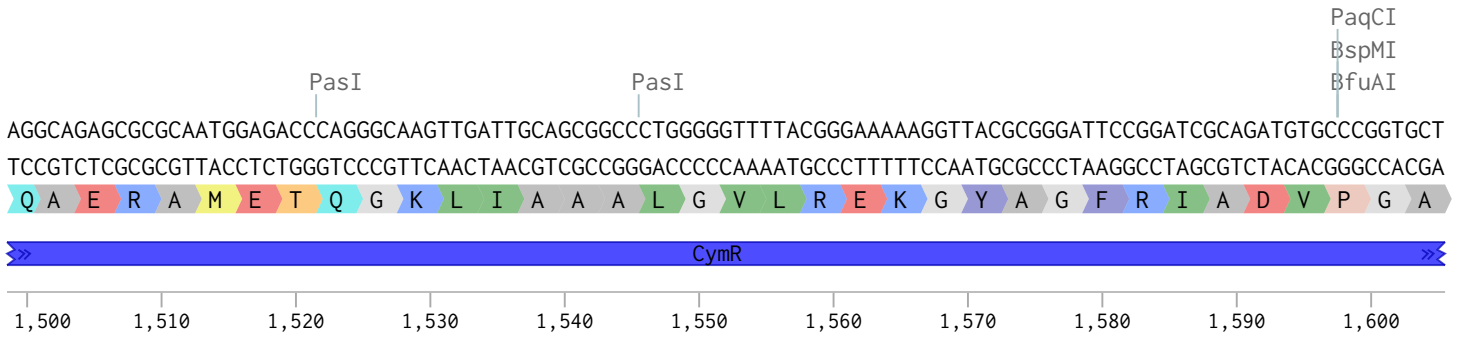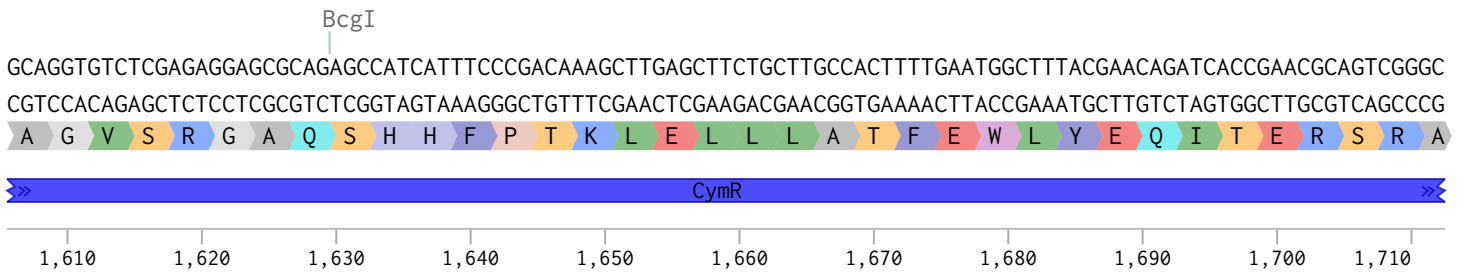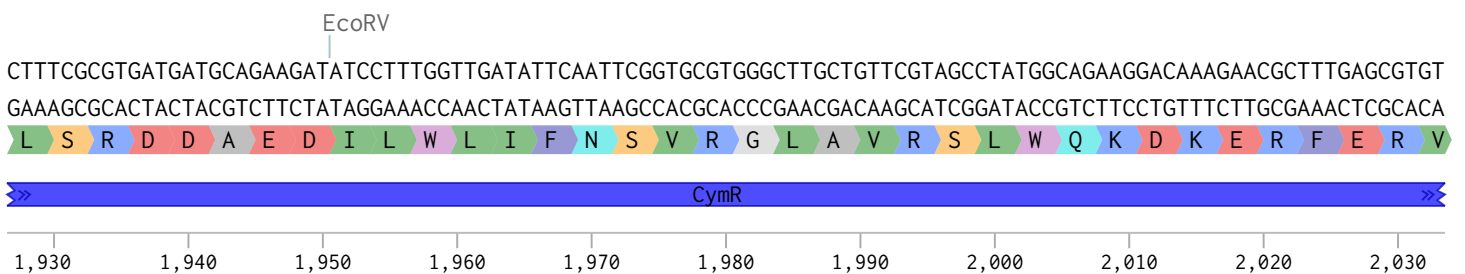



bArr2-HA-TEV219 pCDH-CuO-MCS-EF1 $\alpha$ -CymR-T2A-Bleo3 SparQ (10907 bp)

CAGGAACTCGACACTCGAAATTGCGCGAGAGCGGTACGCGAAATTC AAGCGCGCGCCAAACCCTCTGGCCGGTCTCTCTCTGTTTCGAGAGGGCAGAGGAAGTCTTC  
 GTCCTTGAGCTGTGAGCTTTAACGCGCTCTGCCATGCGCTTTAAGTTCGCGCGCCGTTGGGAGACCGGCCAGAGAGACAAGCTCTCCCGTCTCCTCAGAAG  
 R N S T L E I A R E R Y A K F K R A A K P S G

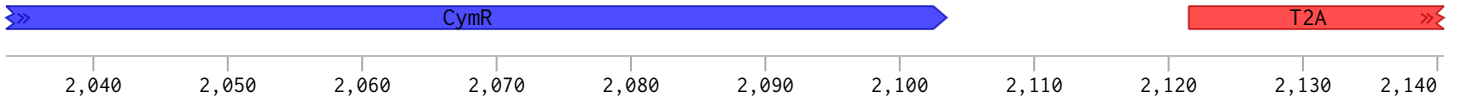

TAACATGCGGTGACGTGGAGGAGAATCCCGGCCCTGAATTCATGGCCAAGTTGACCAGTGCCGTTCCGGTGCTACCCGCGCGGACGTCGCCGGAGCGGTTCGAGTTC  
 ATTGTACGCCACTGCACCTCCTCTTAGGGCCGGGACTTAAGTACCGGTTCAACTGGTACAGGCAAGGCCACAGTGGCGCGGCTGCAGCGCCTCGCCAGCTCAAG  
 M A K L T S A V P V L T A R D V A G A V E F

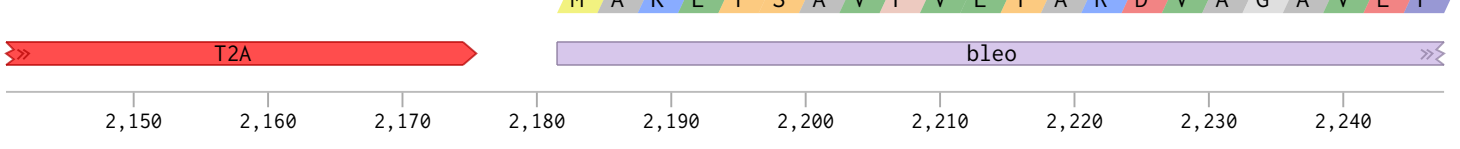

TGGACCGACCGGCTCGGGTCTCCCGGGACTTCGTGGAGGACGACTTCGCGCGGTGTGGTCCGGGACGACGTGACCCTGTTTCATCAGCGCGGTCCAGGACCAGGTGGT  
 ACCTGGCTGGCCGAGCCAAGAGGGCCCTGAAGCACCTCCTGCTGAAGCGGCCACACCAGGCCCTGCTGCACTGGGACAAGTAGTCGCGCCAGGTCCTGGTCCACCA  
 W T D R L G F S R D F V E D D F A G V V R D D V T L F I S A V Q D Q V V

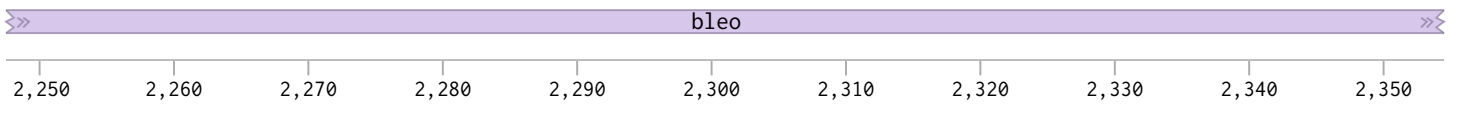

GCCGGACAACACCCTGGCTGGGTGTGGGTGCGCGGCTGGACGAGCTGTACGCCGAGTGGTCCGAGGTCGTGTCCACGAACCTCCGGGACGCCTCCGGGCCGGCCA  
 CGGCTGTTGTGGACCGGACCACACCCACGCGCCGACCTGCTCGACATGCGGCTCACCAGCCTCCAGCACAGGTGCTTGAAGGCCCTCGGAGGCCCGGCCGGT  
 P D N T L A W V W V R G L D E L Y A E W S E V V S T N F R D A S G P A

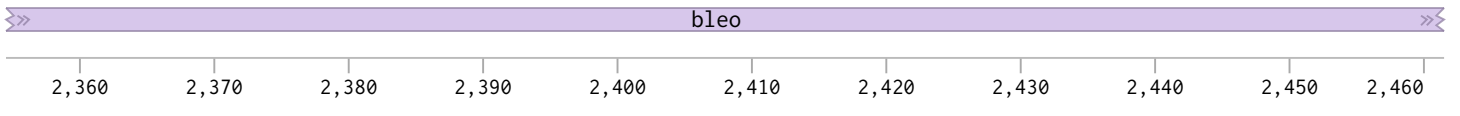

TGACCGAGATCGCGAGCAGCCGTGGGGCGGGAGTTCCGCTGCGCGACCCGCGGCAACTGCGTGCCTTCGTGGCCGAGGAGCAGGACTGAGTCGACTCGACA  
 ACTGGCTCTAGCCGCTCGTCGACCCCCGCCCTCAAGCGGACGCGCTGGGCCGGCGTTGACGCACGTGAAGCACCAGGCTCCTCGTCTGACTCAGCTGAGCTGT  
 M T E I G E Q P W G R E F A L R D P A G N C V H F V A E E Q D \*

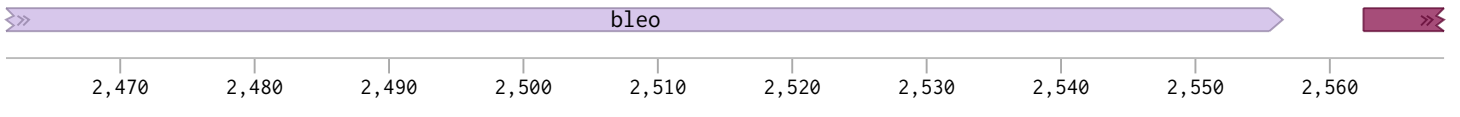

ATCAACCTCTGGATTACAAAATTTGTGAAAGATTGACTGGTATTCTTAACCTATGTTGCTCCTTTTACGCTATGTGGATACGCTGCTTTAATGCCTTTGTATCATGCT  
 TAGTTGGAGACCTAATGTTTTAAACACTTTCTAACTGACCATAAGAATTGATACAACGAGGAAAATGCGATACACCTATGCGACGAAATTCGAAACATAGTACGA  
 WPRE

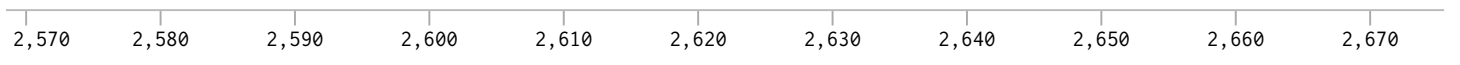

bArr2-HA-TEV219 pCDH-CuO-MCS-EF1 $\alpha$ -CymR-T2A-Bleo3 SparQ (10907 bp)

ATTGCTTCCCGTATGGCTTTTCATTTTCTCCTCCTTGATAAATCCTGGTTGCTGTCTCTTTATGAGGAGTTGTGGCCCGTTGTCAGGCAACGTGGCGTGGTGTGCAC  
TAACGAAGGGCATAACCGAAAGTAAAAGAGGAGGAACATATTTAGGACCAACGACAGAGAAATACTCCTCAACACCGGGCAACAGTCCGTTGCACCGCACCACACGTG

» WPRE »

2,680 2,690 2,700 2,710 2,720 2,730 2,740 2,750 2,760 2,770 2,780

TGTGTTTGTGACGCAACCCCACTGGTTGGGGCATTGCCACCACCTGTCAGCTCCTTTCCGGGACTTTTCGCTTTCCCCCTCCCTATTGCCACGGCGGAACTCATCG  
ACACAAACGACTGCGTTGGGGGTGACCAACCCCGTAACGGTGGTGGACAGTCGAGGAAAGGCCCTGAAAGCGAAAGGGGGAGGGATAACGGTGCCGCCTTGAGTAGC

» WPRE »

2,790 2,800 2,810 2,820 2,830 2,840 2,850 2,860 2,870 2,880

CCGCCTGCCTTGCCCGTCTGGACAGGGGCTCGGCTGTTGGGCACTGACAATCCGTGGTGTGTCGGGAAATCATCGTCTTTCTTGCTGCTCGCCTGTGTT  
GGCGGACGGAACGGGCGACGACCTGTCCCGAGCCGACAACCCGTGACTGTTAAGGCACCACAACAGCCCTTTAGTAGCAGGAAAGGAACCGACGAGCGGACACAA

» WPRE »

2,890 2,900 2,910 2,920 2,930 2,940 2,950 2,960 2,970 2,980 2,990

GCCACCTGGATTCTGCGCGGGACGTCCTTCTGCTACGTCCCTTCGGCCCTCAATCCAGCGGACCTTCTTCCCGCGGCTGCTGCCGGCTCTGCGGCCTTCCGGC  
CGGTGGACCTAAGACGCGCCCTGCAGGAAGACGATGCAGGGAAGCCGGGAGTTAGGTCGCTGGAAGGAAGGGCGCCGACGACGGCCGAGACCGCGAGAAGGGCC

» WPRE »

3,000 3,010 3,020 3,030 3,040 3,050 3,060 3,070 3,080 3,090 3,100

TCTTCGCTTCGCCCTCAGACGAGTCGGATCTCCCTTTGGCCGCCTCCCGCCTGGTACCTTTAAGACCAATGACTTACAAGGCAGCTGTAGATCTTAGCCACTTT  
AGAAGCGGAAGCGGGAGTCTGCTCAGCCTAGAGGGAAACCCGGCGGAGGGGCGGACCATTGAAATTTCTGTTACTGAATGTTCCGTCGACATCTAGAATCGGTGAAA

» WPRE »

KpnI  
Acc65I

3,110 3,120 3,130 3,140 3,150 3,160 3,170 3,180 3,190 3,200 3,210

TTAAAAGAAAAGGGGGGACTGGAAGGGCTAATCACTCCCAACGAAGATAAGATCTGCTTTTTGCTTGTACTGGTCTCTGTTAGACCAGATCTGAGCCTGGGA  
AATTTTCTTTCCCCCTGACCTTCCCGATTAAGTGAGGGTTGCTTCTATTCTAGACGAAAAACGAACATGACCCAGAGAGACCAATCTGGTCTAGACTCGGACCCT

3'LTR »

3,220 3,230 3,240 3,250 3,260 3,270 3,280 3,290 3,300 3,310

GCTCTGGCTAACTAGGGAACCCACTGCTTAAGCCTCAATAAAGCTTGCCTTGAGTGCTTCAAGTAGTGTGTGCCCGTCTGTTGTGTGACTCTGGTAACTAGAGAT  
CGAGAGACCGATTGATCCCTTGGGTGACGAATTCGGAGTTATTTGAAACGGAACCTCACGAAGTTCATCACACACGGGACAGACAACACTGAGACCATTGATCTCTA

» 3'LTR »

3,320 3,330 3,340 3,350 3,360 3,370 3,380 3,390 3,400 3,410 3,420

CCCTCAGACCCTTTTAGTCAGTGTGAAAAATCTCTAGCAGTAGTAGTTCATGTCATCTTATTATTAGTATTTATAACTTGCAAAGAAATGAATATCAGAGAGTGAG  
GGGAGTCTGGAAAAATCAGTCACACCTTTAGAGATCGTCATCATCAAGTACAGTAGAATAATAAGTCATAAATATTGAACGTTTCTTTACTTATAGTCTCTCACTC

» 3'LTR »

3,430 3,440 3,450 3,460 3,470 3,480 3,490 3,500 3,510 3,520 3,530

bArr2-HA-TEV219 pCDH-CuO-MCS-EF1 $\alpha$ -CymR-T2A-Bleo3 SparQ (10907 bp)

AGGAACTTGTATTATGCAGCTTATAATGGTTACAATAAAGCAATAGCATCACAAATTCACAAATAAAGCATTTTTTCACTGCATTCTAGTTGTGGTTTGTCCAA  
TCCTTGAACAAATAACGTCGAATATTACCAATGTTTATTTTCGTTATCGTAGTGTTTAAAGTGTATTTTCGTAATAAAGTACGTAAGATCAACACCAAACAGTT

SV40 Polyadenylation signal

3,540 3,550 3,560 3,570 3,580 3,590 3,600 3,610 3,620 3,630

ACTCATCAATGTATCTTATCATGTCTGGCTCTAGCTATCCCGCCCCTAACTCCGCCATCCCGCCCCTAACTCCGCCAGTTCCGCCATTCTCCGCCCATGGCTG  
TGAGTAGTTACATAGAATAGTACAGACCGAGATCGATAGGGCGGGGATTGAGGCGGGTAGGGCGGGATTGAGGCGGGTCAAGGCGGGTAAAGGCGGGTACCGAC

SV40 Polyad...ion signal

SV40 Ori

3,640 3,650 3,660 3,670 3,680 3,690 3,700 3,710 3,720 3,730 3,740

SfiI

ACTAATTTTTTTTATTTATGCAGAGGCCGAGGCCCTCGGCTCTGAGCTATTCCAGAAGTAGTGAGGAGCTTTTTGGAGGCTAGACTTTTGCAGAGACCAA  
TGATTAATAAATAAATACGCTCCGGCTCCGGCGGAGCCGAGACTCGATAAGGTCTTCATCACTCTCCGAAAAAACCCTCCGATCTGAAAACGTCTCTGGTTT

SV40 Ori

3,750 3,760 3,770 3,780 3,790 3,800 3,810 3,820 3,830 3,840 3,850

TTCGTAATCATGTCATAGCTGTTTCTGTGTGAAATTGTTATCCGCTCACAAATCCACACAACATACGAGCCGGAAGCATAAAGTGTAAGCCTGGGGTGCCTAATG  
AAGCATTAGTACAGTATCGACAAAGGACACACTTAAACAATAGGCGAGTGTTAAGGTGTGTTGTATGCTCGGCTTCGTATTTACATTTTCGACCCACGGATTAC

3,860 3,870 3,880 3,890 3,900 3,910 3,920 3,930 3,940 3,950

AGTGAGCTAACTCACATTAATTGCGTTGCGCTCACTGCCGCTTCCAGTCGGGAAACCTGTCGTGCCAGCTGCATTAATGAATCGCCAACGCGGGGAGAGGGC  
TCACTCGATTGAGTGAATTAACGCAACGCGAGTGACGGGCGAAAGGTGAGCCCTTTGGACAGCACGGTTCGACGTAATTAAGTTCGCGTTCGCGCCCTCTCCGC

3,960 3,970 3,980 3,990 4,000 4,010 4,020 4,030 4,040 4,050 4,060

BspQI

SapI

GTTTTCGATTGGGGCTCTCCGCTTCTCGCTCACTGACTCGCTGCGCTCGGTCGTTTCGGCTGCGGCGAGCGGTATCAGTCACTCAAAGGCGGTAATACGGTTA  
CAAACGCATAAACCCGCGAGAAGGCGAAGGAGCGAGTGACTGAGCGACGCGAGCCAGCAAGCCGACCGCTCGCCATAGTTCGAGTGAGTTTCCGCCATTATGCCAAT

4,070 4,080 4,090 4,100 4,110 4,120 4,130 4,140 4,150 4,160 4,170

AflIII

PciI

TCCACAGAATCAGGGATAACGCAGGAAAGAATGTGAGCAAAAGCCAGCAAAAGCCAGGAACCGTAAAAAGGCCGCTTGGTGGCGTTTTTCCATAGGCTCCG  
AGGTGCTTAGTCCCTATTGCGTCTTTCTGTACTCGTTTTCCGGTCTTTCCGGTCTTTGGCATTTCGCGCAACGACCCGAAAAAGGTATCCGAGGC

pUC ori

4,180 4,190 4,200 4,210 4,220 4,230 4,240 4,250 4,260 4,270 4,280

CCCCCTGACGAGCATCACAAAATCGACGCTCAAGTCAGAGGTGGCGAAACCCGACAGGACTATAAAGATACCAGGCGTTTCCCCTGGAAGCTCCCTCGTGCCT  
GGGGGACTGCTCGTAGTGTTTTAGCTGCGAGTTCAGTCTCCACCGCTTTGGCTGTCTGATATTTCTATGGTCCGCAAGGGGACCTTCGAGGGAGCACGCGA

pUC ori

4,290 4,300 4,310 4,320 4,330 4,340 4,350 4,360 4,370 4,380

bArr2-HA-TEV219 pCDH-CuO-MCS-EF1 $\alpha$ -CymR-T2A-Bleo3 SparQ (10907 bp)

CTCCTGTTCCGACCCTGCCGCTTACCGGATACCTGTCCGCCTTTCTCCCTTCGGAAGCGTGGCGCTTTCTCATAGCTCAGCTGTAGGTATCTCAGTTCGGTGTAG  
GAGGACAAGGCTGGGACGGCGAATGGCCTATGGACAGGCGGAAAGAGGGAAGCCCTTCGACCAGCGAAAGAGTATCGAGTGCAGATCCATAGAGTCAAGCCACATC



GTCGTTTCGCTCCAAGCTGGGCTGTGTGCACGAACCCCCGTTACGCCGACCCTGCGCCTTATCCGGTAACTATCGTCTTGAGTCCAACCCGGTAAGACACGACTT  
CAGCAAGCGAGGTTCCGACCCGACACACGTGCTTGGGGGCAAGTCGGGCTGGCGACGCGGAATAGGCCATTGATAGCAGAACTCAGTTGGCCATTCTGTGCTGAA



ATCGCCACTGGCAGCAGCCACTGGTAACAGGATTAGCAGAGCGAGGTATGTAGCGGTGCTACAGAGTCTTGAAGTGGTGGCCTAACTACGGCTACACTAGAAGGA  
TAGCGGTGACCGTTCGTCGGTGACCATTGTCCTAATCGTCTCGCTCCATACATCCGCCACGATGTCTCAAGAACTTACCACCCGATTGATGCCGATGTGATCTTCTC

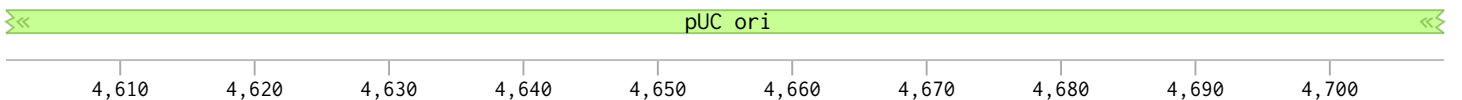

CAGTATTTGGTATCTGCGCTCTGCTGAAGCCAGTTACCTTCGAAAAAGAGTTGGTAGCTCTTGATCCGGCAAACAACCACCGCTGGTAGCGGTGGTTTTTTTGGT  
GTCATAAACCATAGACGCGAGACGACTTCGGTCAATGGAAGCCTTTTTCTCAACCATCGAGAACTAGGCCGTTTGGTTGGTGGCGACCATCGCCACCAAAAAAACAA



TGCAAGCAGCAGATTACGCGCAGAAAAAAGGATCTCAAGAAGATCCTTTGATCTTTTCTACGGGTCTGACGCTCAGTGAACGAAAACCTCACGTTAAGGGATTTT  
ACGTTTCGTCGCTAATGCGCGTCTTTTTTCTAGAGTTCTTCTAGGAACTAGAAAAGATGCCCCAGACTGCGAGTACCTTGTCTTTGAGTGAATTCCTAAAA



GGTCATGAGATTATCAAAAAGGATCTTACCTAGATCCTTTAAATTAATAAATGAAGTTTTAAATCAATCTAAAGTATATATGAGTAACTTGGTCTGACAGTTACC  
CCAGTACTCTAATAGTTTTTCTAGAAGTGGATCTAGGAAAATTAATTTTTACTTCAAATTTAGTTAGATTTTCATATATACTCATTTGAACCAGACTGTCAATGG



AATGCTTAATCAGTGAGGCACCTATCTCAGCGATCTGTCTATTTTCGTTTCATCCATAGTTGCCTGACTCCCCGTCGTGTAGATAACTACGATACGGGAGGGCTTACCA  
TTACGAATTAGTCACTCCGTGGATAGAGTCGCTAGACAGATAAAGCAAGTAGGTATCAACGGACTGAGGGGCAGCACATCTATTGATGCTATGCCCTCCCGAATGGT



TCTGGCCCCAGTGCTGCAATGATACCGCGAGACCCACGCTCACCGGCTCCAGATTTATCAGCAATAAACCAGCCAGCCGGAAGGGCCGAGCGCAGAAGTGGTCTTGC  
AGACCGGGGTACGACGTTACTATGGCGCTCTGGGTGCGAGTGGCCGAGGTCTAAATAGTCGTTATTTGGTTCGGTTCGGCCTTCCCGGCTCGCGTCTTACCAGGACG



bArr2-HA-TEV219 pCDH-CuO-MCS-EF1 $\alpha$ -CymR-T2A-Bleo3 SparQ (10907 bp)

AACTTTATCCGCCTCCATCCAGTCTATTAATTGTTGCCGGGAAGCTAGAGTAAGTAGTTCGCCAGTTAATAGTTTGCACAACGTTGTTGCCATTGCTACAGGCATCG  
TTGAAATAGGCGGAGGTAGGTCAGATAATTAACAACGGCCCTTCGATCTCATTCAAGCGGTCAATTATCAAACGCGTTGCAACAACGGTAACGATGTCCTGTAGC  
FspI  
AmpR  
5,250 5,260 5,270 5,280 5,290 5,300 5,310 5,320 5,330 5,340 5,350

TGGTGTACGCTCGTCGTTTGGTATGGCTTCATTAGCTCCGGTCCCAACGATCAAGGCGAGTTACATGATCCCCATGTTGTGCAAAAAAGCGGTTAGCTCCTTC  
ACCACAGTGCAGCAGCAAACCATAACGAAGTAAGTCGAGGCCAAGGTTGCTAGTTCGGCTCAATGACTAGGGGGTACAACACGTTTTTTCGCCAATCGAGGAAG  
AmpR  
5,360 5,370 5,380 5,390 5,400 5,410 5,420 5,430 5,440 5,450

GGTCTCCGATCGTTGTCAGAAGTAAGTTGGCCGAGTGTATCACTCATGGTTATGGCAGCACTGCATAATTCTTACTGTCATGCCATCCGTAAGATGCTTTTC  
CCAGGAGGTAGCAACAGTCTTCACTCAACCGCGTCACAATAGTGAGTACCAATACCGTCGTGACGTATTAAGAGAATGACAGTACGGTAGGCATTCTACGAAAAG  
AmpR  
5,460 5,470 5,480 5,490 5,500 5,510 5,520 5,530 5,540 5,550 5,560

TGTGACTGGTGAGTACTCAACCAAGTCATTCTGAGAATAGTGTATGCGGCGACCGAGTTGCTCTTGCCCGCGTCAATACGGGATAATACCGCGCCACATAGCAGAA  
ACACTGACCACTCATGAGTTGGTTTCAGTAAGACTCTTATCACATACGCCGTGGCTCAACGAGAACGGGCGCGAGTTATGCCCTATTATGGCGCGGTGATCGTCTT  
BcgI  
AmpR  
5,570 5,580 5,590 5,600 5,610 5,620 5,630 5,640 5,650 5,660 5,670

CTTTAAAAGTGCTCATCATTGGAAAACGTTCTTCGGGGCGAAAACCTCAAGGATCTTACCGCTGTTGAGATCCAGTTCGATGTAACCCACTCGTGACCCAACTGA  
GAAATTTTACAGGAGTAGTAACCTTTTGAAGAAGCCCCGCTTTTGGAGATTCTAGAATGGCGACAACCTCTAGGTCAAGCTACATTGGGTGAGCACGTGGGTTGACT  
XmnI  
AmpR  
5,680 5,690 5,700 5,710 5,720 5,730 5,740 5,750 5,760 5,770

TCTTCAGCATCTTTTACTTTACCAGCGTTTCTGGGTGAGCAAAAACAGGAAGGCAAAAATGCCGCAAAAAGGGAATAAGGGCGACACGGAAATGTTGAATACTCAT  
AGAAGTCGTAGAAAATGAAAGTGGTCGAAAGACCCACTCGTTTTTGTCTCCGTTTTACGGCGTTTTTCCCTTATTCCCGCTGTGCCTTTACAACCTATGAGTA  
AmpR  
5,780 5,790 5,800 5,810 5,820 5,830 5,840 5,850 5,860 5,870 5,880

ACTCTTCCTTTTTCAATATTATTGAAGCATTATCAGGGTATTGTCTCATGAGCGGATACATATTTGAATGTATTTAGAAAAATAAACAAATAGGGGTTCCGCGCA  
TGAGAAGGAAAAAGTTATAATAACTTCGTAATAGTCCCAATAACAGAGTACTCGCTATGTATAAACTTACATAAATCTTTTTATTTGTTTATCCCAAGGCGCGT  
SspI  
5,890 5,900 5,910 5,920 5,930 5,940 5,950 5,960 5,970 5,980 5,990

CATTTCCCGAAAAGTGCCACCTGACGTCTAAGAAACCATTATTATCATGACATTAACCTATAAAAATAGGCGTATCACGAGGCCCTTTGCTCTCGCGGTTTCGGT  
GTAAGGGGCTTTTTCACGGTGGACTGCAGATTCTTTGGTAATAATAGTACTGTAATTGGATTTTTATCCGCATAGTCTCCGGGAAAGCAGAGCGCGCAAAGCCA  
6,000 6,010 6,020 6,030 6,040 6,050 6,060 6,070 6,080 6,090

bArr2-HA-TEV219 pCDH-CuO-MCS-EF1 $\alpha$ -CymR-T2A-Bleo3 SparQ (10907 bp)

GATGACGGTAAAACTCTGACACATGCAGCTCCCGGAGACGGTCACAGCTTGTCTGTAAAGCGGATGCCGGGAGCAGACAAGCCCGTCAGGGCGCGTCAGCGGGTGT  
CTACTGCCACTTTTGGAGACTGTGTACGTCGAGGGCCTCTGCCAGTGTGCAACAGACATTGCGCTACGGCCCTCGTCTGTTCCGGCAGTCCCGCGCAGTCGCCACA

6,100 6,110 6,120 6,130 6,140 6,150 6,160 6,170 6,180 6,190 6,200

BstAPI  
NdeI

TGGCGGGTGTCCGGGCTGGCTTAACTATGCGGCATCAGAGCAGATTGTAAGAGAGTGCACCATATGCGGGTGTGAAATACCGCACAGATGCGTAAGGAGAAAATACC  
ACGCCCCACAGCCCCGACCGAATTGATACGCCGTAGTCTCGTCTAACATGACTCTCACGTGGTATACGCCACACTTTATGGCGTGTCTACGCATTCTCTTTTATGG

6,210 6,220 6,230 6,240 6,250 6,260 6,270 6,280 6,290 6,300 6,310

FspI

GCATCAGGCGCCATTGCCATTAGGCTGCGCAACTGTTGGAAAGGGCGATCGGTGCGGGCCTCTTCGCTATTACGCCAGCTGGCGAAAGGGGGATGTGCTGCAAGG  
CGTAGTCCGCGGTAAGCGGTAAGTCCGACGCGTTGACAACCTTCCCGCTAGCCACGCCCCGAGAAGCGATAATGCGGTGACCGCTTTCCCCCTACACGACGTTCC

6,320 6,330 6,340 6,350 6,360 6,370 6,380 6,390 6,400 6,410 6,420

AflIII  
MluI

CGATTAAGTTGGTAACGCCAGGGTTTTCCAGTACGACGTTGTAAAACGACGGCCAGTGCCAAGCTGACGCGTGTAGTCTTATGCAATACTCTTGTAGTCTTGCA  
GCTAATCAACCCATTGCGGTCCAAAAGGGTCAGTGTGCAACATTTTGTGCGCGTACGGTTCGACTGCGCACATCAGAATACGTTATGAGAACATCAGAACGT

RSV

6,430 6,440 6,450 6,460 6,470 6,480 6,490 6,500 6,510 6,520

SphI BaeI

ACATGGTAACGATGAGTTAGCAACATGCCTTACAAGGAGAGAAAAAGCACCGTGCATGCCGATTGGTGGAAAGTAAGGTGGTACGATCGTGCCTTATTAGGAAGGCAA  
TGTACCATTGCTACTCAATCGTTGTACGGAATGTTCTCTCTTTTTCGTGGCAGTACGGCTAACACCTTCAATCCACCATGCTAGCACGGAATAATCCTCCGTT

RSV

6,530 6,540 6,550 6,560 6,570 6,580 6,590 6,600 6,610 6,620 6,630

CAGACGGTCTGACATGGATTGGACGAACCACTGAATTGCCGATTGCAGAGATATTGTATTTAAGTGCCTAGCTCGATACATAAACGGGTCTCTCTGGTTAGACCA  
GTCTGCCAGACTGTACCTAACCTGCTTGGTGACTTAACGGCGTAACGTCTCTATAACATAAATTCACGGATCGAGCTATGATTTGCCAGAGAGACCAATCTGGT

RSV HIV LTR

6,640 6,650 6,660 6,670 6,680 6,690 6,700 6,710 6,720 6,730 6,740

GATCTGAGCCTGGGAGCTCTCTGGCTAACTAGGGAACCACTGCTTAAAGCCTCAATAAGCTTGCCTTGAGTGTCAAGTAGTGTGTGCCGTCTGTTGTGTGACT  
CTAGACTCGGACCCTCGAGAGACCGATTGATCCCTTGGGTGACGAATTCGGAGTTATTTGAAACGGAACCTACGAAGTTCATCACACAGGGCAGACAACACACTGA

HIV LTR

6,750 6,760 6,770 6,780 6,790 6,800 6,810 6,820 6,830 6,840

CTGGTAACTAGAGATCCCTCAGACCCTTTTAGTCAGTGTGGAAAATCTCTAGCAGTGGCGCCGAACAGGGACTTAAAGCGAAAGGAAACCAGAGGAGCTCTCTC  
GACCATTGATCTCTAGGGAGTCTGGGAAAATCAGTCACACCTTTTAGAGATCGTCACCGGGCTTGTCCCTGAACTTTGCTTTCCCTTTGGTCTCTCGAGAGAG

HIV LTR

6,850 6,860 6,870 6,880 6,890 6,900 6,910 6,920 6,930 6,940 6,950

bArr2-HA-TEV219 pCDH-CuO-MCS-EF1 $\alpha$ -CymR-T2A-Bleo3 SparQ (10907 bp)

GAGCAGGACTCGGCTTGTGAAGCGCGCACGGCAAGAGGGCGGGGGCGGCGACTGGTGTAGTACGCCAAAAATTTTGACTAGCGGAGGCTAGAAGGAGAGAGATGGG  
CTGCGTCTGAGCCGAACGACTTCGCGCGTGCCGTTCTCCGCTCCCCGCCGCTGACCACTCATGCGGTTTTTAAACTGATCGCTCCGATCTTCTCTCTCTACCC



TGGGAGAGCGTCAAGTATTAAGCGGGGAGAATTAGATCGCGATGGGAAAAAATTCGGTTAAGCCAGGGGAAAGAAAAATATAAATTAACATATAGTATGGGC  
ACGCTCTCGCAGTCATAATTCGCCCTCTTAATCTAGCGCTACCCTTTTTAAGCCAATTCGGTCCCCCTTCTTTTTATATTTAATTTGTATATCATAACCCG

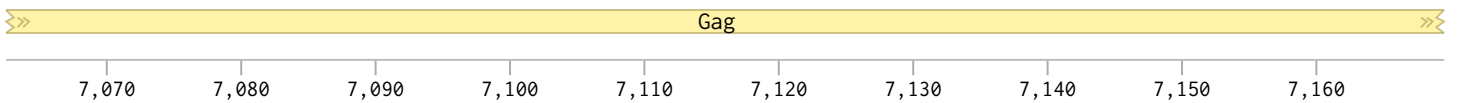

AAGCAGGGAGCTAGAACGATTCGCAGTTAATCCTGGCCTGTAGAAACATCAGAAGGCTGTAGACAAATACTGGGACAGCTACAACCATCCCTTCAGACAGGATCAG  
TTCGTCCTCGATCTTGCTAAGCGTCAATTAGGACCGGACAATCTTTGTAGTCTCCGACATCTGTTATGACCCTGTGATGTTGGTAGGGAAGTCTGCTCTAGTC

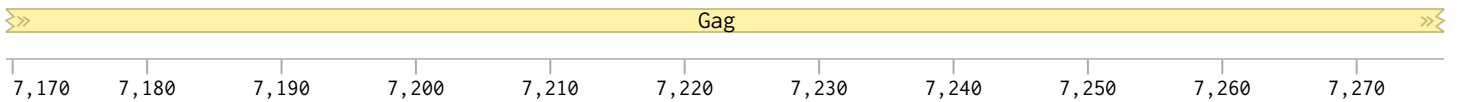

AAGAACTTAGATCATTATATAATACAGTAGCAACCTCTATTGTGTGCATCAAGGATAGAGATAAAGACACCAAGGAAGCTTTAGACAAGATAGAGGAAGAGCAA  
TTCTTGAATCTAGTAATATATTATGTCATCGTTGGGAGATAACACACGTAGTTTCTATCTATTTCTGTGGTCCCTCGAAATCTGTTCTATCTCTCTCTCGTT

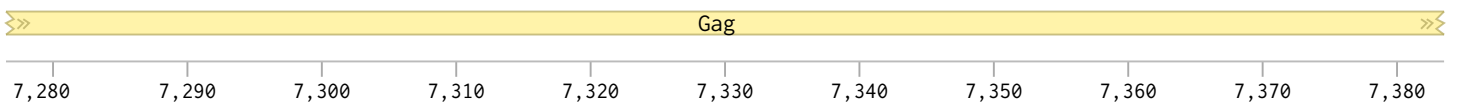

AACAAAAGTAAGACCACCGCACAGCAAGCGGCCACTGATCTTCAGACCTGGAGGAGGAGATATGAGGGACAATTGGAGAAGTGAATTATATAAATATAAAGTAGTAA  
TTGTTTTTCTTCTGGTGGCGTGTGTTCCCGGTGACTAGAAGTCTGGACCTCCTCTATACTCCCTGTTAACCTCTTCACTTAATATATTTATATTTTCATCATT

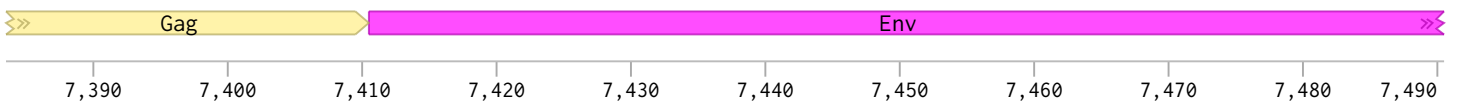

AAATTGAACCATTAGGAGTAGCACCCACCAAGGCAAAGAGAAGAGTGGTGCAGAGAGAAAAAGAGCAGTGGGAATAGGAGCTTTGTTCTTGGGTTCTTGGGAGCA  
TTTAACTTGGTAATCCTCATCGTGGTGGTCCGTTTCTTCTTCTACCACGTCTCTTTTTTCTCGTCACCTTATCCTCGAAACAAGGAACCAAGAACCCTCGT

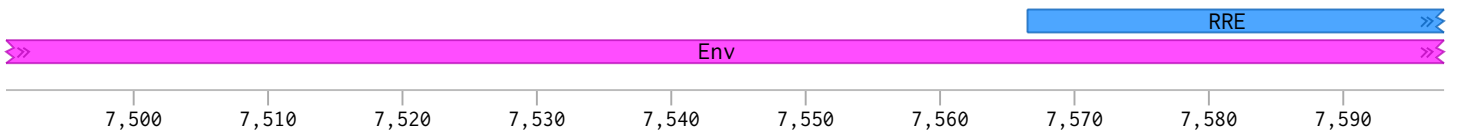

GCAGGAAGCACTATGGGCGCAGCGTCAATGACGCTGACGGTACAGGCCAGACAATTATTGTCTGGTATAGTGCAGCAGCAGAACAATTTGCTGAGGGCTATTGAGGC  
CGTCTTCTGATACCCGCGTGCAGTACTGCGACTGCCATGTCCGGTCTGTTAATAACAGACCATATCACGTCGTCGTTGTTAAACGACTCCCGATAACTCCG

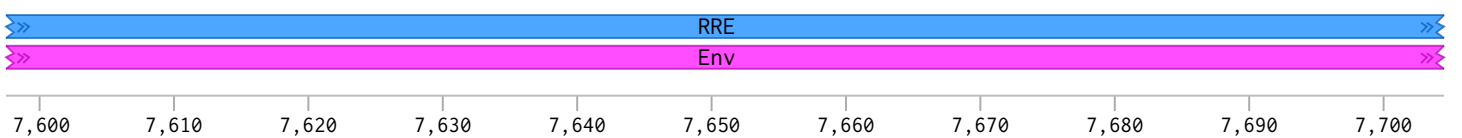

bArr2-HA-TEV219 pCDH-CuO-MCS-EF1 $\alpha$ -CymR-T2A-Bleo3 SparQ (10907 bp)

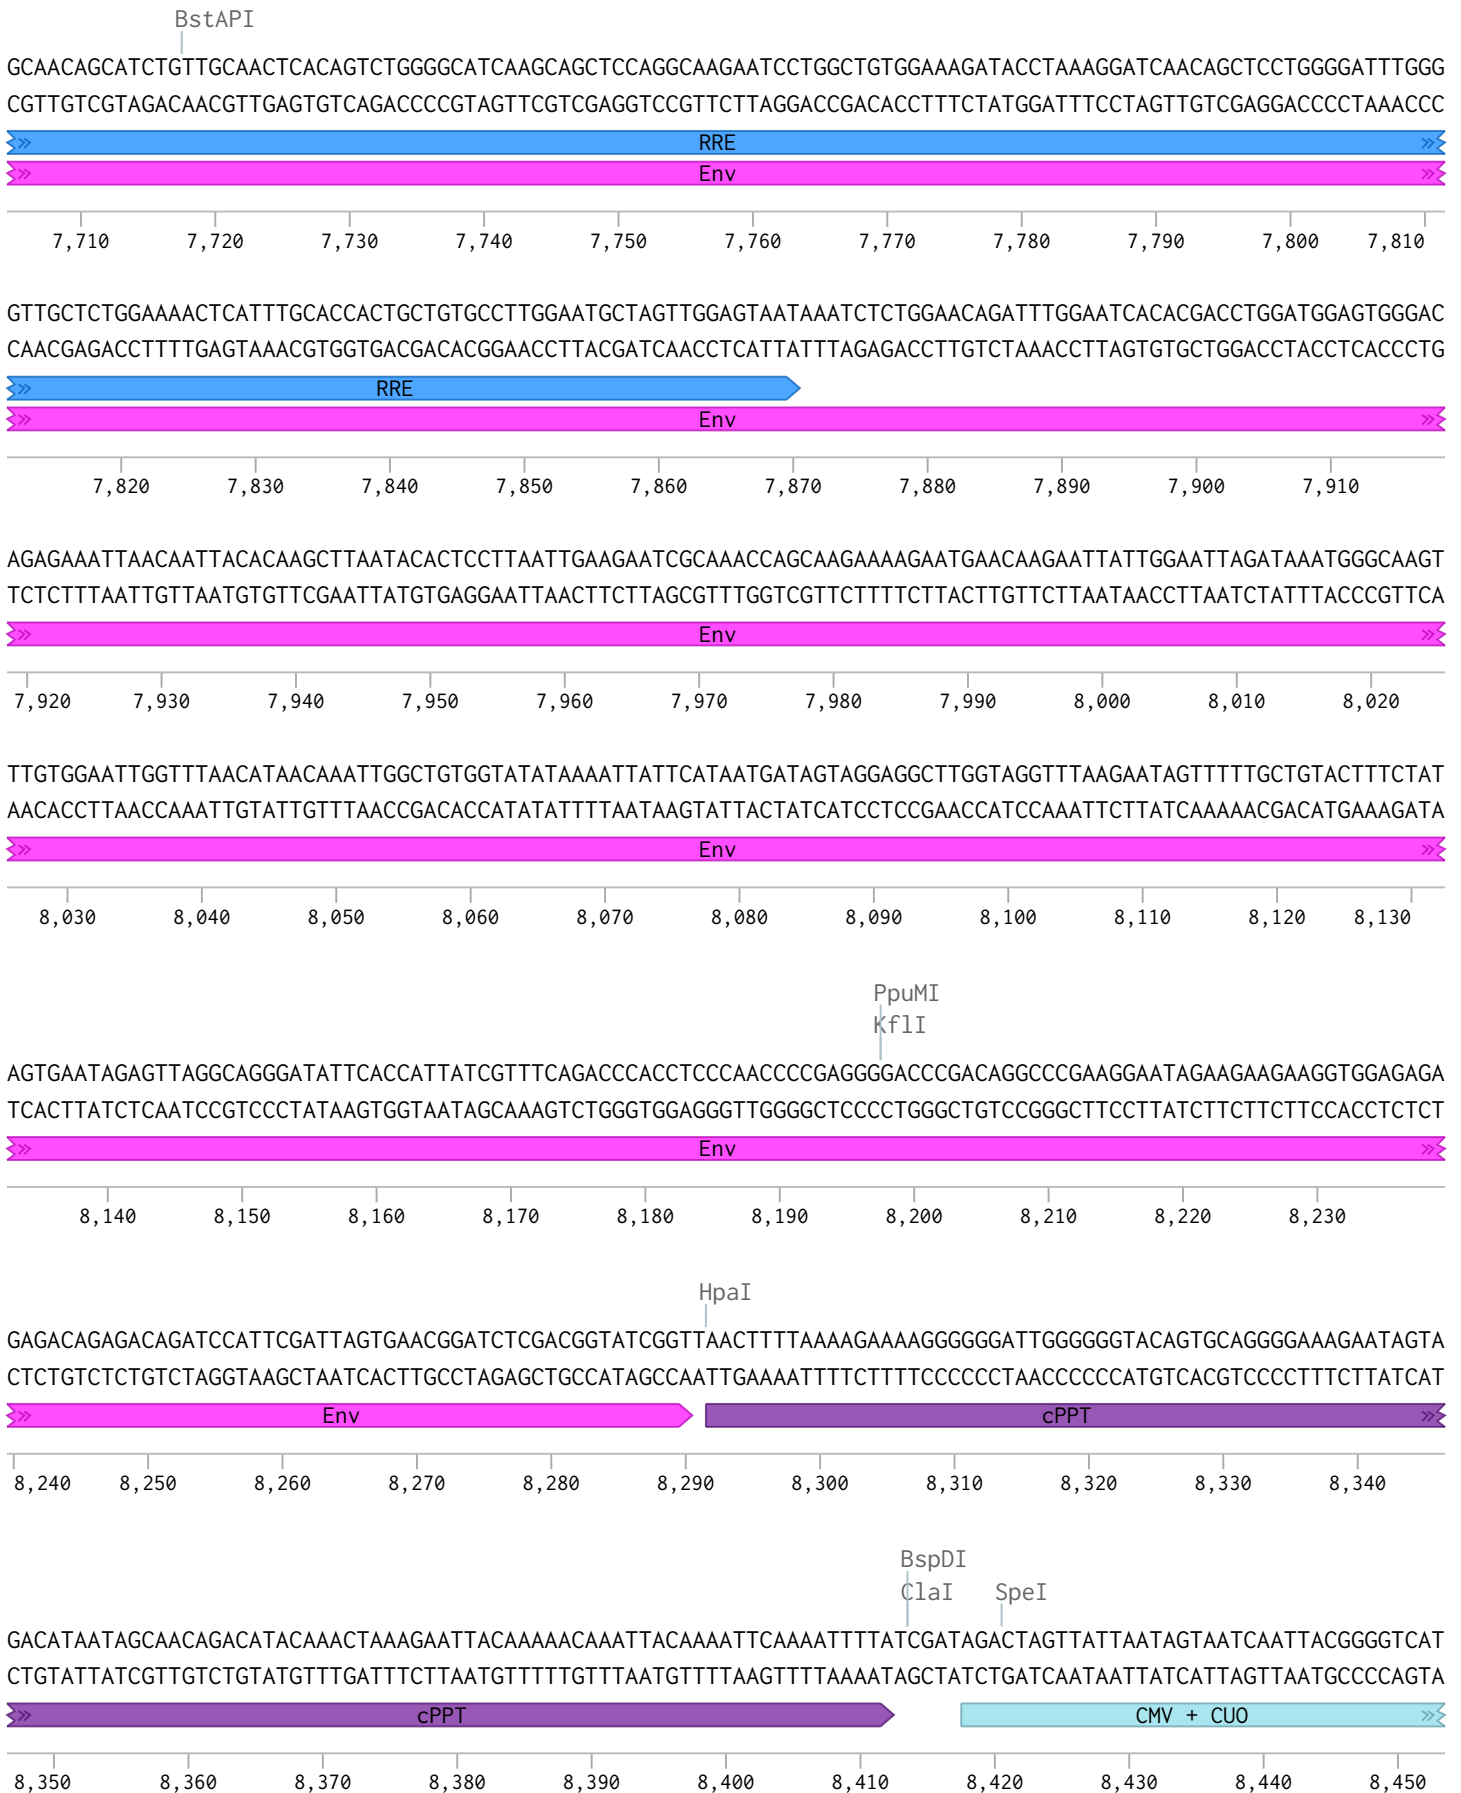



bArr2-HA-TEV219 pCDH-CuO-MCS-EF1 $\alpha$ -CymR-T2A-Bleo3 SparQ (10907 bp)

TAGTTCATAGCCCATATATGGAGTTCCGCGTTACATAA CTTACGGTAAATGGCCCGCCTGGCTGACCGCCCAACGACCCCGCCATTGACGTCAATAATGACGTAT  
ATCAAGTATCGGGTATATACCTCAAGGCGCAATGTATTGAATGCCATTTACCGGGCGGACCGACTGGCGGGTTGCTGGGGCGGGTA AACTGCAGTTATTACTGCATA

CMV + CUO

8,460 8,470 8,480 8,490 8,500 8,510 8,520 8,530 8,540 8,550 8,560

GTTCCCATAGTAACGCCAATAGGGACTTTCCATTGACGTCAATGGGTGGAGTATTTACGGTAAACTGCCACTTGGCAGTACATCAAGTGTATCATATGCCAAGTCC  
CAAGGGTATCATTGCGGTTATCCCTGAAAGGTA AACTGCAGTTACCCACCTCATAAATGCCATTTGACGGGTGAACCGTCATGTAGTTCACATAGTATACGGTTCAGG

CMV + CUO

8,570 8,580 8,590 8,600 8,610 8,620 8,630 8,640 8,650 8,660

GCCCCCTATTGACGTCAATGACGGTAAATGGCCCGCCTGGCATTATGCCCAGTACATGACCTTACGGGACTTTCCTACTTGGCAGTACATCTACGTATTAGTCATCG  
CGGGGATAACTGCAGTTACTGCCATTTACCGGGCGGACCGTAATACGGGTACTGACTGGAATGCCCTGAAAGGATGAACCGTCATGTAGATGCATAATCAGTAGC

CMV + CUO

8,670 8,680 8,690 8,700 8,710 8,720 8,730 8,740 8,750 8,760 8,770

CTATTACCATGGTATGCGGTTTTGGCAGTACACCAATGGGCGTGGATAGCGGTTTGACTCACGGGGATTTCCAAGTCTCCACCCATTGACGTCAATGGGAGTTTG  
GATAATGGTACCACTACGCCAAAACCGTCATGTGGTTACCCGCACCTATCGCCAAAAGTACTGAGTCCCTAAAGGTTTCAGAGGTGGGGTA AACTGCAGTTACCTCAAAC

CMV + CUO

8,780 8,790 8,800 8,810 8,820 8,830 8,840 8,850 8,860 8,870 8,880

TTTTGGCACCAAAATCAACGGGACTTTCCAAAATGTCGTAATACCCCGCCCCGTTGACGCAAATGGGCAAGCTTGCCGGGTGAGGTAGGCGTGTACGGTGGGAGG  
AAAACCGTGGTTTTAGTTGCCCTGAAAGGTTTTACAGCATTATGGGGCGGGGCAACTGCGTTTACCGTTGCAACGGCCAGCTCCATCCGCACATGCCACCCTCC

CMV + CUO

8,890 8,900 8,910 8,920 8,930 8,940 8,950 8,960 8,970 8,980

CCTATATAAGCAACCGGTATAATCAAACAGACCAGATTGTCTGTTTGTACCGGTGTTTAGTGAACCGGGCGCGCCTCATATCGCCTGGAGACGCCATCCACGCTGT  
GGATATATTCGTTGGCCATATTAGTTTGTCTGCTAACAGACAAACAATGGCCACAAATCACTTGGCCCGCGGAGTATAGCGGACCTCTGCGGTAGGTGCGACA

CMV + CUO

8,990 9,000 9,010 9,020 9,030 9,040 9,050 9,060 9,070 9,080 9,090

TTTGACCTCCATAGAAGACACCGGGACCGATCCAGCCTCCGCGTCACTCTTCCGCATCGCTGTCTGCGAGGGCCAGCTGTTGGGCTCGCGGTTGAGGACAAACT  
AAACTGGAGGTATCTTCTGTGGCCTGGCTAGGTCGGAGGCCAGTGAGAGAAGGCGTAGCGACAGACGCTCCCGGTGCAACAACCGAGCGCCA AACTCCTGTTTGA

CMV + CUO

9,100 9,110 9,120 9,130 9,140 9,150 9,160 9,170 9,180 9,190 9,200

bArr2-HA-TEV219 pCDH-CuO-MCS-EF1 $\alpha$ -CymR-T2A-Bleo3 SparQ (10907 bp)

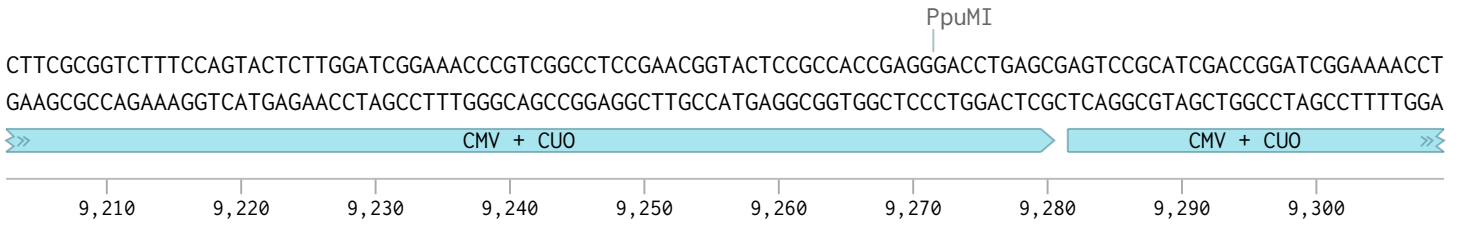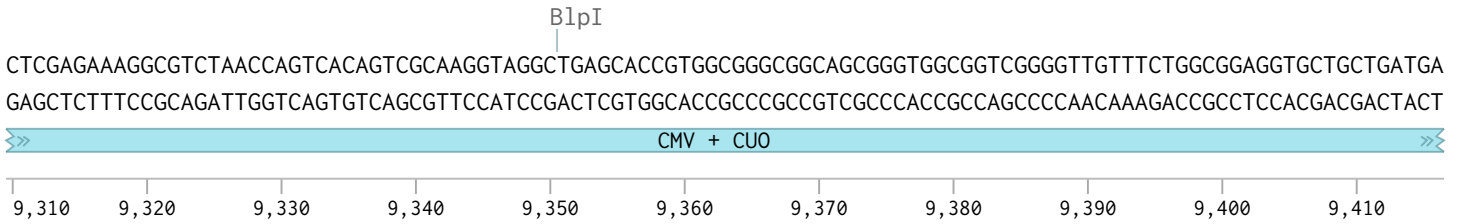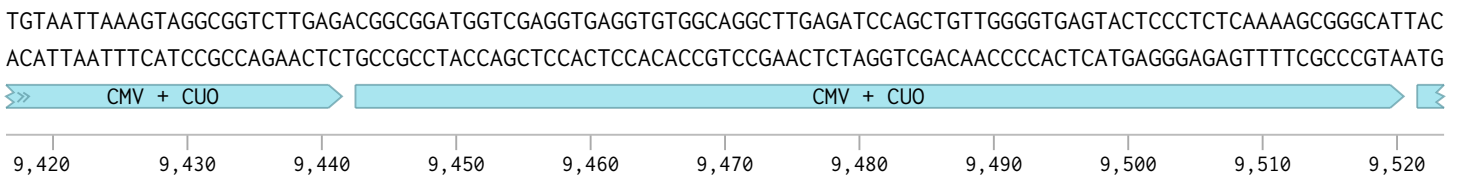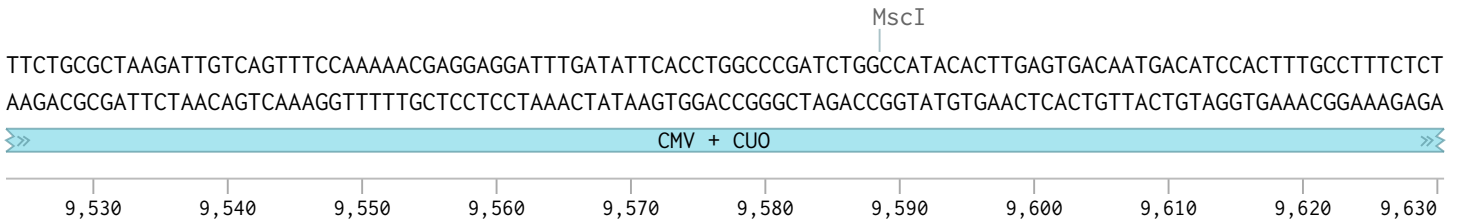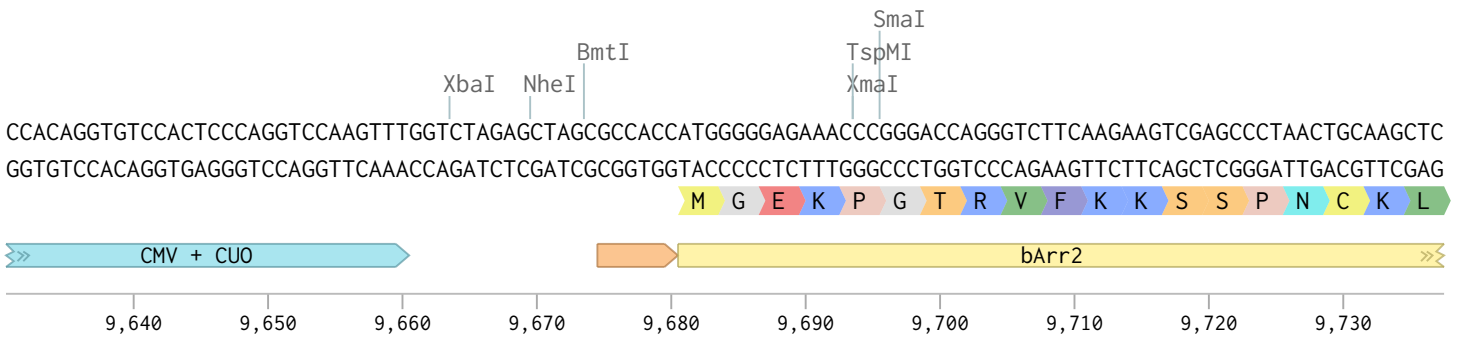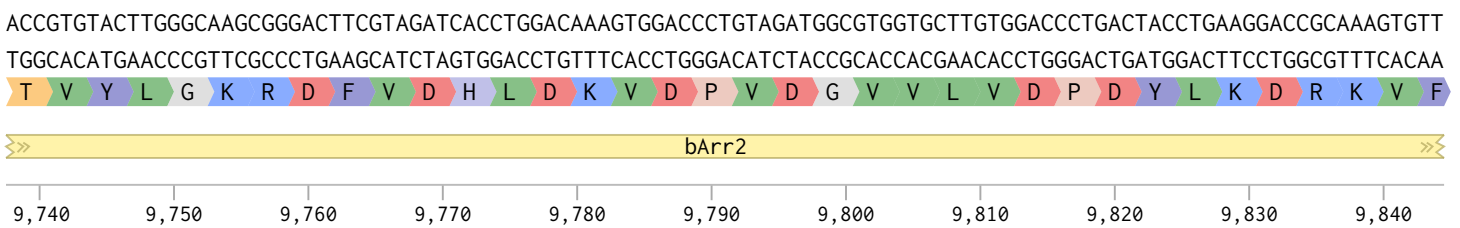

bArr2-HA-TEV219 pCDH-CuO-MCS-EF1 $\alpha$ -CymR-T2A-Bleo3 SparQ (10907 bp)

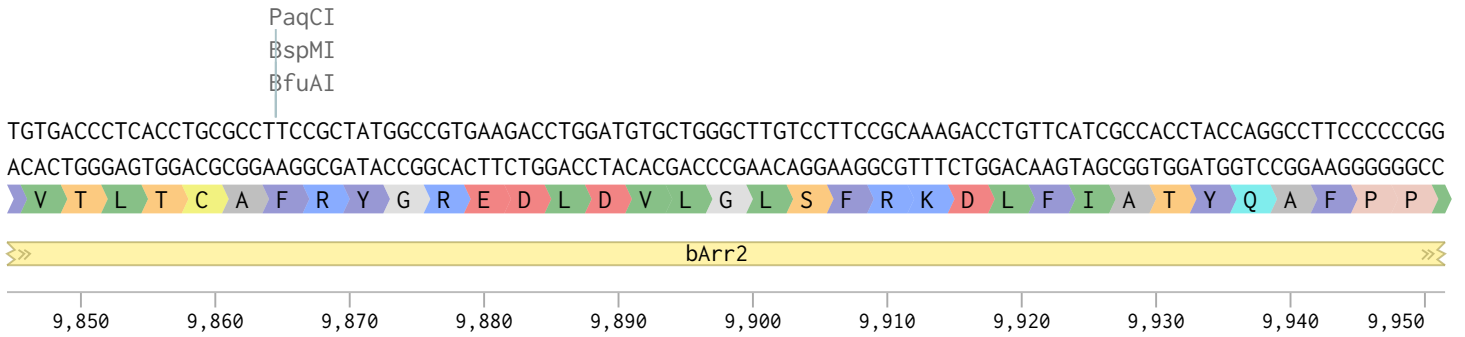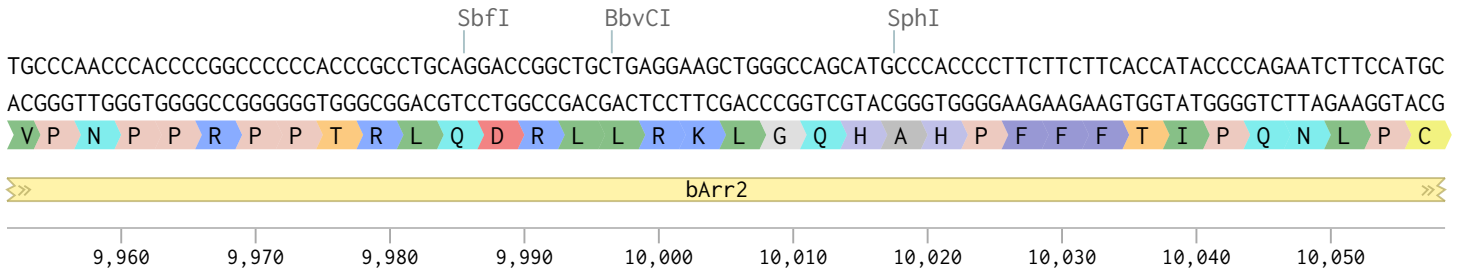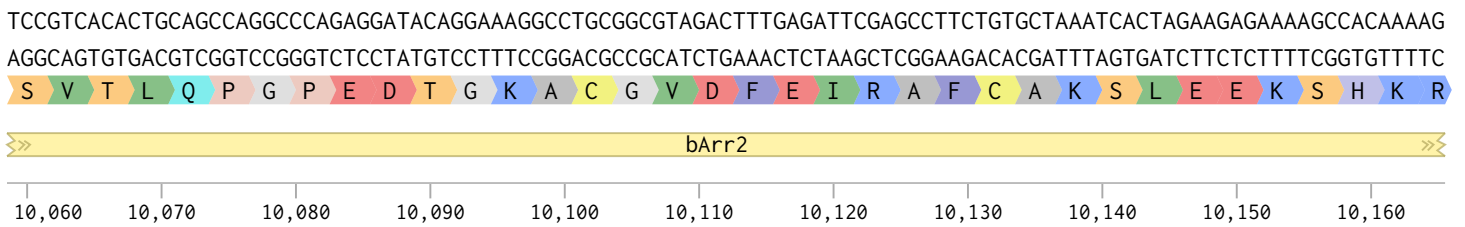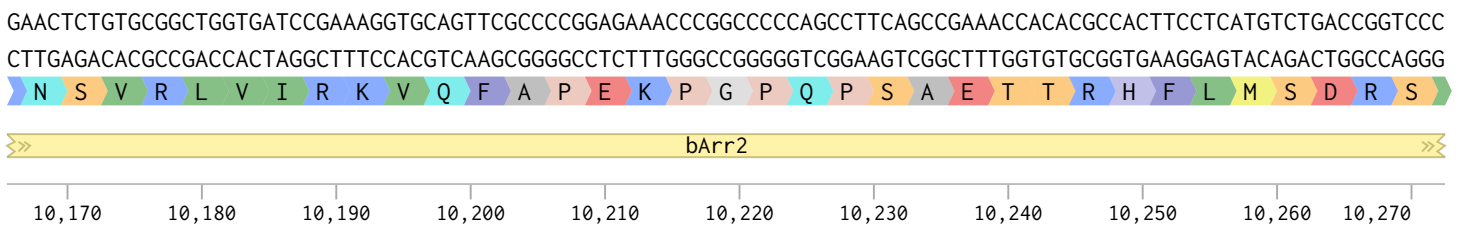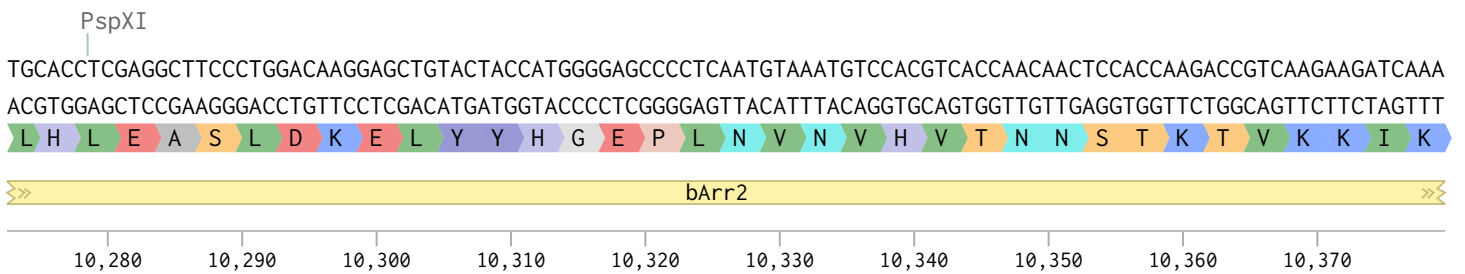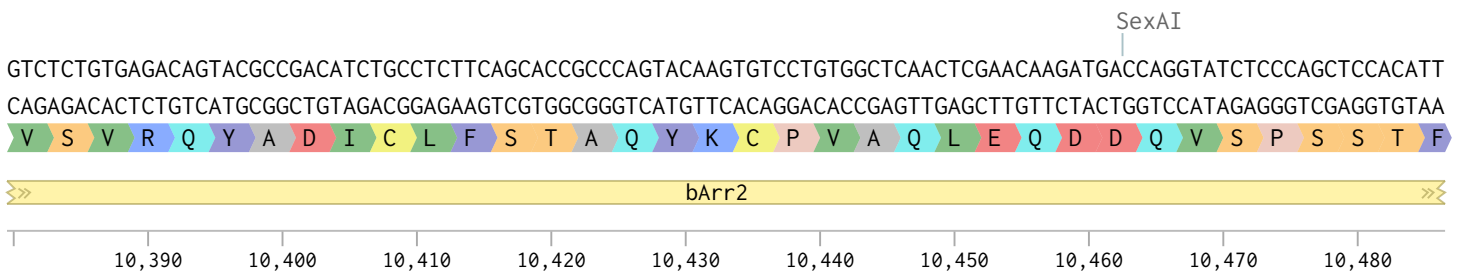

bArr2-HA-TEV219 pCDH-CuO-MCS-EF1 $\alpha$ -CymR-T2A-Bleo3 SparQ (10907 bp)

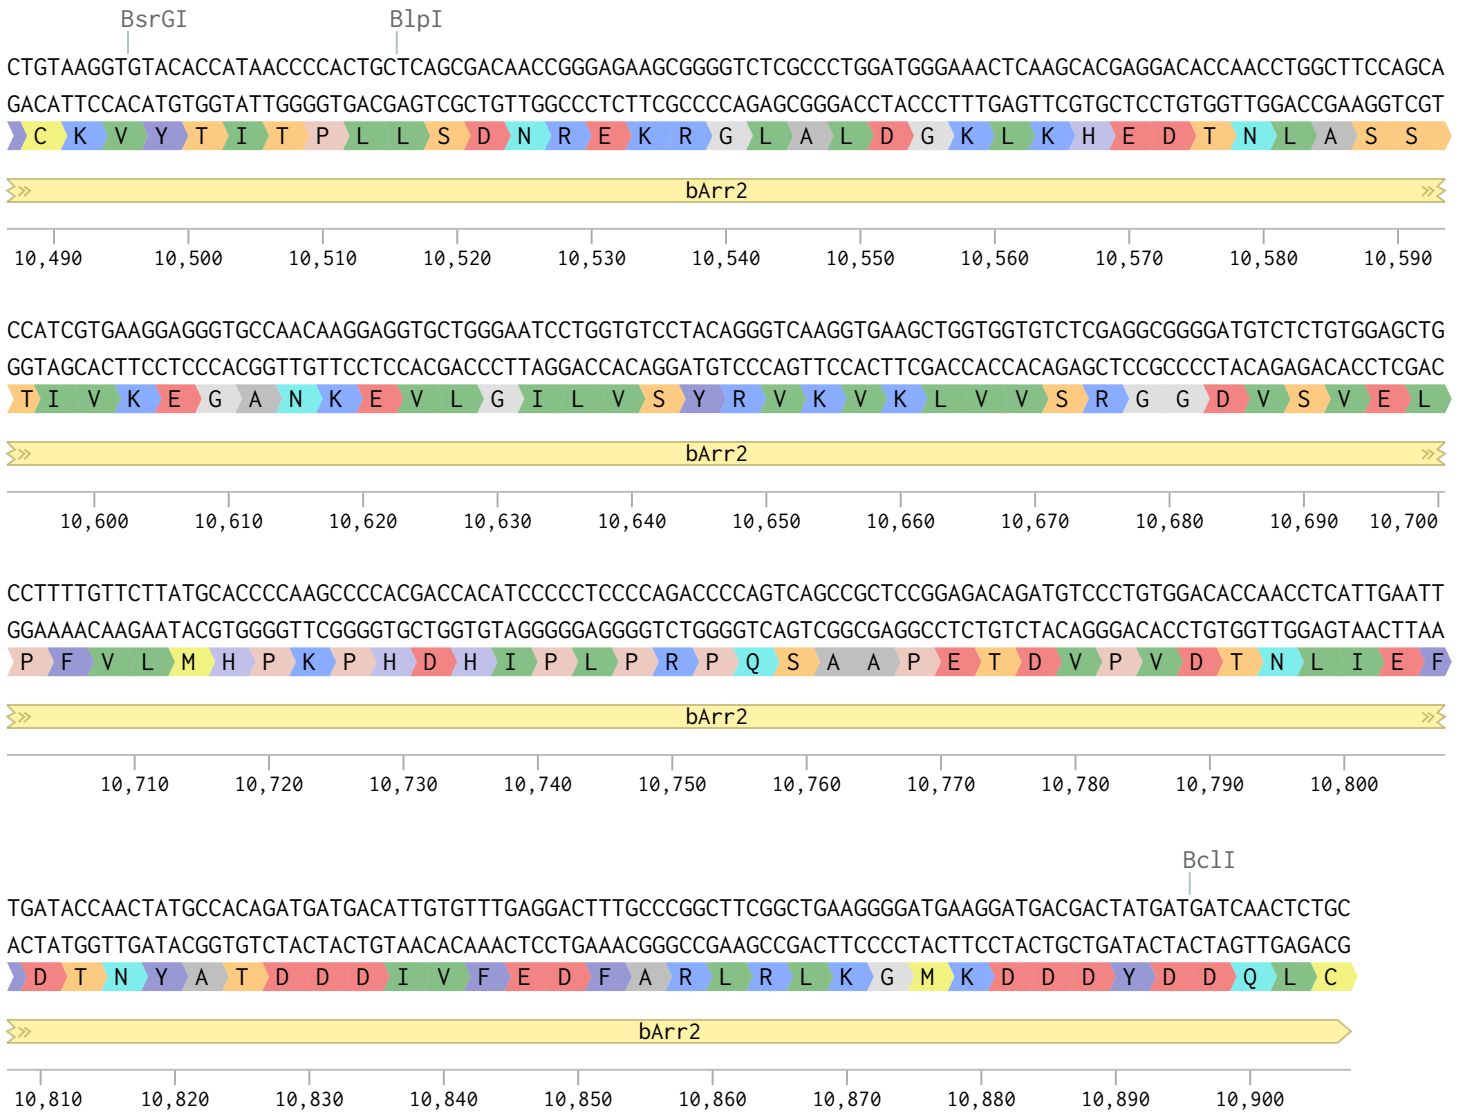

(from 1-749 bp)

# Fyve-HA-TEV219 pCDH-CuO-MCS-EF1 $\alpha$ -CymR-T2A-Bleo3...

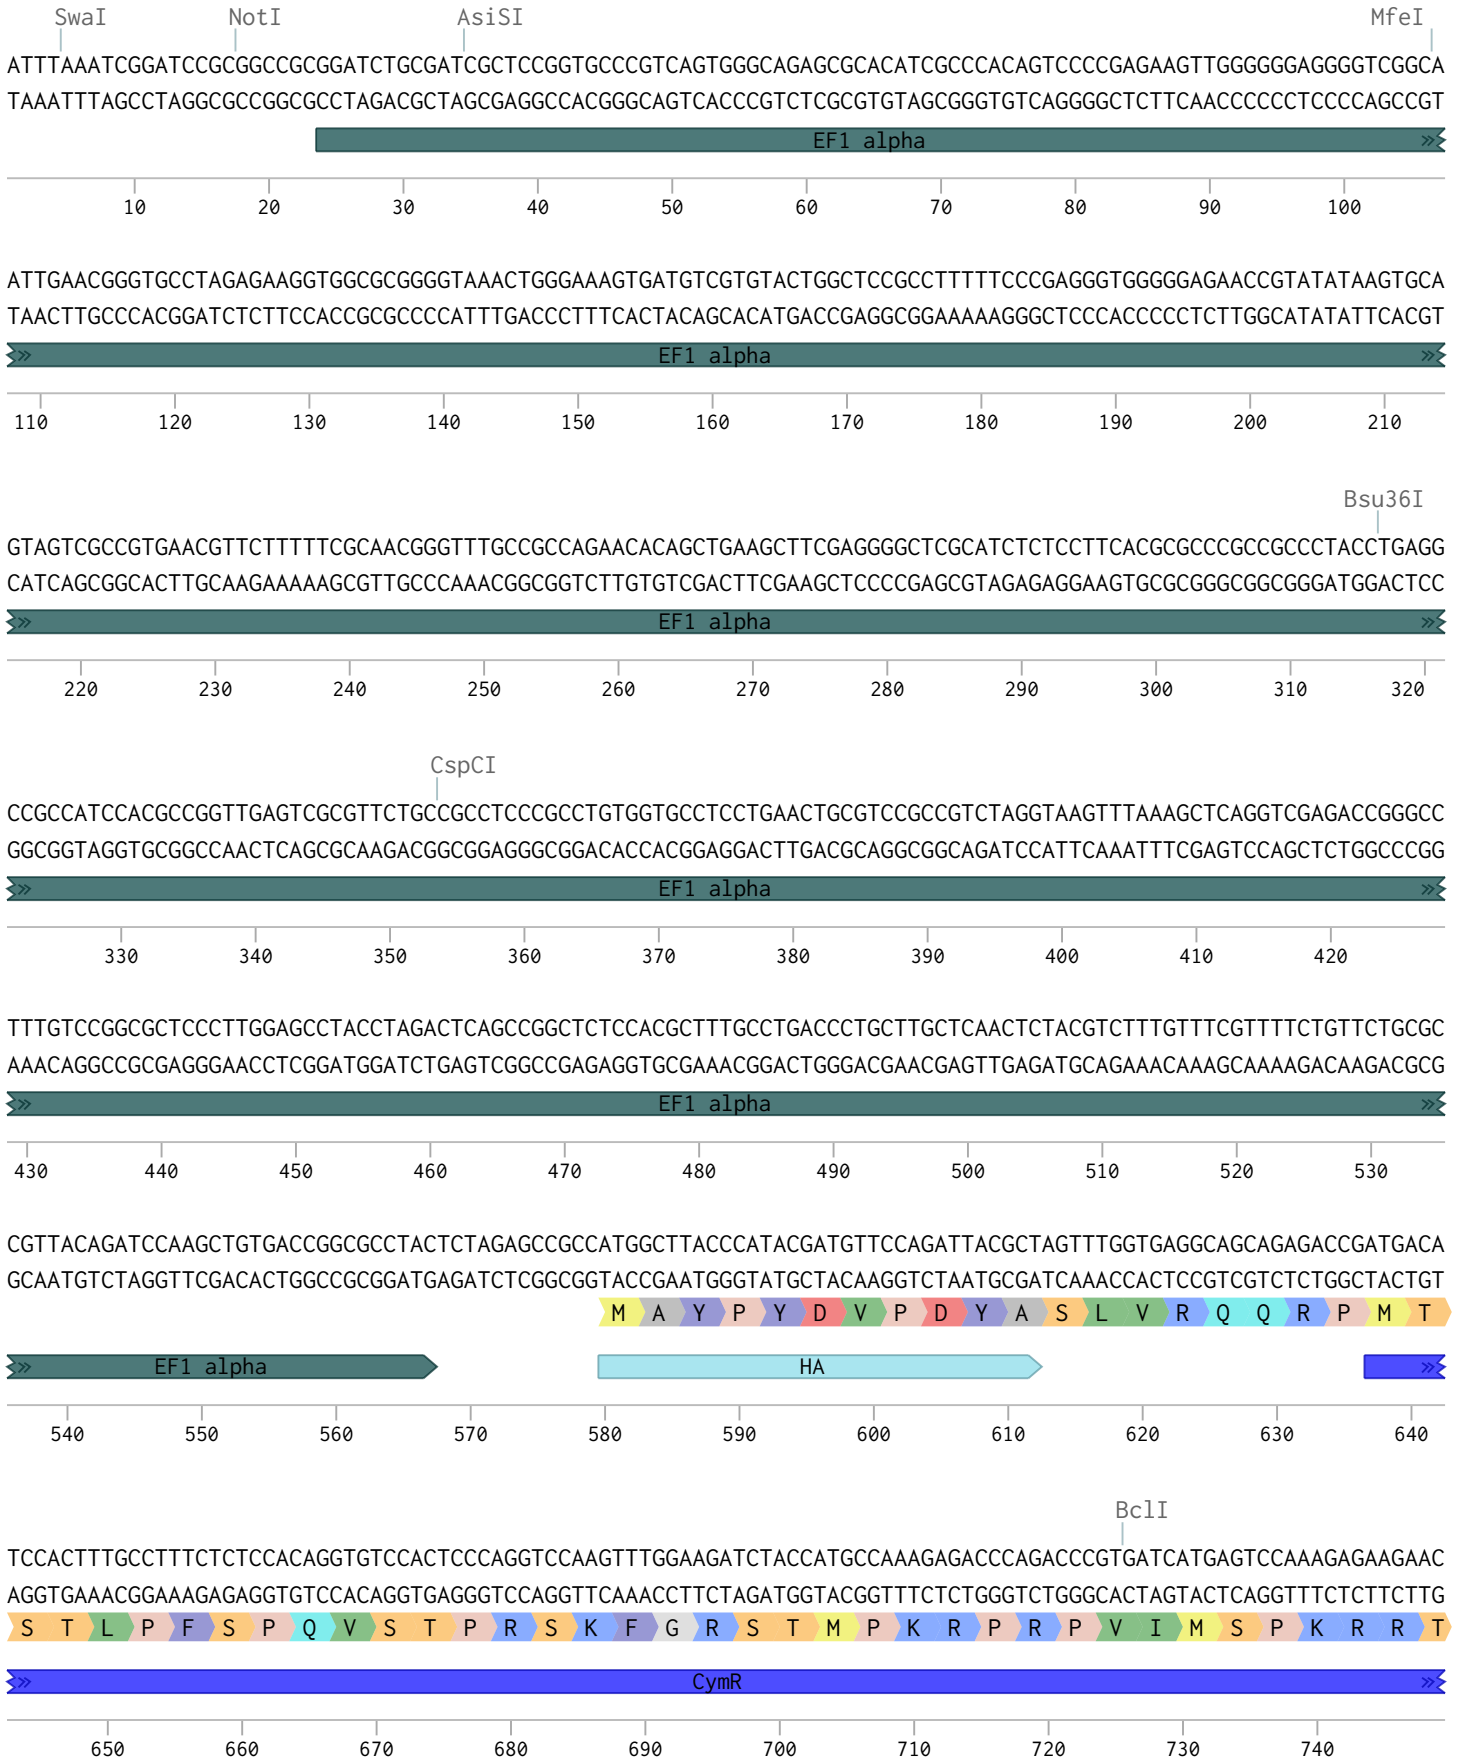

Fyve-HA-TEV219 pCDH-CuO-MCS-EF1 $\alpha$ -CymR-T2A-Bleo3 SparQ (10070 bp)

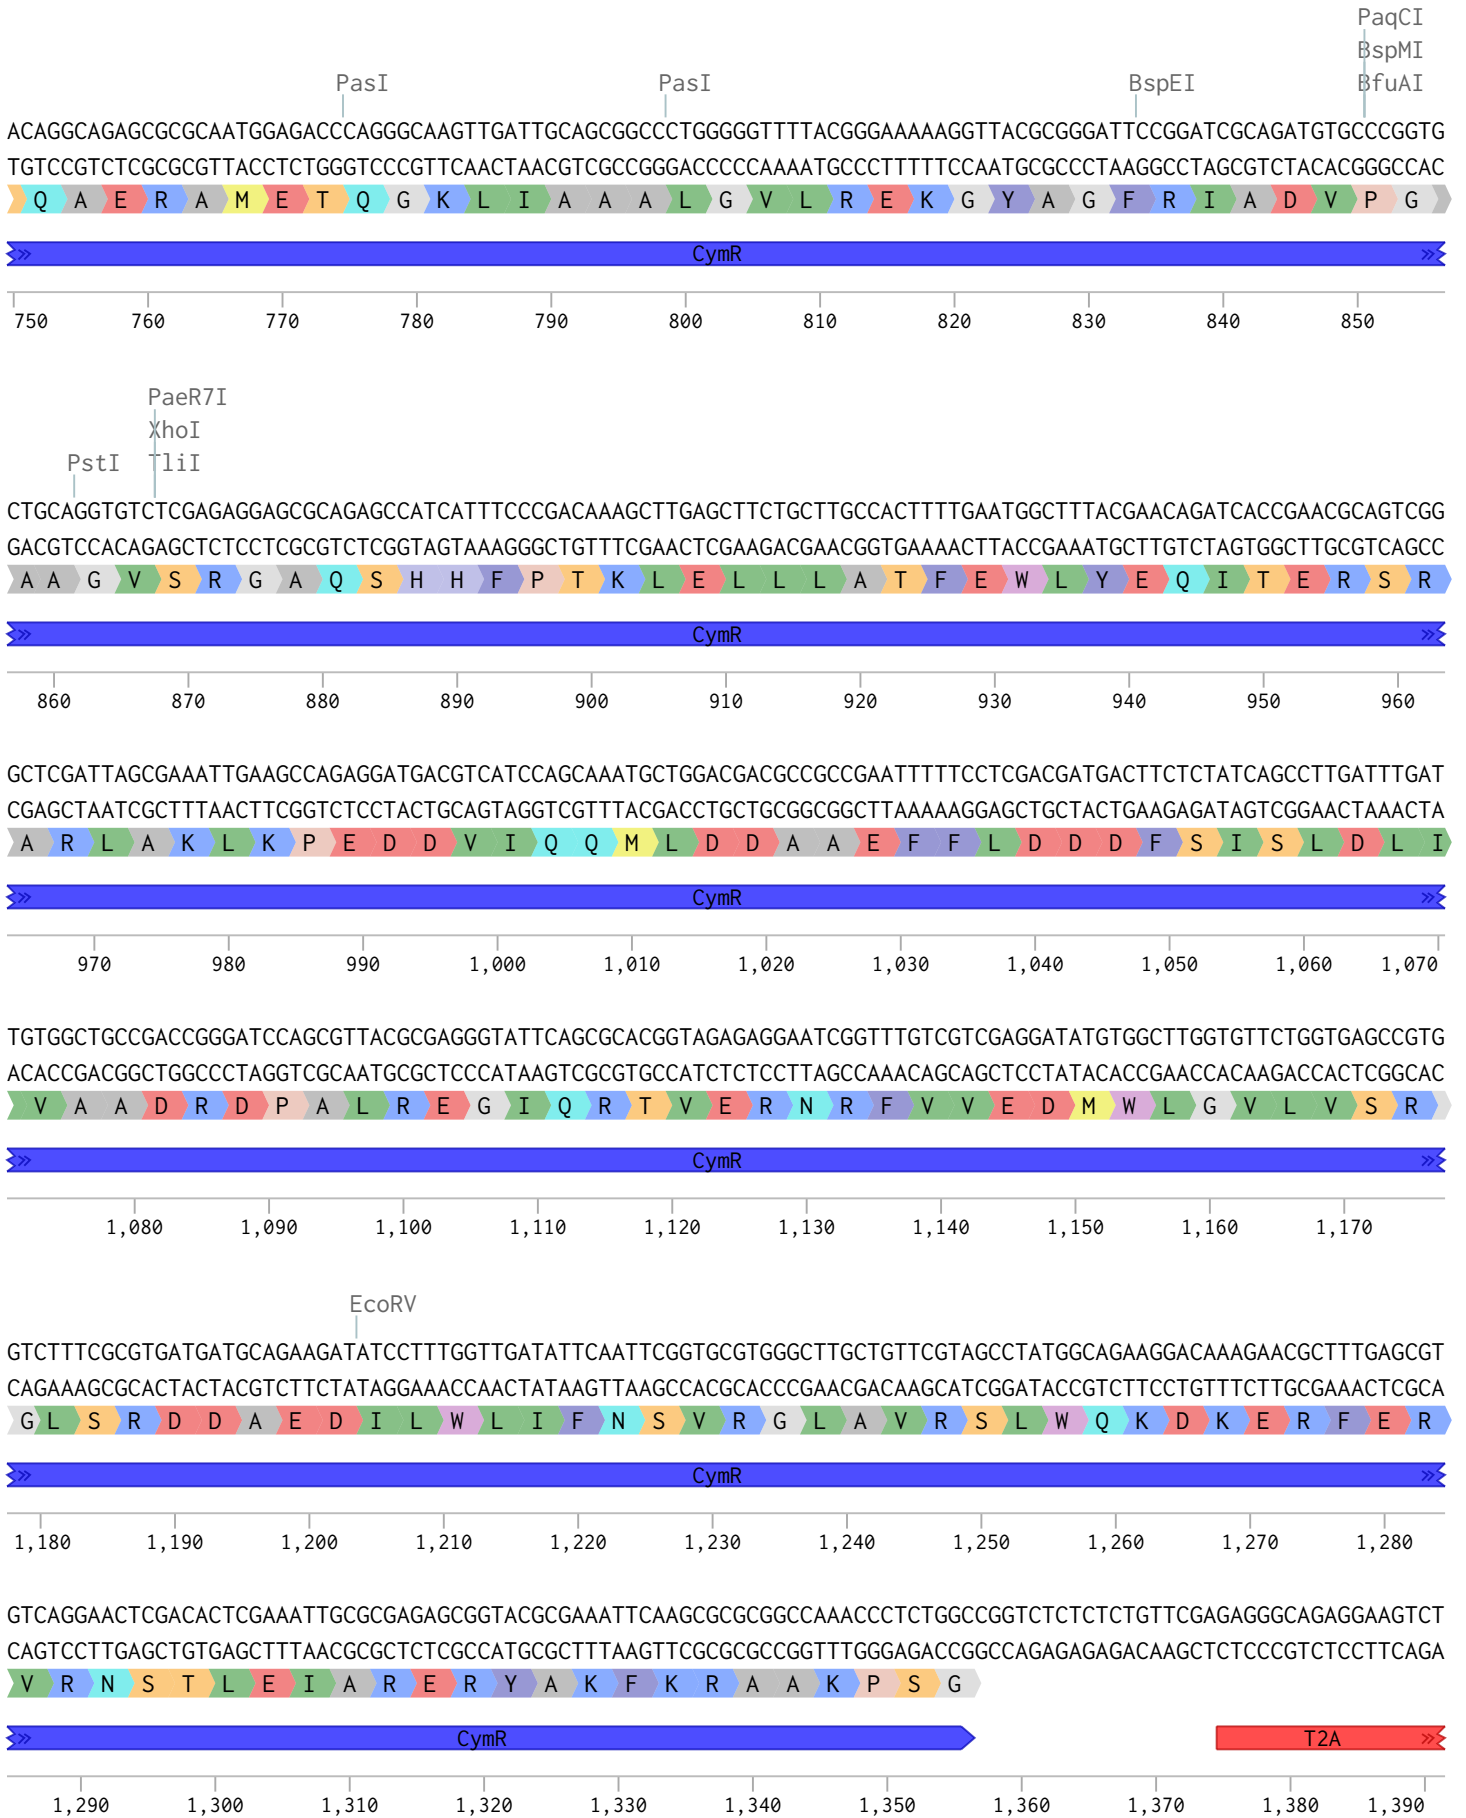

Fyve-HA-TEV219 pCDH-CuO-MCS-EF1 $\alpha$ -CymR-T2A-Bleo3 SparQ (10070 bp)

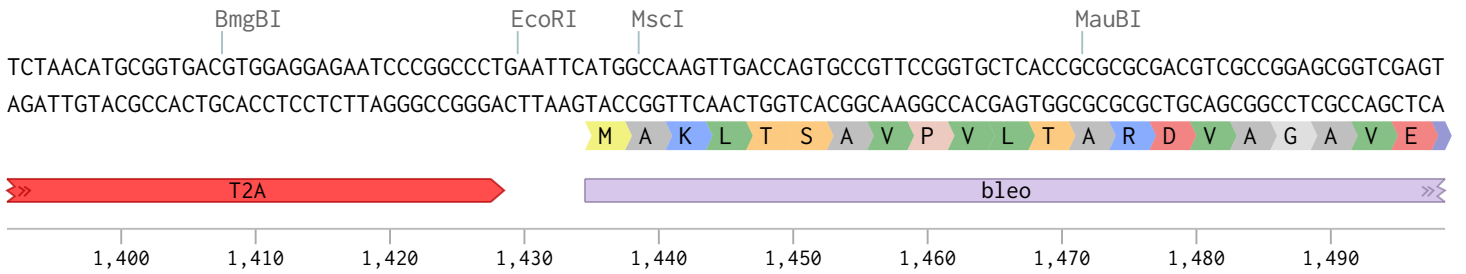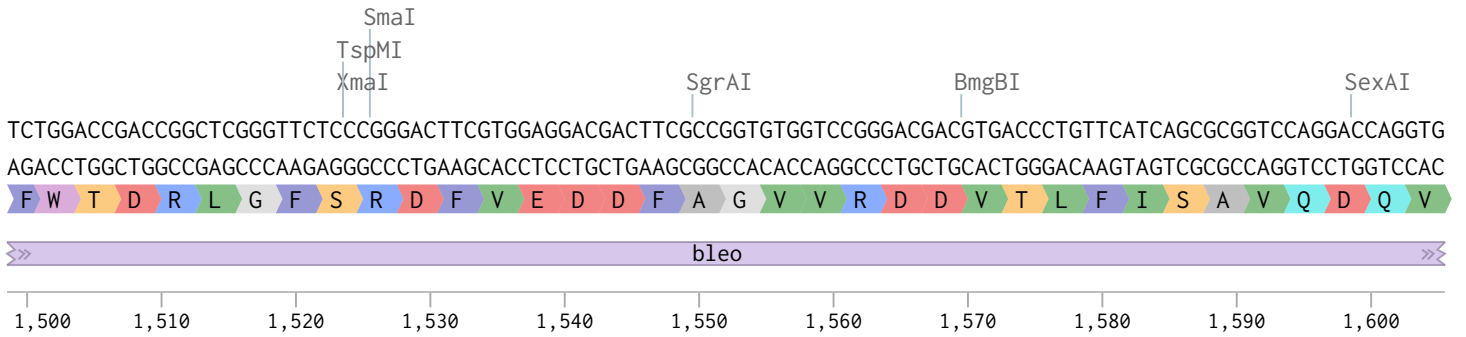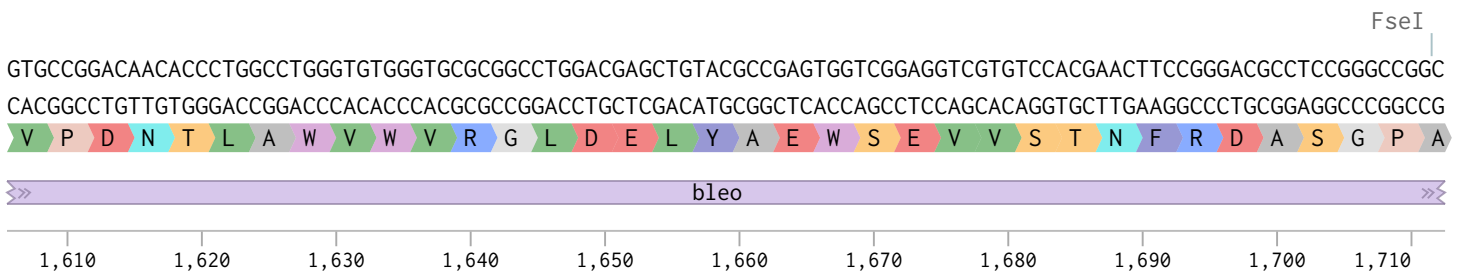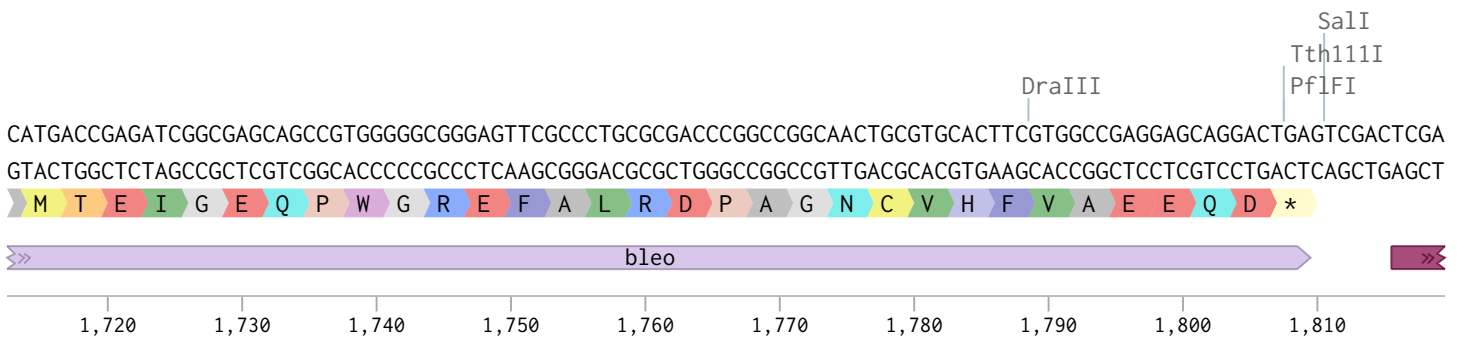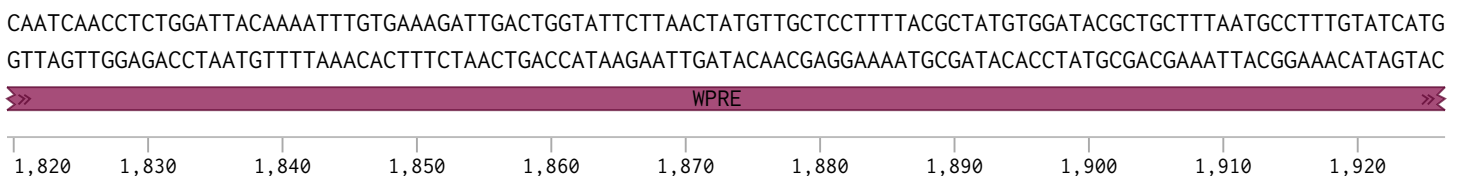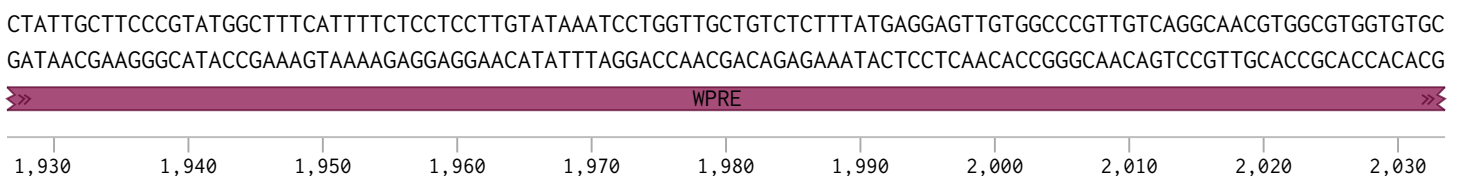

Fyve-HA-TEV219 pCDH-CuO-MCS-EF1 $\alpha$ -CymR-T2A-Bleo3 SparQ (10070 bp)

ACTGTGTTTGTGACGAACCCCACTGGTTGGGGCATTGCCACCACCTGTCAGCTCCTTCCGGGACTTTCGCTTCCCCCTCCCTATTGCCACGGCGAACTCAT  
TGACAAAACGACTGCGTTGGGGGTGACCAACCCCGTAACGGTGGTGGACAGTCGAGGAAAGGCCCTGAAAGCGAAAGGGGAGGGATAACGGTGCCGCTTGAGTA

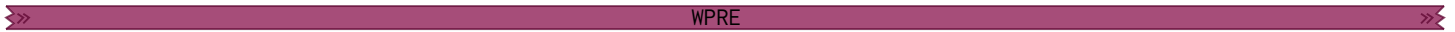

2,040 2,050 2,060 2,070 2,080 2,090 2,100 2,110 2,120 2,130 2,140

CGCCGCTGCCTTGCCCGTGTGACAGGGGCTCGGCTGTGGGCACTGACAATTCGTGGTGTGTCGGGAAATCATCGTCCTTCTTGGCTGCTGCCTGTG  
GCGGCGGACGGAACGGGCGACGACCTGTCCCGAGCCGACAACCCGTGACTGTTAAGGCACCACAACAGCCCTTTAGTAGCAGGAAAGGAACCGACGAGCGGACAC

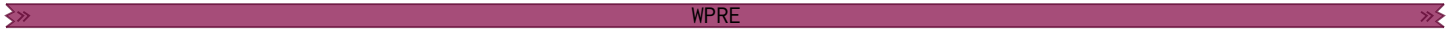

2,150 2,160 2,170 2,180 2,190 2,200 2,210 2,220 2,230 2,240

TTGCCACCTGGATTCTGCGCGGAGCTCCTTCTGCTACGTCCTTCGGCCCTCAATCCAGCGGACCTTCTTCCCGCGCTGCTGCCGGCTCTGCGGCTCTCCG  
AACGGTGGACCTAAGACGCGCCTGCAGGAAGACGATGCAGGAAGCCGGGAGTTAGGTGCCTGGAAGGAAGGGCGCCGACGACGGCCGAGACGCCGAGAAGGC

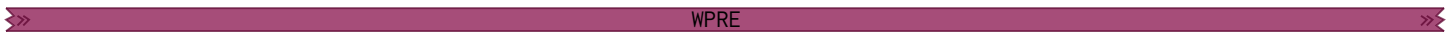

2,250 2,260 2,270 2,280 2,290 2,300 2,310 2,320 2,330 2,340 2,350

CGTCTTCGCTTCGCCCTCAGACGAGTCGGATCTCCCTTGGGCCGCTCCCGCCTGGTACCTTTAAGACCAATGACTTACAAGGCAGCTGTAGATCTTAGCCA  
GCAGAAGCGAAGCGGGAGTCTGCTCAGCCTAGAGGAAACCCGGCGGAGGGCGGACCATGAAATTTGTTACTGAATGTTCCGTCGACATCTAGAATCGGTGA

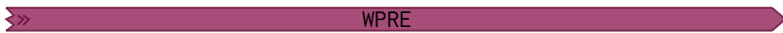

2,360 2,370 2,380 2,390 2,400 2,410 2,420 2,430 2,440 2,450 2,460

TTTTAAAAGAAAAGGGGGGACTGGAAGGGCTAATCACTCCAACGAAGATAAGATCTGCTTTTTGCTTGTACTGGGTCTCTGGTTAGACCAGATCTGAGCCTGG  
AAAATTTCTTTTCCCCCTGACCTTCCCGATTAAGTGAGGGTTGCTTCTATTCTAGACGAAAAACGAACATGACCCAGAGAGACCAATCTGGTCTAGACTCGGACC

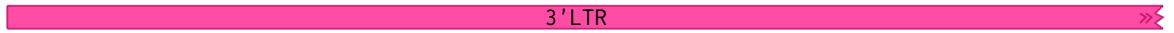

2,470 2,480 2,490 2,500 2,510 2,520 2,530 2,540 2,550 2,560

GAGCTCTCTGGTAAGTAACTAGGGAACCCACTGCTTAAGCCTCAATAAAGCTTGCCTTGTAGTCTTCAAGTAGTGTGCGCCGTCTGTTGTGTGACTCTGGTAACTAGAG  
CTCGAGAGACCGATTGATCCCTTGGTGACGAATTCGGAGTTATTTGAAACGGAACCTCACGAAGTTCATCACACACGGGCAGACAACACACTGAGACCATTGATCTC

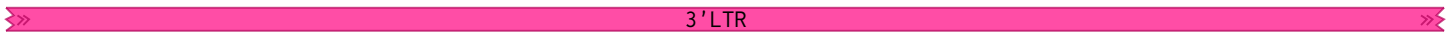

2,570 2,580 2,590 2,600 2,610 2,620 2,630 2,640 2,650 2,660 2,670

ATCCCTCAGACCCTTTAGTCAGTGTGAAAATCTCTAGCAGTAGTAGTTCATGTCATCTTATTATTCAGTATTTATAACTTGCAAAGAAATGAATATCAGAGAGTG  
TAGGGAGTCTGGGAAAATCAGTCACACCTTTAGAGATCGTCATCATCAAGTACAGTAGAATAATAAGTCATAAATATTGAACGTTTCTTTACTTATAGTCTCTCAC

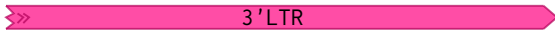

2,680 2,690 2,700 2,710 2,720 2,730 2,740 2,750 2,760 2,770 2,780

AGAGGAACTGTTTATTGCAGCTTATAATGGTTACAAAATAAGCAATAGCATCACAATTTACAAAATAAGCATTTTTTCTACTGCATTCTAGTTGTGGTTGTCC  
TCTCTTGAACAAAATAACGTCGAATATTACCAATGTTTATTTCGTTATCGTAGTGTTAAAGTGTTTATTTCGTAATAAAGTACGTAAGATCAACACCAACAGG

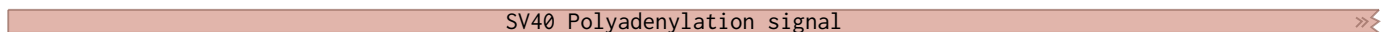

2,790 2,800 2,810 2,820 2,830 2,840 2,850 2,860 2,870 2,880



Fyve-HA-TEV219 pCDH-CuO-MCS-EF1 $\alpha$ -CymR-T2A-Bleo3 SparQ (10070 bp)

AAACTCATCAATGTATCTTATCATGTCTGGCTCTAGCTATCCCGCCCCTAACTCCGCCATCCCGCCCCTAACTCCGCCAGTTCGCCATTCTCCGCCCATGGC  
TTTGAGTAGTTACATAGAATAGTACAGACCGAGATCGATAGGGCGGGGATTGAGGCGGGTAGGGCGGGGATTGAGGCGGGTCAAGGCGGGTAAAGAGGCGGGTACCG

SV40 Polyade...tion signal SV40 Ori

2,890 2,900 2,910 2,920 2,930 2,940 2,950 2,960 2,970 2,980 2,990

SfiI StuI  
TGACTAATTTTTTTTATTTATGCAGAGGCCGAGGCCCTCGGCCTCTGAGCTATTCCAGAAGTAGTGAGGAGGCTTTTTTGGAGGCCTAGACTTTTGCAGAGACCA  
ACTGATTAATAAATAAATACGTCTCCGGCTCCGGCGGAGCCGGAGACTCGATAAGGTCTTCATCACTCCTCCGAAAAACCTCCGGATCTGAAAACGTCTCTGGT

SV40 Ori

3,000 3,010 3,020 3,030 3,040 3,050 3,060 3,070 3,080 3,090 3,100

AATTCGTAATCATGTCATAGCTGTTTCTGTGTGAAATTGTTATCCGCTCACAATCCACACAACATACGAGCCGGAAGCATAAAGTGAAAGCCTGGGGTGCCTAA  
TTAAGCATTAGTACAGTATCGACAAAGGACACACTTTAACAATAGGCGAGTGTTAAGGTGTGTTGTATGCTCGGCCTTCGTATTTACATTTTCGGACCCACGGATT

3,110 3,120 3,130 3,140 3,150 3,160 3,170 3,180 3,190 3,200 3,210

TGAGTGAGCTAACTCACATTAATTGCGTTGCGCTCACTGCCGCTTTCCAGTCGGAAACCTGTCGTGCCAGCTGCATTAATGAATCGGCCAACGCGCGGGGAGAGG  
ACTCACTCGATTGAGTGTAATTAAACGCAACGCGAGTGACGGCGAAAGGTGAGCCCTTTGGACAGCACGGTCGACGTAATTACTTAGCCGTTGCGGCCCTCTCC

3,220 3,230 3,240 3,250 3,260 3,270 3,280 3,290 3,300 3,310

BspQI SapI  
CGGTTTTCGTATTGGGCGCTCTCCGCTTCTCGCTCACTGACTCGCTGCGCTCGGTGTTTCGGCTGCGGCGAGCGGTATCAGCTCACTCAAAGGCGGTAATACGGT  
GCCAAACGCATAACCCGCGAGAAGGCGAAGGAGCGAGTGACTGAGCGACGCGAGCCAGCAAGCCGACGCGCTCGCCATAGTCGAGTGAGTTTCCGCCATTATGCCA

3,320 3,330 3,340 3,350 3,360 3,370 3,380 3,390 3,400 3,410 3,420

AflIII PciI  
TATCCACAGAATCAGGGGATAACGCAGGAAAGAATGTGAGCAAAAGGCCAGCAAAAGGCCAGGAACCGTAAAAAGGCCGCGTTGCTGGCGTTTTTCCATAGGCTC  
ATAGGTGTCTTAGTCCCTATTGCGTCTTTCTGTACTCGTTTTCCGGTCTTTCCGGTCTTGGCATTTCGCGCGCAACGACCGCAAAAAGGTATCCGAG

pUC ori

3,430 3,440 3,450 3,460 3,470 3,480 3,490 3,500 3,510 3,520 3,530

CGCCCCCTGACGAGCATCACAAAAATCGACGCTCAAGTCAGAGGTGGCGAAACCCGACAGGACTATAAAGATACCAGGCGTTTCCCCTGGAAGCTCCCTCGTGCG  
GCGGGGGACTGCTCGTAGTGTTTTTAGCTGCGAGTTTCAGTCTCCACCGCTTTGGGCTGTCTGATTTCTATGGTCCGAAAGGGGACCTTCGAGGGAGCACGC

pUC ori

3,540 3,550 3,560 3,570 3,580 3,590 3,600 3,610 3,620 3,630

CTCTCTGTTCCGACCTGCCGCTTACCGGATACCTGTCCGCTTTCTCCCTTCGGAAGCGTGCGCTTTCTCATAGCTCACGCTGTAGGTATCTCAGTTCCGGTGT  
GAGAGGACAAGGCTGGGACGGCGAATGGCCTATGGACAGGCGAAAGAGGGAAGCCCTTCGCACCGGAAAGAGTATCGAGTGCGACATCCATAGAGTCAAGCCACA

pUC ori

3,640 3,650 3,660 3,670 3,680 3,690 3,700 3,710 3,720 3,730 3,740

Fyve-HA-TEV219 pCDH-CuO-MCS-EF1 $\alpha$ -CymR-T2A-Bleo3 SparQ (10070 bp)

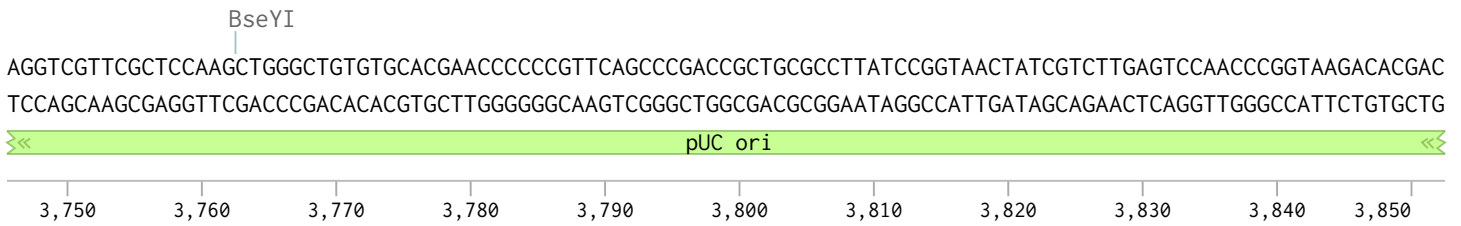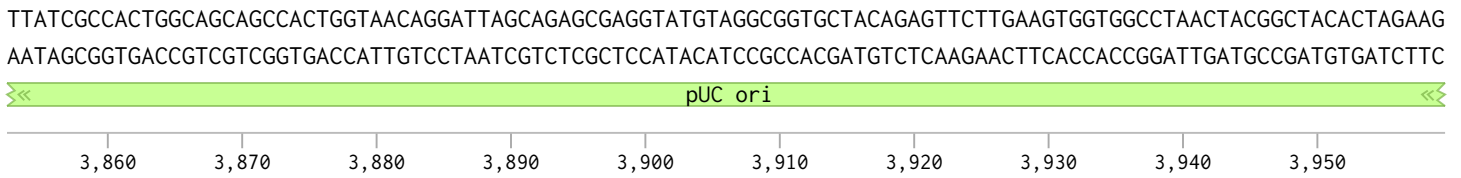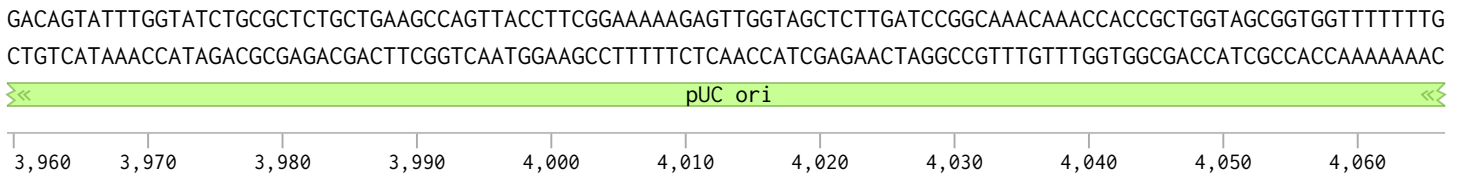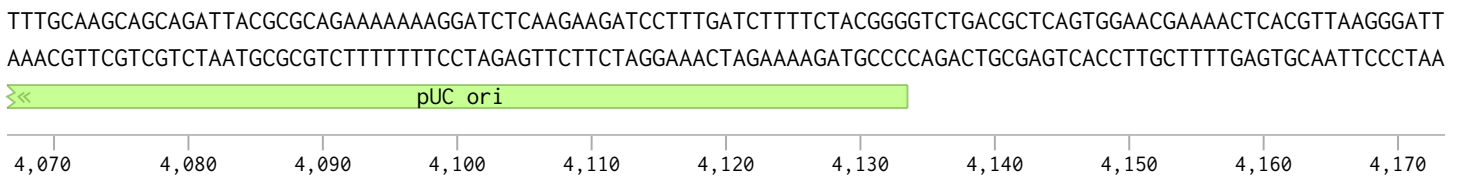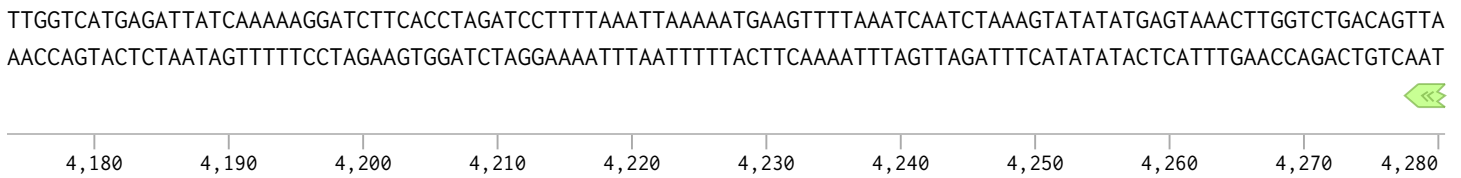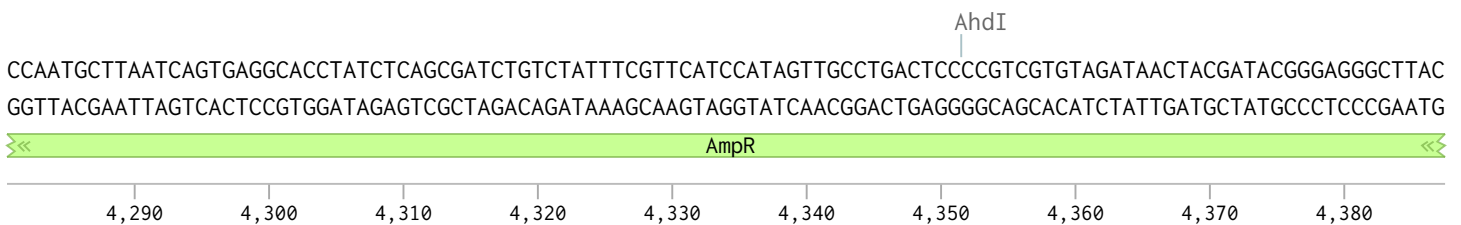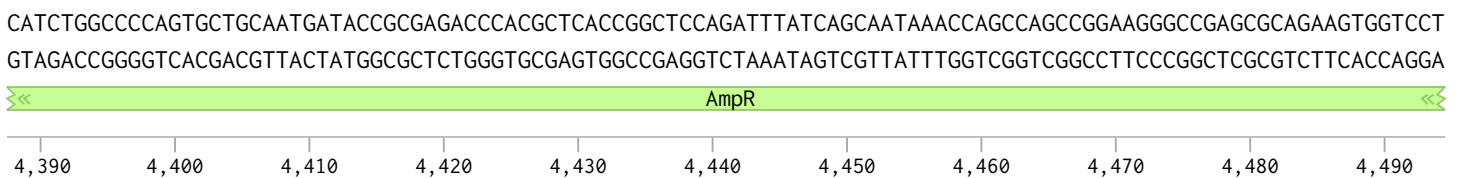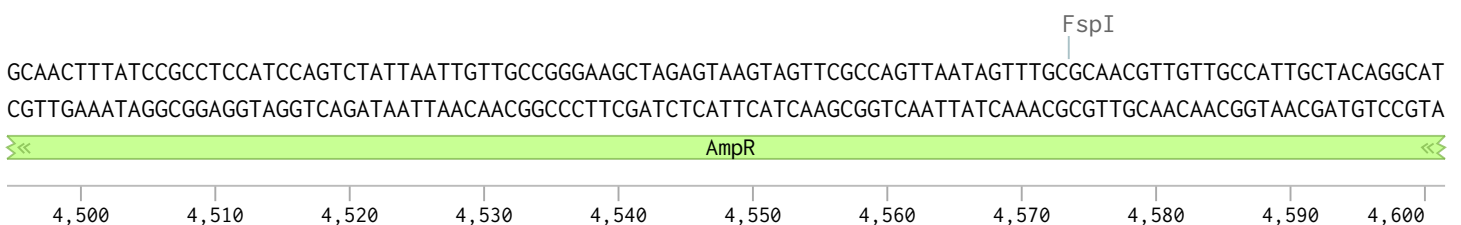

Fyve-HA-TEV219 pCDH-CuO-MCS-EF1 $\alpha$ -CymR-T2A-Bleo3 SparQ (10070 bp)

CGTGGTGTACGCTCGTCGTTTGGTATGGCTTCATTCAGCTCCGGTCCCAACGATCAAGGCGAGTTACATGATCCCCATGTTGTGCAAAAAAGCGTTAGCTCCT  
GCACCACAGTGCAGCAGCAAACCATAACCGAAGTAAGTCGAGGCCAAGGGTCTAGTTCGCTCAATGTACTAGGGGGTACAACACGTTTTTTTCGCCAATCGAGGA

«« AmpR »»

4,610 4,620 4,630 4,640 4,650 4,660 4,670 4,680 4,690 4,700

TCCGTCTCCGATCGTTGTGAGAAGTAAGTTGGCCGAGTGTATCACTCATGGTTATGGCAGCACTGCATAATTCTTACTGTCATGCCATCCGTAAGATGCTTT  
AGCCAGGAGGCTAGCAACAGTCTTCATCAACCGCGCTCACAATAGTGAGTACCAATACCGTCTGACGTATTAAGAGAATGACAGTACGGTAGGCATTCTACGAAA

«« AmpR »»

4,710 4,720 4,730 4,740 4,750 4,760 4,770 4,780 4,790 4,800 4,810

TCTGTGACTGGTGTACTCAACCAAGTCATTCTGAGAATAGTGTATGCGGCGACCGAGTTGCTCTTGCCCGCGTCAATACGGGATAATACCGGCCACATAGCAG  
AGACTGACCACTCATGAGTTGGTTCAGTAAGACTCTTATCACATACGCCGCTGGTCAACGAGAACGGGCCGAGTTATGCCCTATTATGGCGCGGTGTATCGTC

«« AmpR »»

4,820 4,830 4,840 4,850 4,860 4,870 4,880 4,890 4,900 4,910 4,920

XmnI

AACITTTAAAAGTGTCTCATCATTGAAAAACGTTCTTCGGGGCGAAAACCTCTCAAGGATCTTACCGCTGTTGAGATCCAGTTCGATGTAACCCACTCGTGCACCCAAC  
TTGAAATTTTACAGAGTAGAACCTTTTGAAGAAGCCCGCTTTTGAAGATTCTAGAATGGCGACAACCTTAGGTCAAGCTACATTGGGTGAGCACGTGGGTTGA

«« AmpR »»

4,930 4,940 4,950 4,960 4,970 4,980 4,990 5,000 5,010 5,020

GATCTTCAGCATCTTTTACTTTACCAGCGTTTCTGGGTGAGCAAAAACAGGAAGGCAAAATGCCGCAAAAAGGGAATAAGGGCGACACGGAAATGTTGAATACTC  
CTAGAAGTCGTAGAAAATGAAAGTGGTCGAAAGACCCACTCGTTTTTGTCTTCCGTTTTACGGCGTTTTTCCCTTATTCGCCGTGTGCCTTTACAACCTTATGAG

«« AmpR »»

5,030 5,040 5,050 5,060 5,070 5,080 5,090 5,100 5,110 5,120 5,130

SspI

ATACTCTTCTTTTTCAATATTATTGAAGCATTATCAGGGTATTGTCTCATGAGCGGATACATATTTGAATGTATTTAGAAAAATAACAATAGGGGTTCCGCG  
TATGAGAAGGAAAAAGTTATAAATACTTCGTAATAGTCCCAATAACAGAGTACTCGCCTATGTATAAATACATAAATCTTTTTATTTGTTTATCCCAAGGCGC

»»

5,140 5,150 5,160 5,170 5,180 5,190 5,200 5,210 5,220 5,230 5,240

CACATTTCCCGAAAAGTGCCACCTGACGTCTAAGAAACCATTATTATCATGACATTAACCTATAAAAATAGGCGTATCAGAGGCCCTTCGTCTCGCGGTTTCG  
GTGTAAGGGGCTTTTACGGTGGACTGCAGATTCTTGGTAATAATGACTGTAAATGGATATTTTTATCCGCATAGTGCTCCGGGAAAGCAGAGCGCGCAAAGC

5,250 5,260 5,270 5,280 5,290 5,300 5,310 5,320 5,330 5,340 5,350

GTGATGACGGTGAAAACCTCTGACACATGCAGCTCCCGGAGACGGTCACAGCTTGTCTGTAAGCGGATGCCGGGAGCAGACAAGCCCGTCAGGGCGCGTCAGCGGGT  
CACTACTGCCACTTTTGGAGACTGTGTACGTCGAGGGCCTCTGCCAGTGTGCAACAGACATTGCGCTACGGCCCTCGTCTGTTCCGGCAGTCCCGCGCAGTCGCCCA

5,360 5,370 5,380 5,390 5,400 5,410 5,420 5,430 5,440 5,450

Fyve-HA-TEV219 pCDH-CuO-MCS-EF1 $\alpha$ -CymR-T2A-Bleo3 SparQ (10070 bp)

GTTGGCGGGTGTCTGGGGCTGGCTTAACTATGCGGCATCAGAGCAGATTGACTGAGAGTGCACCATATGCGGTGTGAAATACCGCACAGATGCGTAAGGAGAAAATA  
 CAACCGCCACAGCCCCGACCGAATTGATACGCCGTAGTCTCGTCTAACATGACTCTCACGTGGTATACGCCACACTTATGGCGGTGTCTACGCATTCCTCTTTTAT

5,460 5,470 5,480 5,490 5,500 5,510 5,520 5,530 5,540 5,550 5,560

CCGCATCAGCGCCATTTCGCCATTCAGGCTGCGCAACTGTTGGGAAGGGCGATCGGTGCGGGCCTCTTCGCTATTACGCCAGCTGGCGAAAGGGGGATGTGCTGCAA  
 GGCGTAGTCCGCGTAAGCGGTAAGTCCGACGCGTTGACAACCTTCCCGTAGCCACGCCGGAGAAGCGATAATGCGGTGACCGCTTCCCCCTACACGACGTT

5,570 5,580 5,590 5,600 5,610 5,620 5,630 5,640 5,650 5,660 5,670

GGCGATTAAGTTGGTAACGCCAGGGTTTTCCAGTCACGACGTTGTAAAACGACGGCCAGTGCCAAAGTACGCGGTGTAGTCTTATGCAATACTCTGTAGTCTTG  
 CCGCTAATCAACCCATTGCGGTCCAAAAGGGTCAAGTGTGCAACATTTGCTGCCGTCACGGTTCGACTGCGCACATCAGAATACGTTATGAGAACATCAGAAC

5,680 5,690 5,700 5,710 5,720 5,730 5,740 5,750 5,760 5,770

CAACATGGTAACGATGAGTTAGCAACATGCCTTACAAGGAGAGAAAAAGCACCGTGCATGCCGATTGGTGAAGTAAGTGGTACGATCGTGCCTTATTAGGAAGGC  
 GTTGTACCATTGCTACTCAATCGTTGTACGGAATGTTCTCTCTTTTTCGTGGCAGTACGGTAACACCTTCATTCCACCATGCTAGCACGGAATAATCCTTCCG

5,780 5,790 5,800 5,810 5,820 5,830 5,840 5,850 5,860 5,870 5,880

AACAGACGGTCTGACATGGATTGGACGAACCACTGAATTGCCGATTGCAGAGATATTGATTTAAGTGCCTAGCTCGATACATAAACGGGTCTCTCTGGTTAGAC  
 TTGTCTGCCAGACTGTACCTAACCTGCTTGGTACTTAACGGCGTAACGCTCTATAACATAAATTCACGGATCGAGCTATGATTTGCCAGAGAGACCAATCTG

5,890 5,900 5,910 5,920 5,930 5,940 5,950 5,960 5,970 5,980 5,990

CAGATCTGAGCCTGGGAGCTCTCTGGCTAACTAGGAACCACTGCTTAAGCCTCAATAAAGCTTGCTTCAAGTAGTGTGTGCCGCTCTGTTGTGTGA  
 GTCTAGACTCGACCCTCGAGAGACCGATTGATCCCTTGGGTGACGAATTCGGAGTATTTTGAACGGAACCTACGAAGTTCATCACACACGGGCAGACAACACACT

6,000 6,010 6,020 6,030 6,040 6,050 6,060 6,070 6,080 6,090

CTCTGGTAACTAGAGATCCCTCAGACCCTTTTAGTCAGTGTGAAAAATCTCTAGCAGTGGCGCCCGAACAGGGACTTGAAAGCGAAAGGGAAACCAGAGGAGCTCTC  
 GAGACCATTGATCTCTAGGAGTCTGGGAAAATCAGTCACACCTTTTAGAGATCGTCACCGCGGGCTTGCCCTGAACCTTTCGCTTCCCTTTGGTCTCTCGAGAG

6,100 6,110 6,120 6,130 6,140 6,150 6,160 6,170 6,180 6,190 6,200

TCGACGACGACTCGGCTTGTGAAGCGCGCACGGCAAGAGGCGAGGGGCGGCGACTGGTGAAGTACGCCAAAAATTTGACTAGCGGAGGCTAGAAGGAGAGAGATG  
 AGCTGCGTCTGAGCCGAACGACTTCGCGGTGCCGTTCTCCGCTCCCGCCGCTGACCACTCATGCGGTTTTAAACTGATCGCCTCCGATCTTCTCTCTCTAC

6,210 6,220 6,230 6,240 6,250 6,260 6,270 6,280 6,290 6,300 6,310

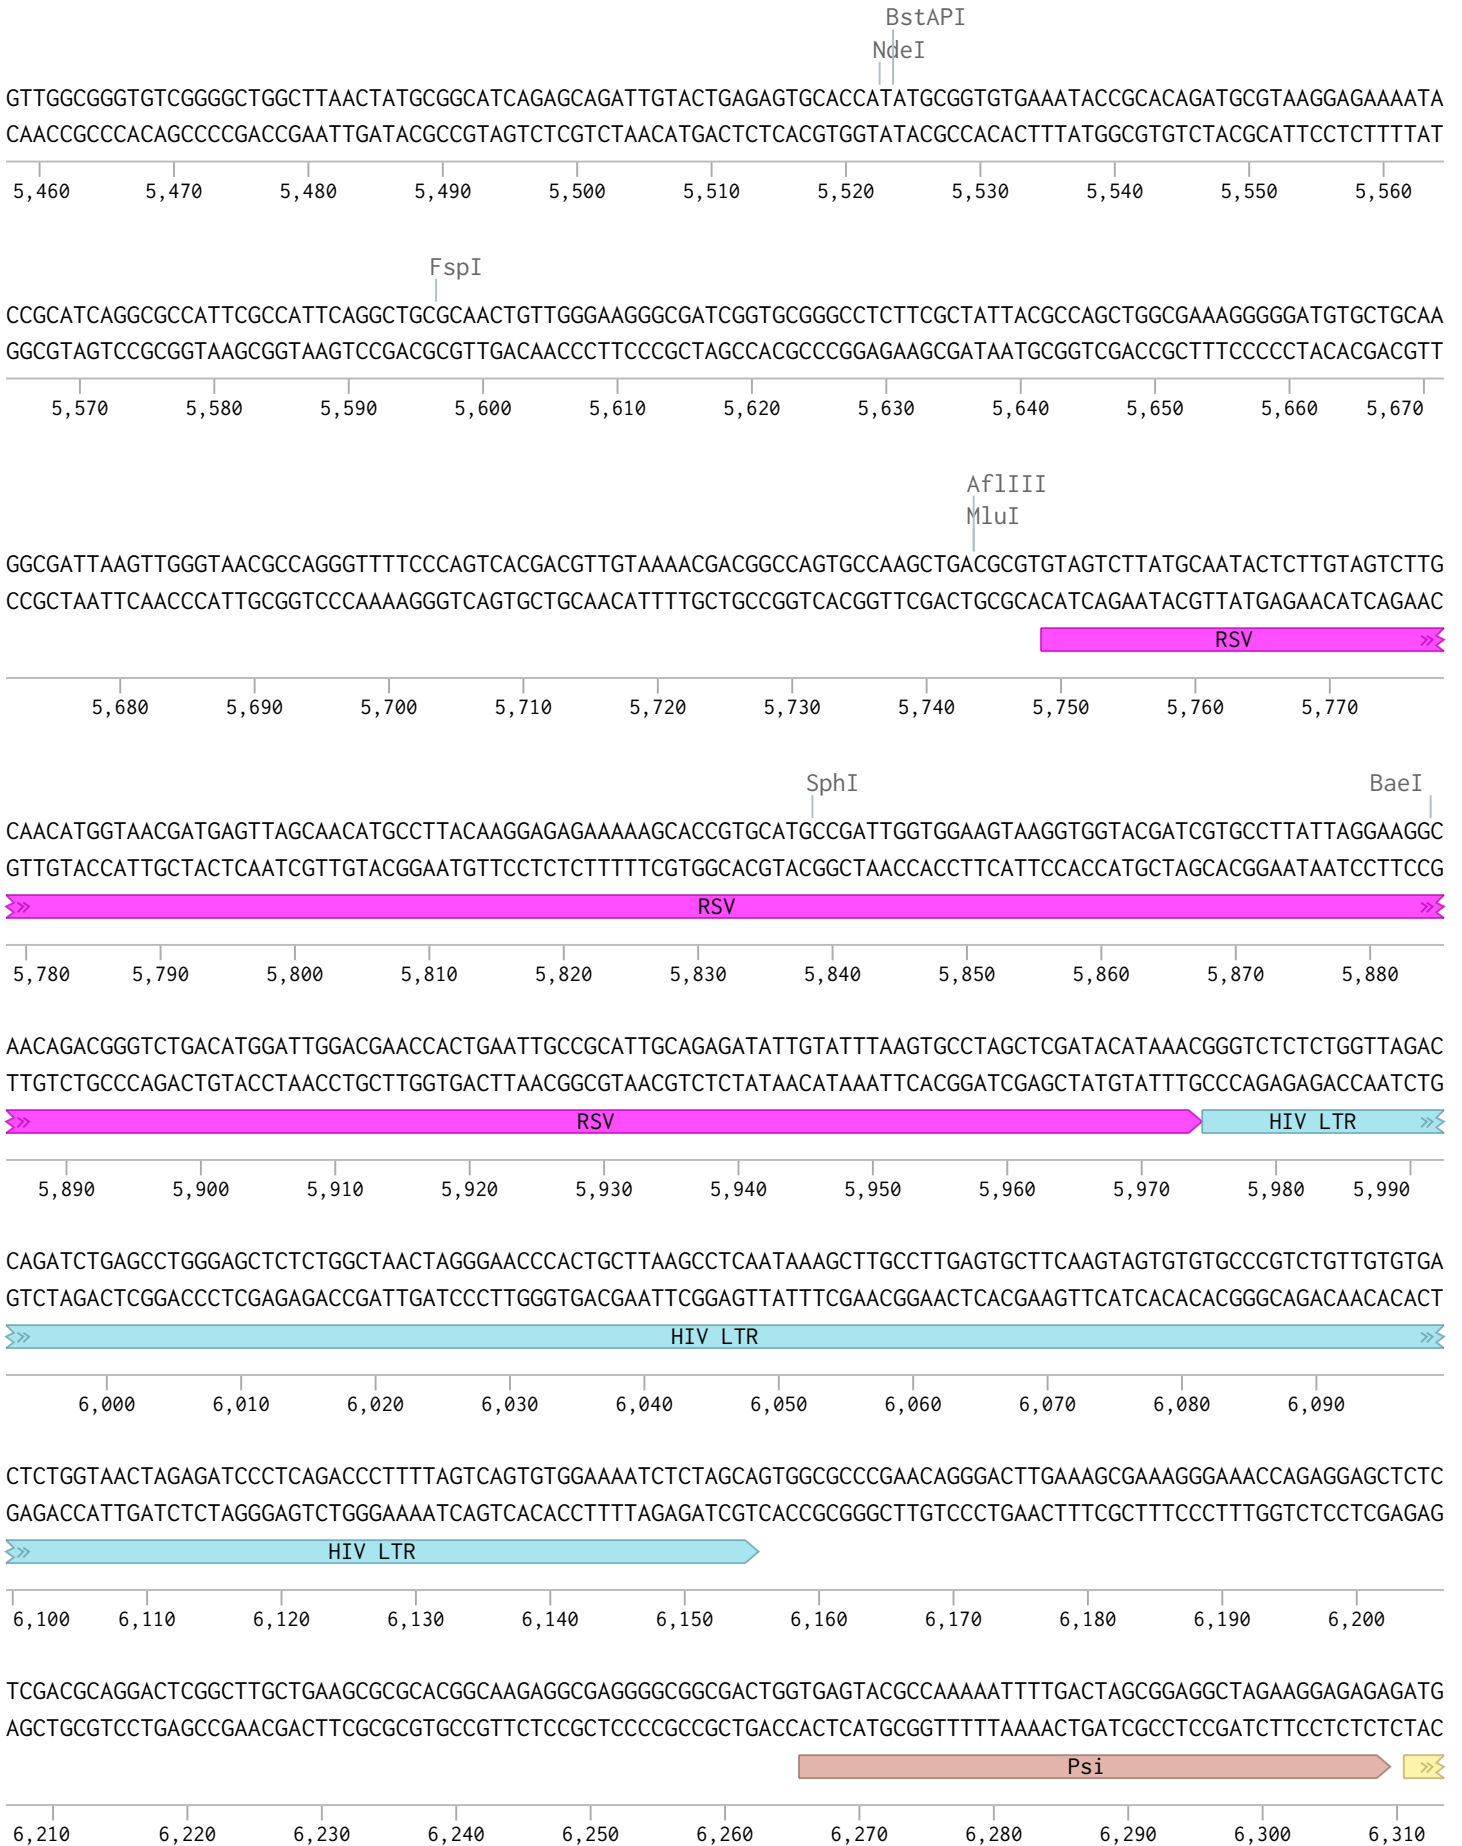

Fyve-HA-TEV219 pCDH-CuO-MCS-EF1 $\alpha$ -CymR-T2A-Bleo3 SparQ (10070 bp)

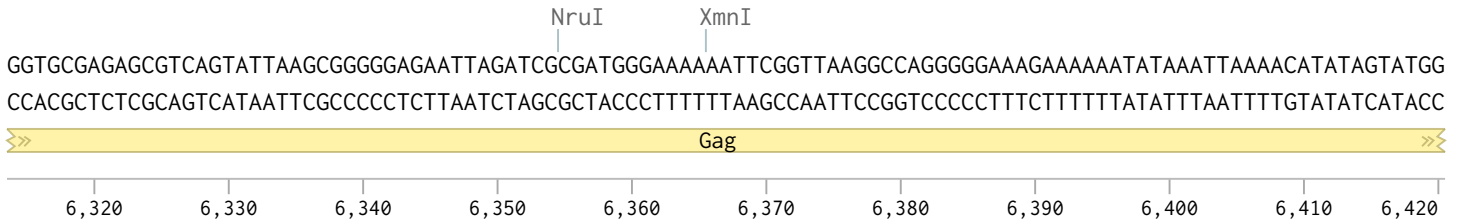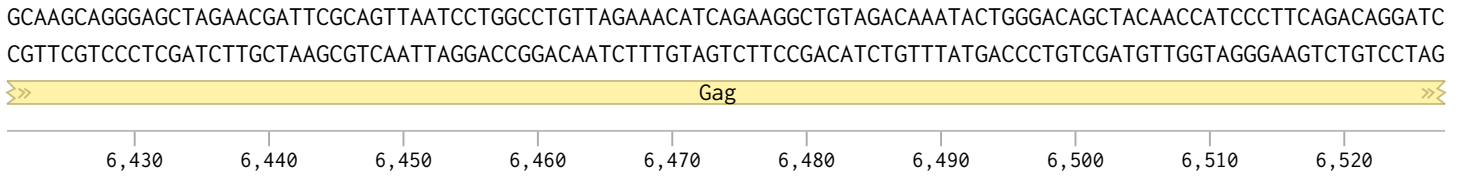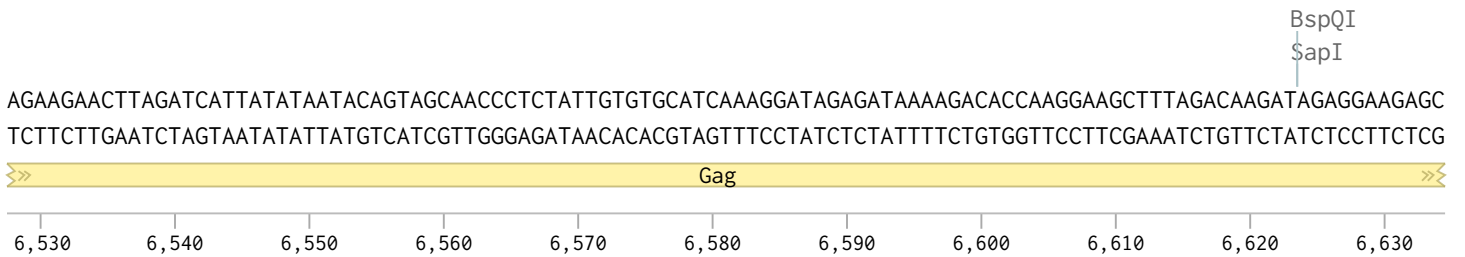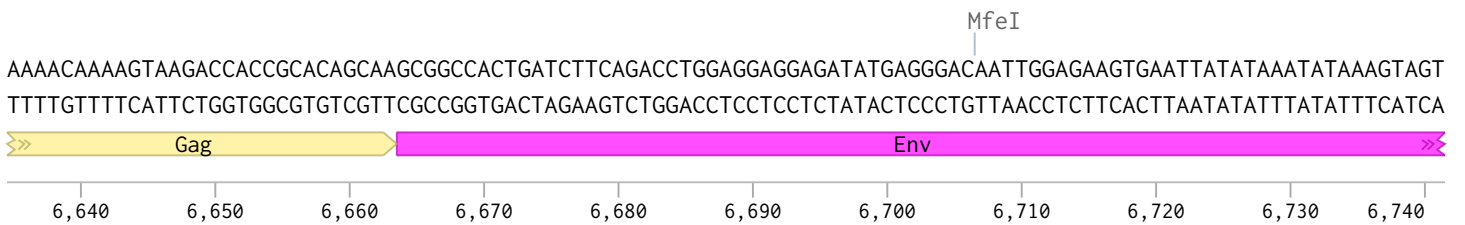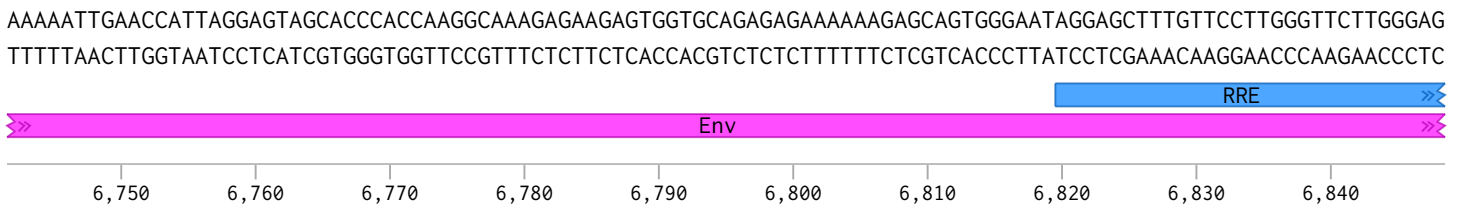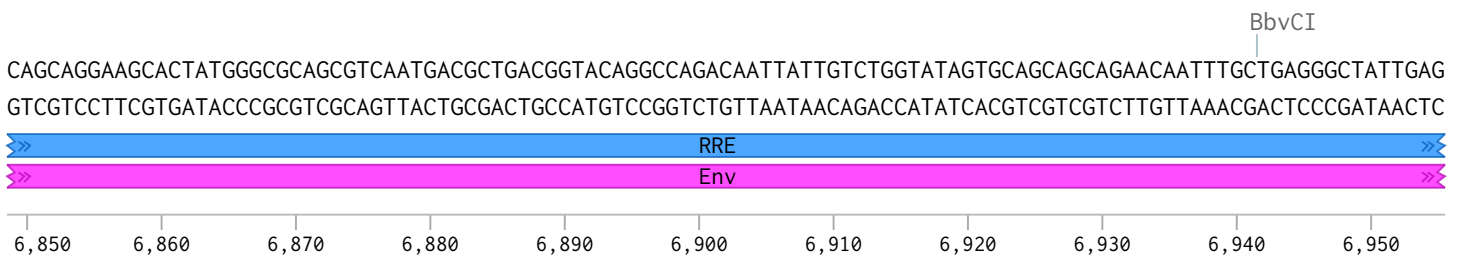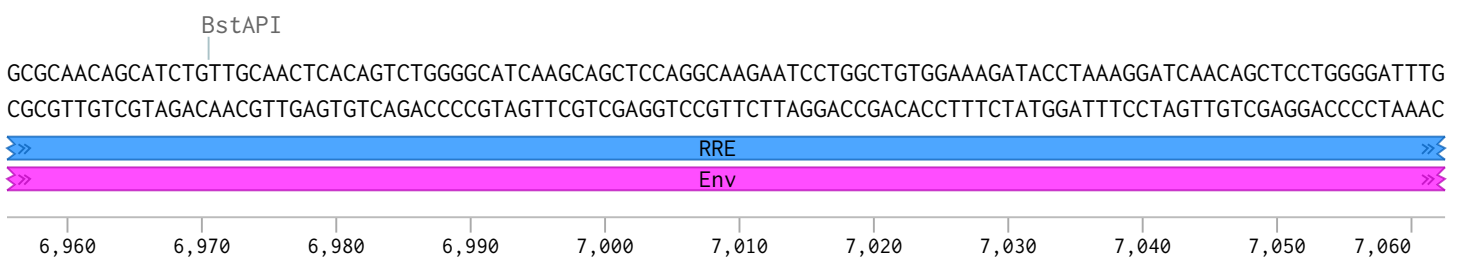

Fyve-HA-TEV219 pCDH-CuO-MCS-EF1 $\alpha$ -CymR-T2A-Bleo3 SparQ (10070 bp)

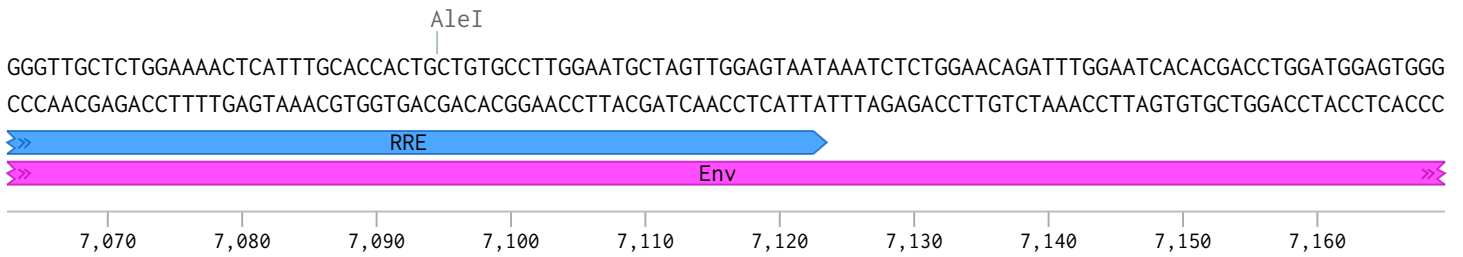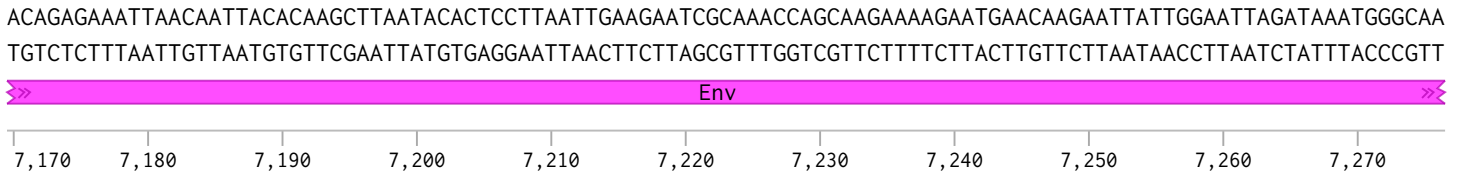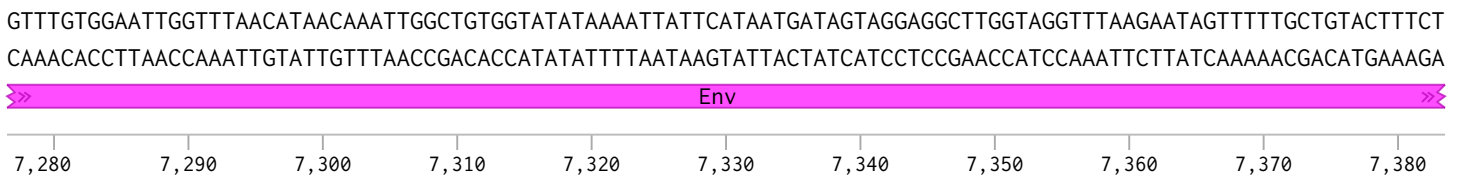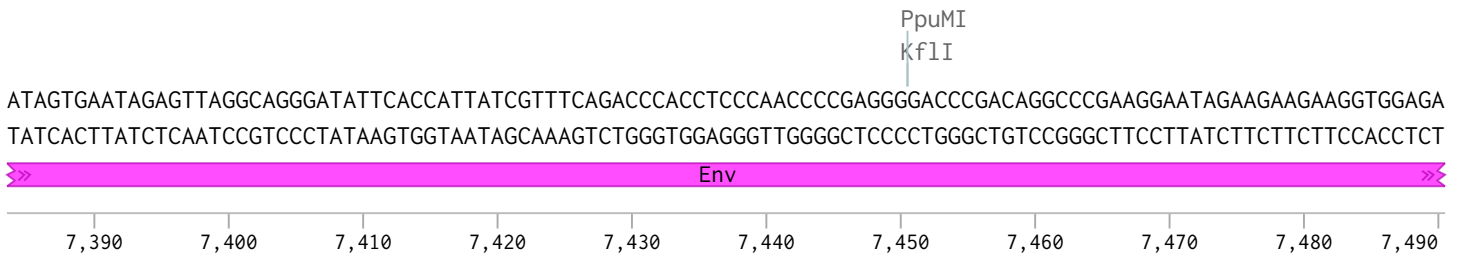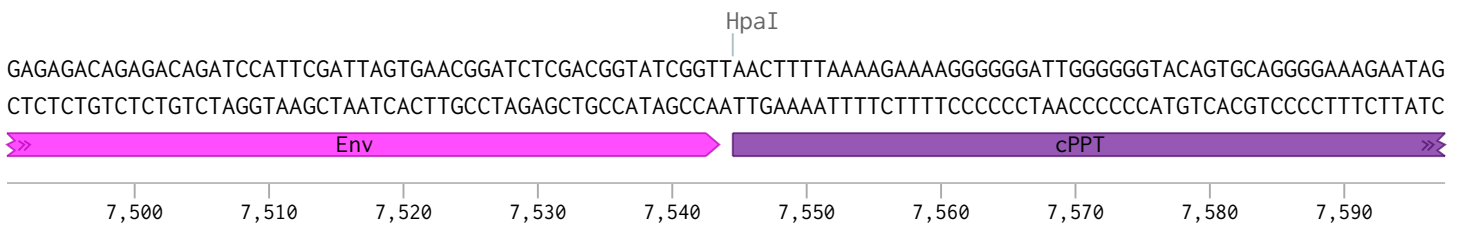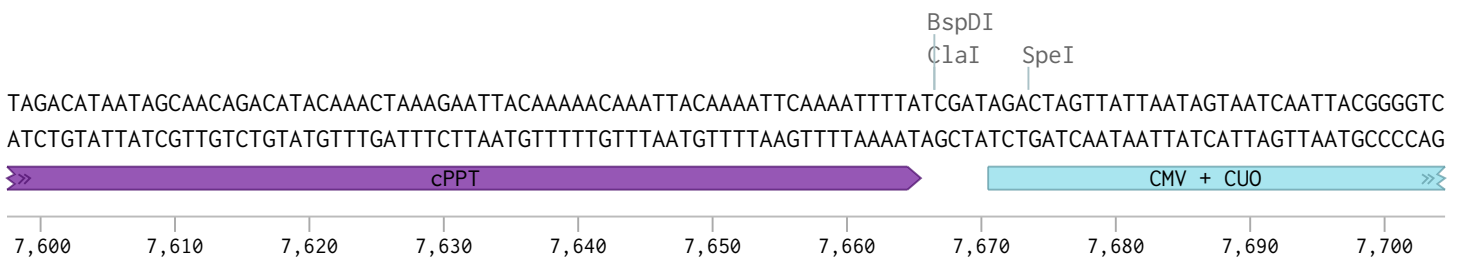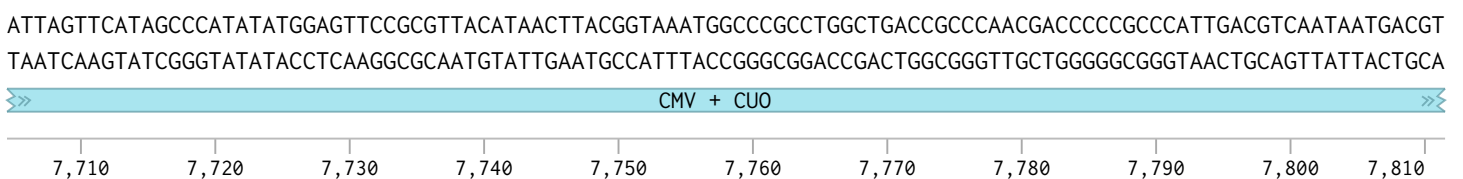

Fyve-HA-TEV219 pCDH-CuO-MCS-EF1 $\alpha$ -CymR-T2A-Bleo3 SparQ (10070 bp)

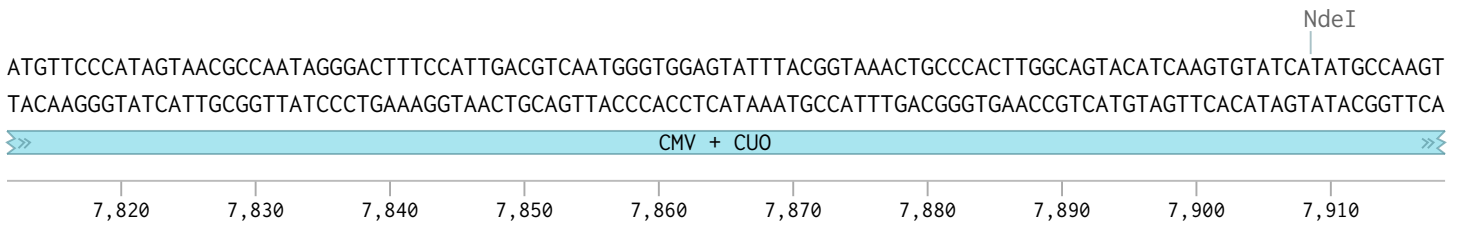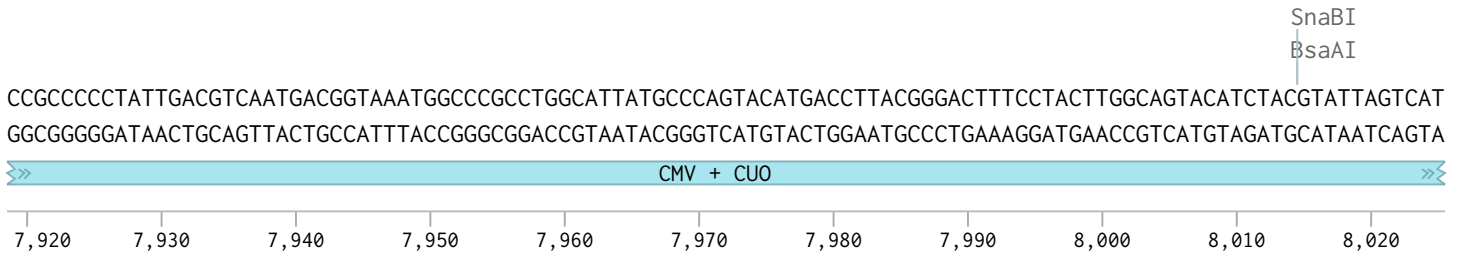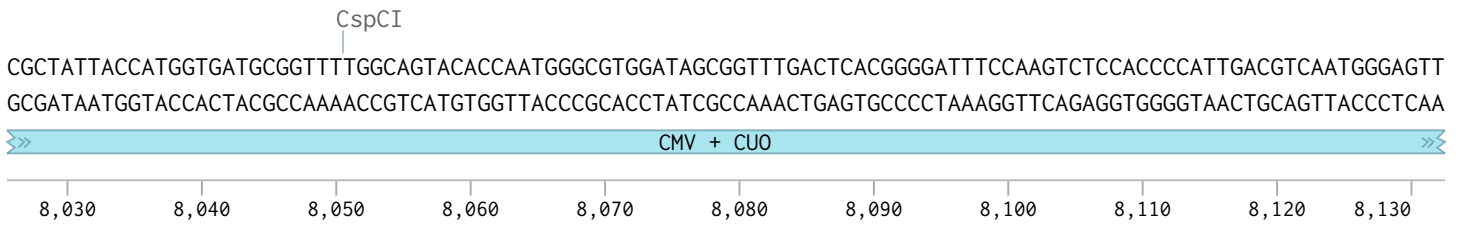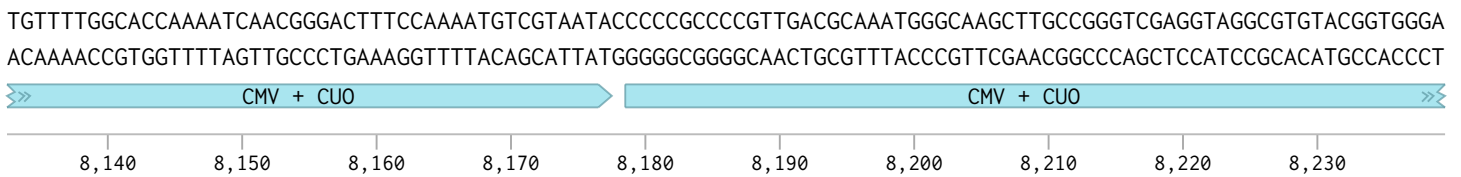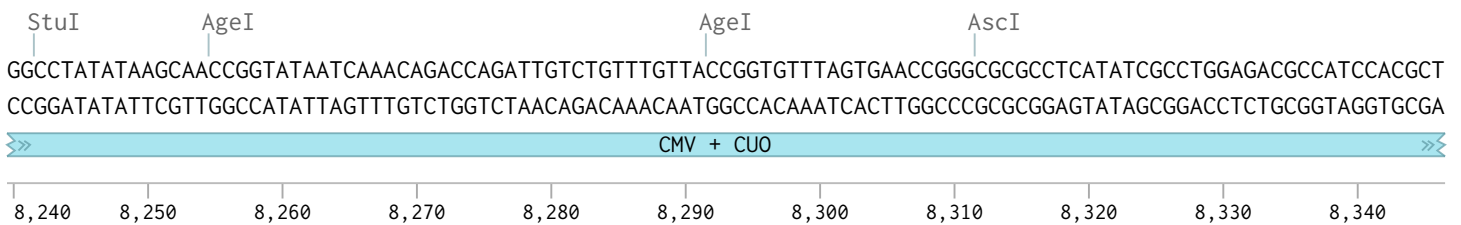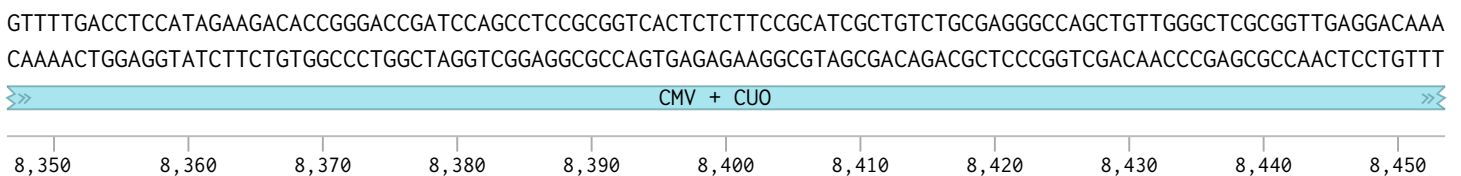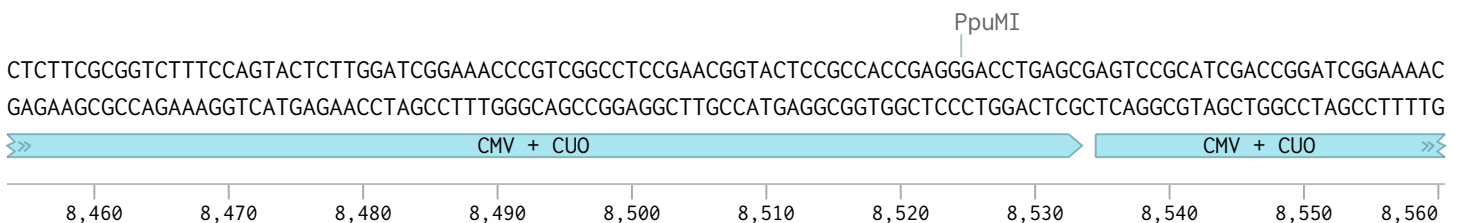

Fyve-HA-TEV219 pCDH-CuO-MCS-EF1 $\alpha$ -CymR-T2A-Bleo3 SparQ (10070 bp)

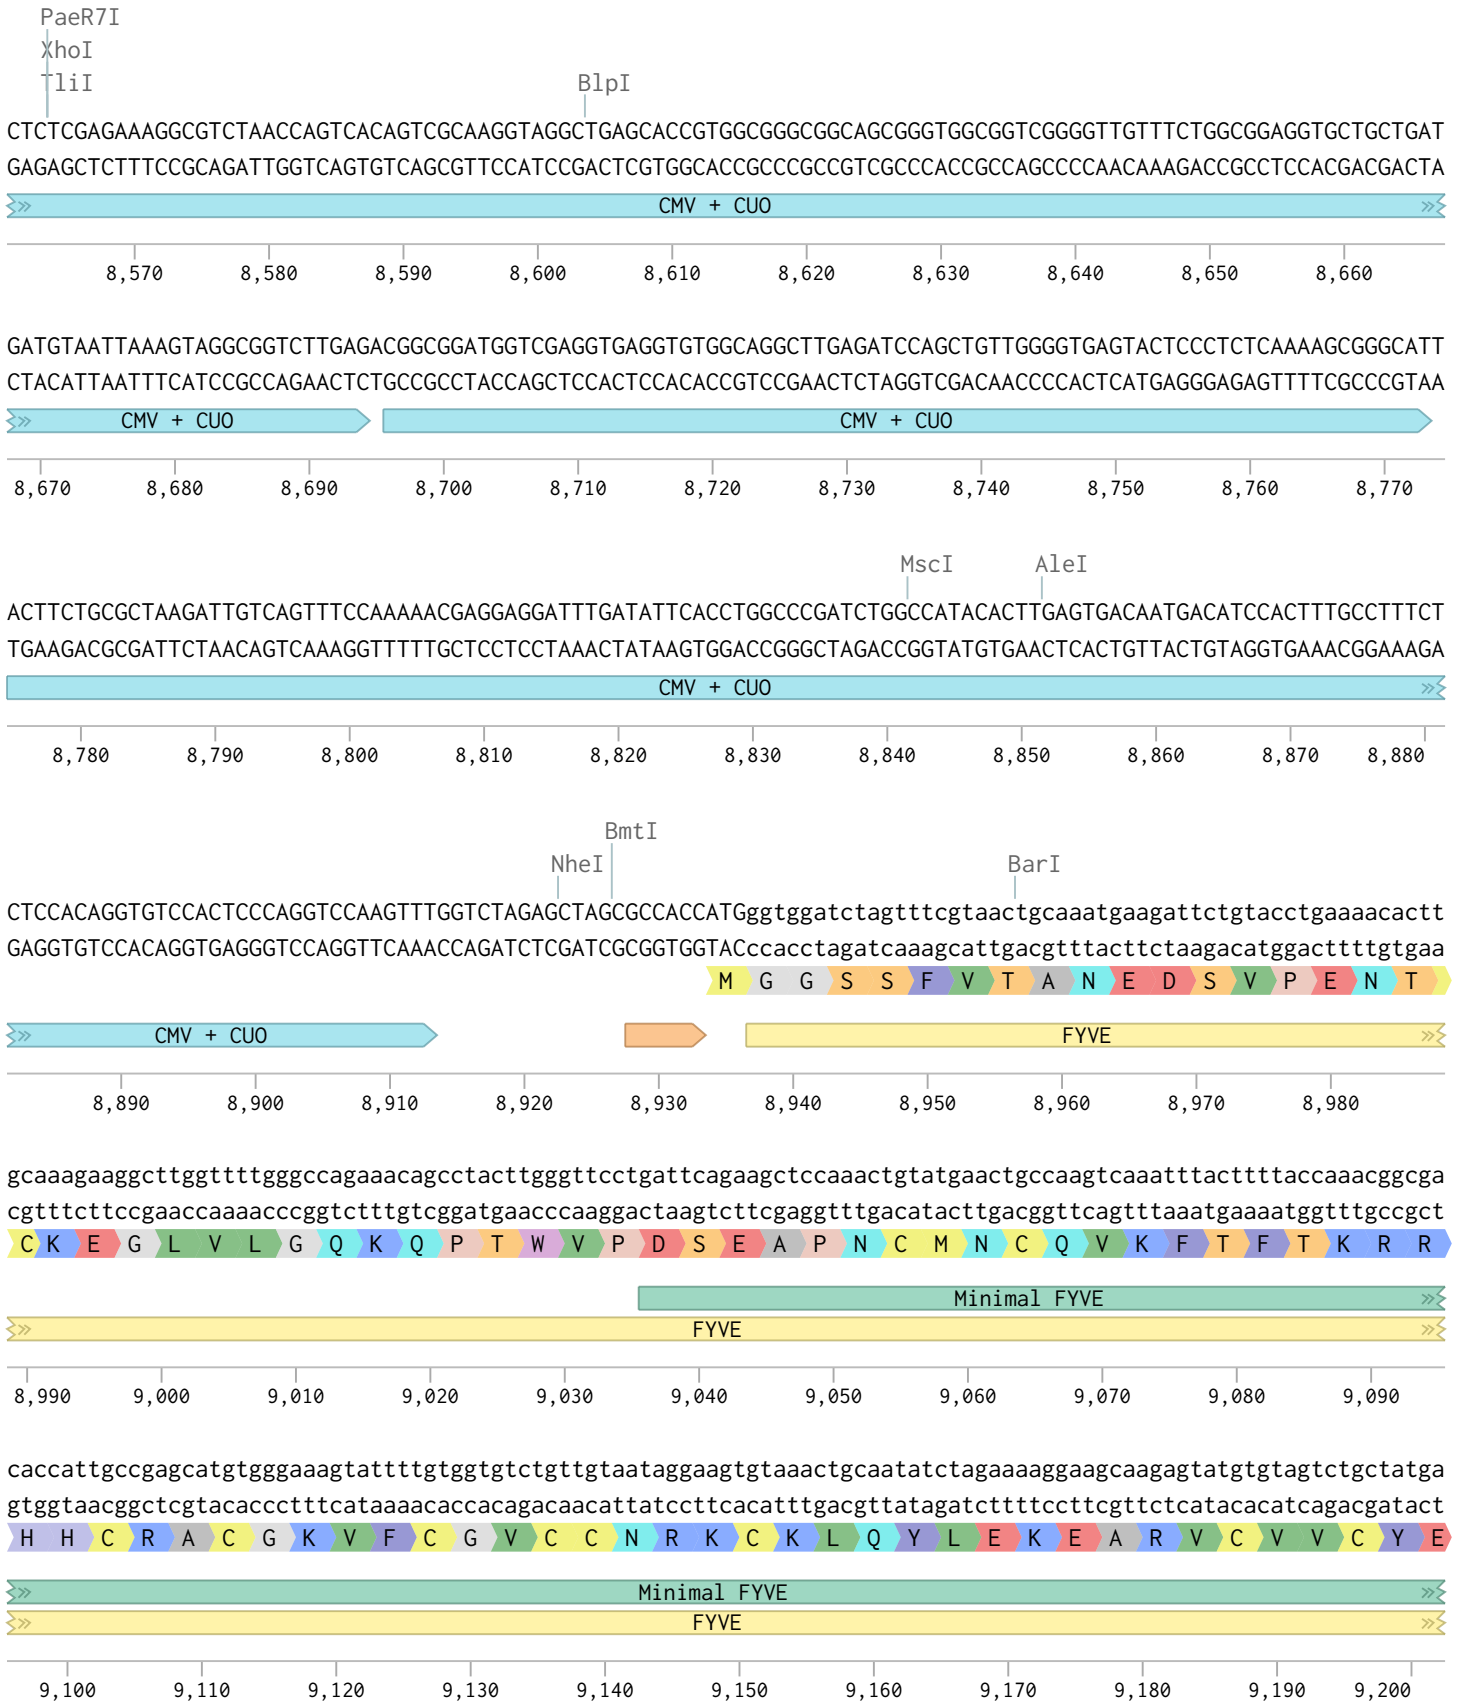



Fyve-HA-TEV219 pCDH-CuO-MCS-EF1 $\alpha$ -CymR-T2A-Bleo3 SparQ (10070 bp)

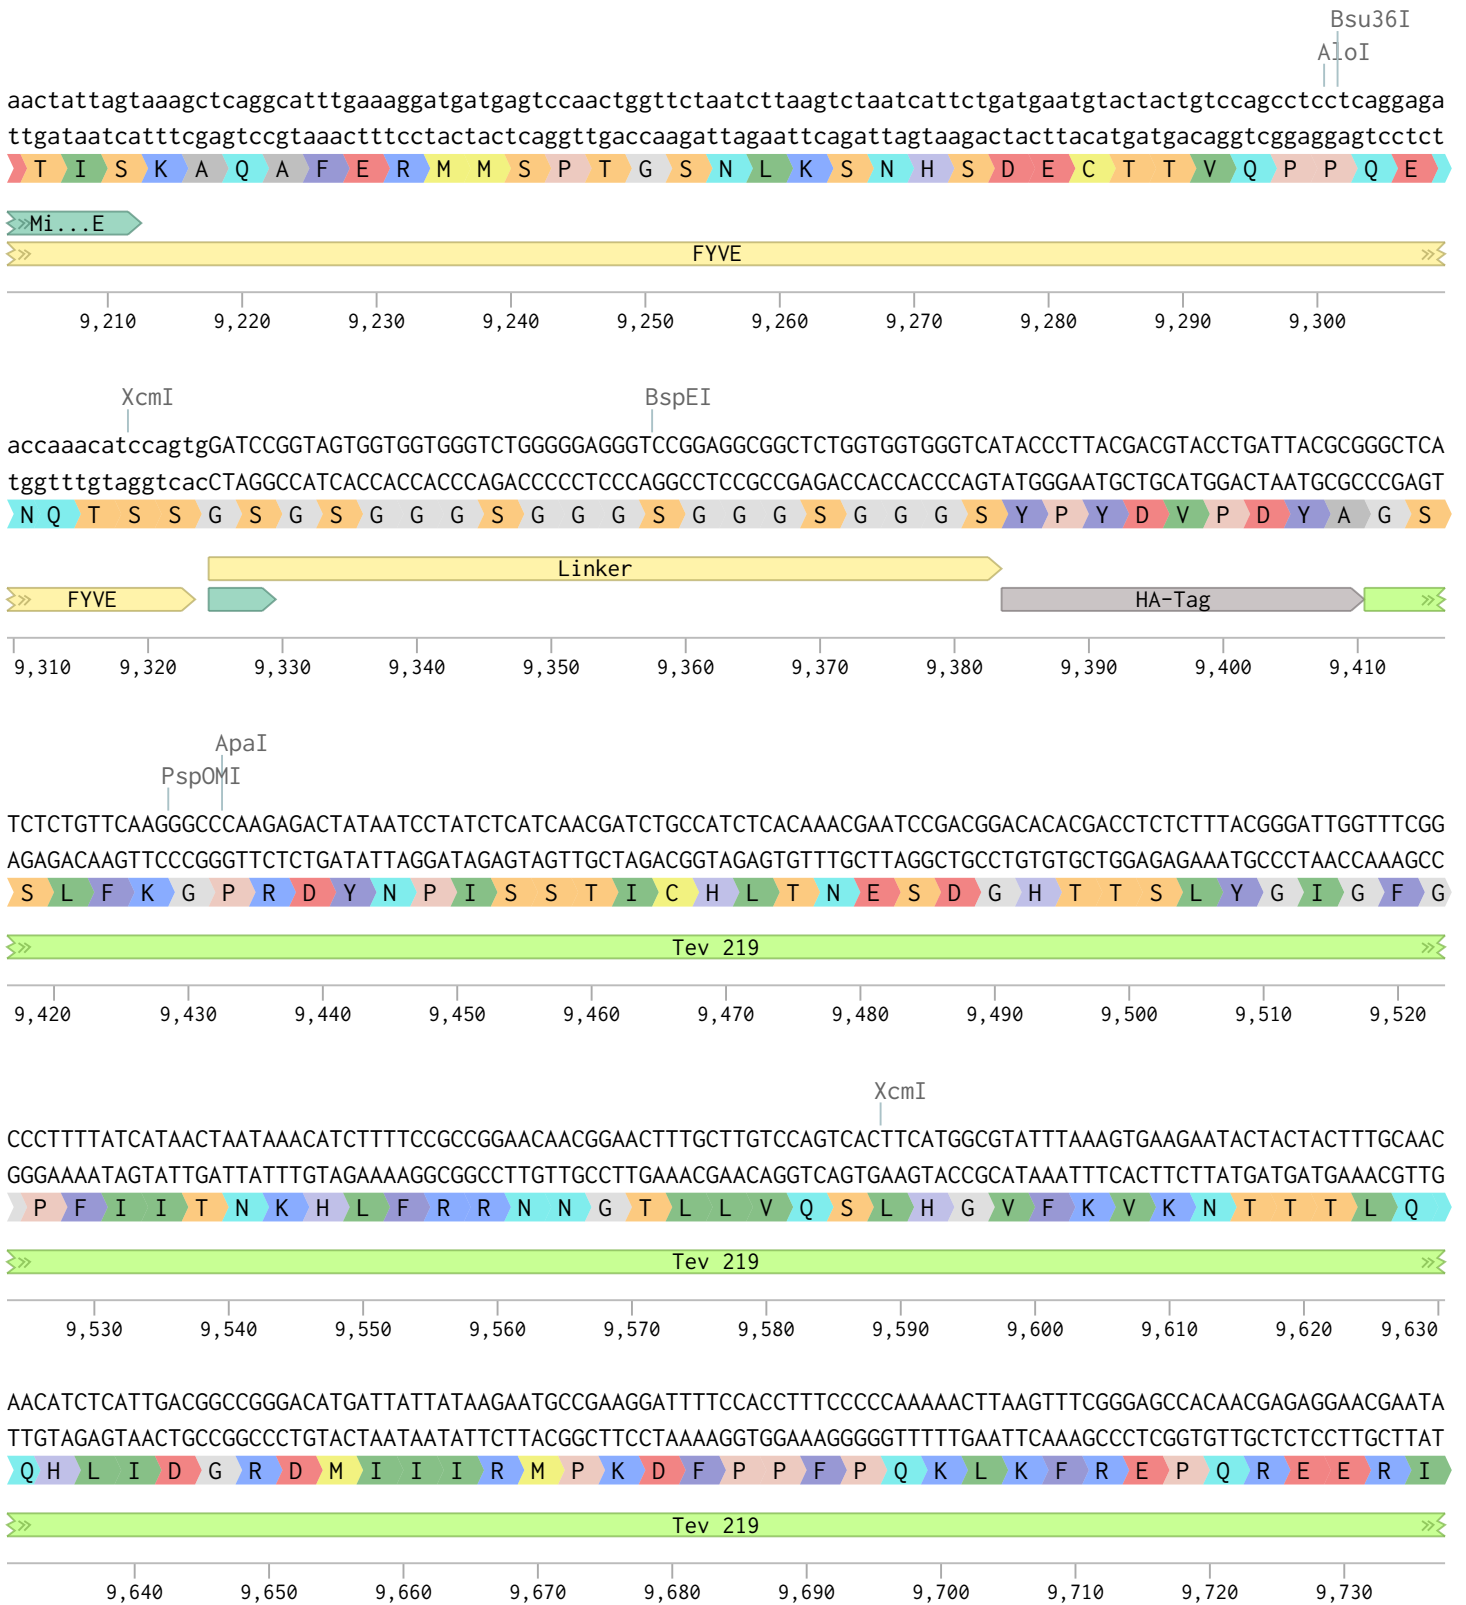

Fyve-HA-TEV219 pCDH-CuO-MCS-EF1 $\alpha$ -CymR-T2A-Bleo3 SparQ (10070 bp)

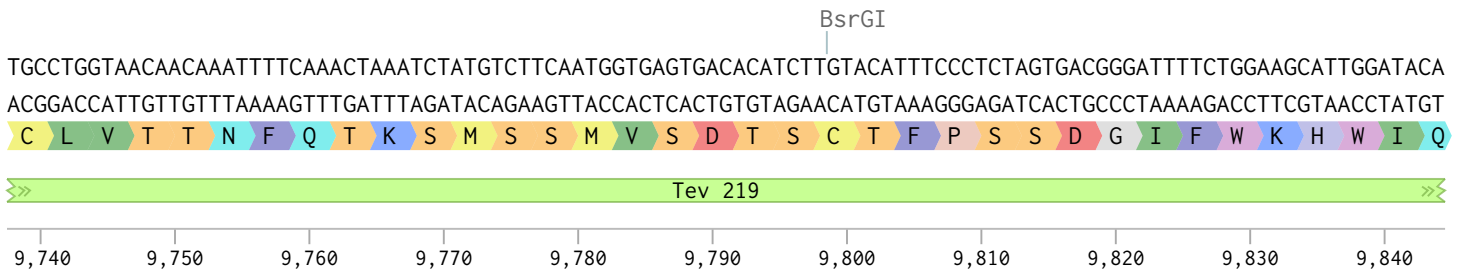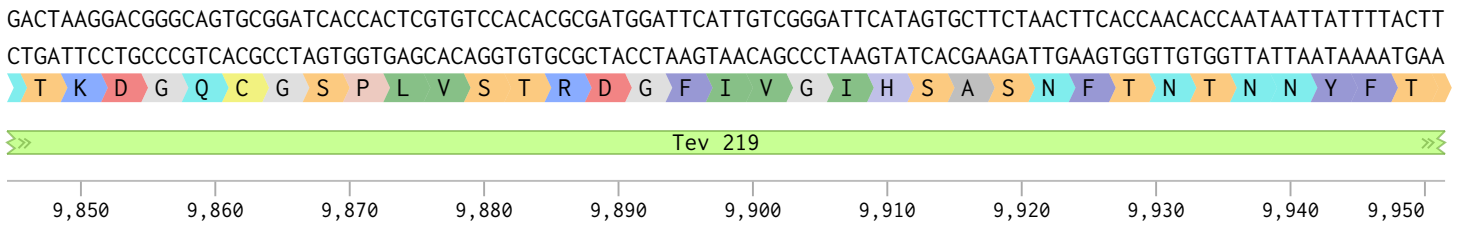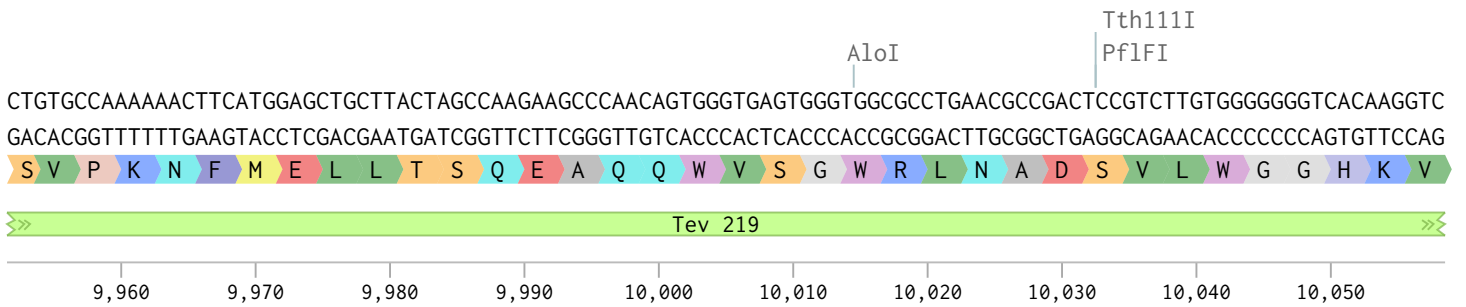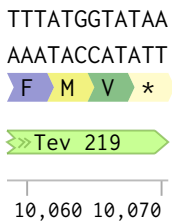

Supplement: 41467_2023_39132_MOESM1_ESM.pdf [file 41467_2023_39132_MOESM1_ESM.pdf]
